# Supplementary material for: Perception of different formats of front-of-pack nutrition labels according to sociodemographic, lifestyle and dietary factors in a French population: cross-sectional study among the NutriNet-Santé cohort participants
Source: PubMed Central journal article supplement — BMJ Open. 2017 Jun 15;7(6):e016108. doi: 10.1136/bmjopen-2017-016108 (PMC5726055; doi:10.1136/bmjopen-2017-016108), 2017-06-15
Supplement: bmjopen-2017-016108.draft_revisions.pdf [file bmjopen-2017-016108.draft_revisions.pdf]

# BMJ Open

## Perception of different formats of front-of-pack nutrition labels according to sociodemographic, lifestyle and dietary factors in a French population

|                                 |                                                                                                                                                                                                                                                                                                                                                                                                                                                                                                                                                                                                                                                                                                                                                                                                                                                                                                                                                                                                                                                                                                                                                                                                                                                                                                                                                                                                                                                                                                                                                                                                                                                                                                                                                                                                                                                                                 |
|---------------------------------|---------------------------------------------------------------------------------------------------------------------------------------------------------------------------------------------------------------------------------------------------------------------------------------------------------------------------------------------------------------------------------------------------------------------------------------------------------------------------------------------------------------------------------------------------------------------------------------------------------------------------------------------------------------------------------------------------------------------------------------------------------------------------------------------------------------------------------------------------------------------------------------------------------------------------------------------------------------------------------------------------------------------------------------------------------------------------------------------------------------------------------------------------------------------------------------------------------------------------------------------------------------------------------------------------------------------------------------------------------------------------------------------------------------------------------------------------------------------------------------------------------------------------------------------------------------------------------------------------------------------------------------------------------------------------------------------------------------------------------------------------------------------------------------------------------------------------------------------------------------------------------|
| Journal:                        | <i>BMJ Open</i>                                                                                                                                                                                                                                                                                                                                                                                                                                                                                                                                                                                                                                                                                                                                                                                                                                                                                                                                                                                                                                                                                                                                                                                                                                                                                                                                                                                                                                                                                                                                                                                                                                                                                                                                                                                                                                                                 |
| Manuscript ID                   | bmjopen-2017-016108                                                                                                                                                                                                                                                                                                                                                                                                                                                                                                                                                                                                                                                                                                                                                                                                                                                                                                                                                                                                                                                                                                                                                                                                                                                                                                                                                                                                                                                                                                                                                                                                                                                                                                                                                                                                                                                             |
| Article Type:                   | Research                                                                                                                                                                                                                                                                                                                                                                                                                                                                                                                                                                                                                                                                                                                                                                                                                                                                                                                                                                                                                                                                                                                                                                                                                                                                                                                                                                                                                                                                                                                                                                                                                                                                                                                                                                                                                                                                        |
| Date Submitted by the Author:   | 26-Jan-2017                                                                                                                                                                                                                                                                                                                                                                                                                                                                                                                                                                                                                                                                                                                                                                                                                                                                                                                                                                                                                                                                                                                                                                                                                                                                                                                                                                                                                                                                                                                                                                                                                                                                                                                                                                                                                                                                     |
| Complete List of Authors:       | <p>Julia, Chantal; Université Paris 13, Equipe de Recherche en Epidémiologie Nutritionnelle, Centre de Recherche en Epidémiologie et Statistiques, Inserm (U1153), Inra (U1125), Cnam, COMUE Sorbonne Paris Cité; Hôpital Avicenne (AP-HP), Public Health Department</p> <p>Péneau, Sandrine; Université Paris 13, Equipe de Recherche en Epidémiologie Nutritionnelle, Centre de Recherche en Epidémiologie et Statistiques, Inserm (U1153), Inra (U1125), Cnam, COMUE Sorbonne Paris Cité,</p> <p>Buscail, Camille; Université Paris 13, Equipe de Recherche en Epidémiologie Nutritionnelle, Centre de Recherche en Epidémiologie et Statistiques, Inserm (U1153), Inra (U1125), Cnam, COMUE Sorbonne Paris Cité; Université Paris 13, Equipe de Recherche en Epidémiologie Nutritionnelle, Centre de Recherche en Epidémiologie et Statistiques, Inserm (U1153), Inra (U1125), Cnam, COMUE Sorbonne Paris Cité</p> <p>Gonzalez, Rebecca; Université Paris 13, Equipe de Recherche en Epidémiologie Nutritionnelle, Centre de Recherche en Epidémiologie et Statistiques, Inserm (U1153), Inra (U1125), Cnam, COMUE Sorbonne Paris Cité</p> <p>Touvier, Mathilde; Université Paris 13, Equipe de Recherche en Epidémiologie Nutritionnelle, Centre de Recherche en Epidémiologie et Statistiques, Inserm (U1153), Inra (U1125), Cnam, COMUE Sorbonne Paris Cité,</p> <p>Hercberg, Serge; Université Paris 13, Equipe de Recherche en Epidémiologie Nutritionnelle, Centre de Recherche en Epidémiologie et Statistiques, Inserm (U1153), Inra (U1125), Cnam, COMUE Sorbonne Paris Cité; Hôpital Avicenne (AP-HP), Public Health Department</p> <p>Kesse-Guyot, Emmanuelle; Université Paris 13, Equipe de Recherche en Epidémiologie Nutritionnelle, Centre de Recherche en Epidémiologie et Statistiques, Inserm (U1153), Inra (U1125), Cnam, COMUE Sorbonne Paris Cité</p> |
| <b>Primary Subject Heading</b>: | Health policy                                                                                                                                                                                                                                                                                                                                                                                                                                                                                                                                                                                                                                                                                                                                                                                                                                                                                                                                                                                                                                                                                                                                                                                                                                                                                                                                                                                                                                                                                                                                                                                                                                                                                                                                                                                                                                                                   |
| Secondary Subject Heading:      | Nutrition and metabolism, Epidemiology, Public health                                                                                                                                                                                                                                                                                                                                                                                                                                                                                                                                                                                                                                                                                                                                                                                                                                                                                                                                                                                                                                                                                                                                                                                                                                                                                                                                                                                                                                                                                                                                                                                                                                                                                                                                                                                                                           |
| Keywords:                       | public health policy, Front-of-pack nutrition labels, Perception                                                                                                                                                                                                                                                                                                                                                                                                                                                                                                                                                                                                                                                                                                                                                                                                                                                                                                                                                                                                                                                                                                                                                                                                                                                                                                                                                                                                                                                                                                                                                                                                                                                                                                                                                                                                                |
|                                 |                                                                                                                                                                                                                                                                                                                                                                                                                                                                                                                                                                                                                                                                                                                                                                                                                                                                                                                                                                                                                                                                                                                                                                                                                                                                                                                                                                                                                                                                                                                                                                                                                                                                                                                                                                                                                                                                                 |

1  
2  
3  
4  
5  
6  
7  
8  
9  
10  
11  
12  
13  
14  
15  
16  
17  
18  
19  
20  
21  
22  
23  
24  
25  
26  
27  
28  
29  
30  
31  
32  
33  
34  
35  
36  
37  
38  
39  
40  
41  
42  
43  
44  
45  
46  
47  
48  
49  
50  
51  
52  
53  
54  
55  
56  
57  
58  
59  
60

SCHOLARONE™  
Manuscripts

For peer review only

1  
2  
3  
4  
5 **Perception of different formats of front-of-pack nutrition labels according**  
6  
7 **to sociodemographic, lifestyle and dietary factors in a French population**  
8  
9

10 Chantal Julia, senior lecturer<sup>1,2</sup>, Sandrine Péneau, senior lecturer<sup>1</sup>, Camille Buscail, resident<sup>1</sup>, Rebecca  
11 Gonzales, Post-doc, Mathilde Touvier, research fellow<sup>1</sup>, Serge Hercberg, professor<sup>1,2</sup>, Emmanuelle  
12 Kesse-Guyot, director of research<sup>1</sup>  
13  
14

15  
16  
17 <sup>1</sup> Université Paris 13, Equipe de Recherche en Epidémiologie Nutritionnelle (EREN), Centre  
18 d'Epidémiologie et Biostatistiques Sorbonne Paris Cité (CRESS), Inserm U1153, Inra U1125, Cnam,  
19 COMUE Sorbonne-Paris-Cité, F-93017 Bobigny, France  
20

21  
22 <sup>2</sup> Département de Santé Publique, Hôpital Avicenne (AP-HP), F-93017 Bobigny, France  
23

24 **Corresponding author/reprints requests:**

25  
26 Chantal Julia c.julia@uren.smbh.univ-paris13.fr  
27

28  
29 Université Paris 13, Equipe de Recherche en Epidémiologie Nutritionnelle (EREN), Centre de  
30 Recherche en Epidémiologie et Biostatistiques, Inserm (U1153), Inra(U1125), Cnam, COMUE  
31 Sorbonne Paris Cité, F-93017 Bobigny, France.  
32

33  
34 74 rue Marcel Cachin F-93017 Bobigny Cedex. France.  
35

36  
37 +33 1 48 38 89 53  
38

39 +33 1 48 38 89 31  
40

41 **Last name of authors:** Julia, Péneau, Buscail, Gonzalez, Touvier, Hercberg, Kesse-Guyot  
42

43 **Abstract word count:** 299  
44

45 **Word count (Introduction to Conclusion):** 3978  
46

47 **Number of figures:**2  
48

49 **Number of tables:** 3  
50

51 **Number of coloured figures:** 2  
52

53 **Supplemental material:** 2 tables  
54

55 **Running title:** FOP label perception  
56  
57  
58  
59  
60

1  
2  
3 **Keywords:** Front-of-pack nutrition labels; perception;  
4

5 **Abbreviations:**

6 5-CNL: Five-colour nutrition label

7 FOP: Front-of-pack

8 FSA: Food Standards Agency

9 FSA-NPS DI : Food Standards Agency Nutrient Profiling System Dietary Index

10 NPS : Nutrient Profiling System

11 OfCom: Office of Communication

12 PNNS: Programme National Nutrition Santé

13 UK: United Kingdom

14  
15  
16  
17  
18  
19 **COPYRIGHT DECLARATION**

20  
21  
22 The Corresponding Author has the right to grant on behalf of all authors and does grant on behalf of  
23 all authors, a worldwide licence to the Publishers and its licensees in perpetuity, in all forms, formats  
24 and media (whether known now or created in the future), to i) publish, reproduce, distribute, display  
25 and store the Contribution, ii) translate the Contribution into other languages, create adaptations,  
26 reprints, include within collections and create summaries, extracts and/or, abstracts of the  
27 Contribution, iii) create any other derivative work(s) based on the Contribution, iv) to exploit all  
28 subsidiary rights in the Contribution, v) the inclusion of electronic links from the Contribution to third  
29 party material where-ever it may be located; and, vi) licence any third party to do any or all of the  
30 above.  
31  
32  
33  
34  
35  
36  
37  
38  
39  
40

41 **CONFLICT OF INTEREST STATEMENT**

42  
43 All authors have completed the Unified Competing Interest form at [www.icmje.org/coi\\_disclosure.pdf](http://www.icmje.org/coi_disclosure.pdf)  
44 (available on request from the corresponding author) and declare that (1) No authors have support  
45 from any company for the submitted work; (2) All authors have no relationships with any company  
46 that might have an interest in the submitted work in the previous 3 years; (3) their spouses, partners, or  
47 children have no financial relationships that may be relevant to the submitted work; and (4) All  
48 authors have no non-financial interests that may be relevant to the submitted work.  
49  
50  
51  
52

53 **AUTHORSHIP CONTRIBUTION**

54  
55 CJ wrote the statistical analysis plan, analysed the data, and drafted and revised the paper. She is the  
56 guarantor. EKG participated in statistical analysis plan, analysed the data and critically revised the  
57  
58  
59  
60

1  
2  
3 paper for important intellectual content. MT CB SP RG analysed the data and critically revised the  
4 paper for important intellectual content. SH designed data collection tools, implemented the study,  
5 monitored data collection for the whole study, and critically revised the draft paper for important  
6 intellectual content. All authors, external and internal, had full access to all of the data (including  
7 statistical reports and tables) in the study and can take responsibility for the integrity of the data and  
8 the accuracy of the data analysis. All authors have read and approved the final manuscript.  
9  
10  
11

## 12 **ETHICS**

13  
14  
15 The NutriNet-Santé study is conducted in accordance with the Declaration of Helsinki, and all  
16 procedures have been approved by the Institutional Review Board of the French Institute for Health  
17 and Medical Research (0000388FWA00005831) and the *Commission Nationale de l'Informatique et*  
18 *des Libertés* (908450 and 909216). Electronic informed consent was obtained from all participants.  
19 The Nutrinet-santé study is registered under EudraCT registration number 2013-000929-31.  
20  
21  
22

## 23 **SOURCES OF SUPPORT**

24  
25  
26 The NutriNet-Santé Study is supported by the French Ministry of Health, the Institut de Veille  
27 Sanitaire, the Institut National de la Santé et de la Recherche Médicale, the Institut National de la  
28 Recherche Agronomique, the Conservatoire National des Arts et Métiers, the Institut National de  
29 Prévention et d'Education pour la Santé and the Fondation pour la Recherche Médicale and Paris 13  
30 University. The funders had no role in study design, data collection and analysis, decision to publish,  
31 or preparation of the manuscript.  
32  
33

34  
35 Study sponsors had no part in study design, collection, analysis, and interpretation of data and the  
36 writing of the article and the decision to submit it for publication. Researchers are independent from  
37 funders and sponsors. All researchers had access to all the data  
38  
39

## 40 **TRANSPARENCY DECLARATION**

41  
42  
43 Chantal Julia affirms that the manuscript is an honest, accurate, and transparent account of the study  
44 being reported; that no important aspects of the study have been omitted; and that any discrepancies  
45 from the study as planned (and, if relevant, registered) have been explained.  
46  
47  
48

## 49 **DATA SHARING**

50  
51  
52 All necessary information is available in the paper.  
53  
54  
55  
56  
57  
58  
59  
60

## ABSTRACT

**Objective:** Four formats for a front-of-pack (FOP) nutrition label are currently considered in France: the Nutriscore (or 5-Colour Nutrition Label, developed by a public research team), the SENS (supported by retailers), multiple traffic lights (MTL, currently used in UK) and a modified version of the Reference Intakes (mRIs, supported by industry). Our objective was to investigate the perception of these FOP labels, according to sociodemographic, lifestyle and dietary factors.

**Design:** Cross-sectional study

**Setting:** Web-based French cohort

**Main outcome measure:** FOP labels perception

**Participants:** Participants in the NutriNet-Santé cohort received a specific questionnaire pertaining to the perception of the four label formats identified. Socio-demographic, lifestyle and dietary data (three 24h dietary records) were collected through self-administered questionnaires. Mutually exclusive clusters of FOP labels perception were identified through a multiple correspondence analysis followed by a hierarchical clustering procedure. Socio-demographic, lifestyle and dietary factors associated with the clusters were explored using multivariable multinomial logistic regression. All analyses were weighted according to 2009 French census data.

**Results:** Among the 21,702 participants in the study, the Nutriscore received the most important number of favourable responses on positive perception dimensions by participants, followed by MTL and SENS. The 5 identified clusters were characterized by marked preferences for Nutriscore (Cluster 1, 43.2% of participants, crude N=9,399), MTL (Cluster 2, 27.3%, crude N=6,163), SENS (Cluster 3, 17.05%, crude N=3,546), mRIs (Cluster 4, 7.31%, crude N=1,632) and none of the presented formats (Cluster 5, 5.10%, crude N=965). The Cluster 1 (Nutriscore) was associated with lower adherence to nutritional recommendations, while Cluster 2 (MTL) was associated with younger age and higher level of education.

1  
2  
3 **Conclusion:** The Nutriscore appears to have a wide reach in the population and to appeal to subjects  
4 with lower adherence to nutritional recommendations. As such, it would appear as a legitimate choice  
5 for policy makers.  
6  
7

## 8 9 10 **ARTICLE SUMMARY**

- 11 • Cross-sectional study in a large population using validated data collection tools.
- 12 • Investigation of multiple dimensions of the perception of FOP labels (awareness, liking,  
13 perceived cognitive workload and trustworthiness), across various formats that are currently  
14 proposed in the French debate on FOP nutrition labelling.  
15  
16
- 17 • Identification of clustered preferences towards each type of format, and investigation of the  
18 association between socio-demographic and dietary factors with FOP label preferences  
19  
20
- 21 • Sample consisting of volunteer subjects included in a cohort study on nutrition, who are therefore  
22 more likely health conscious.  
23  
24
- 25 • Focus on the perception of FOP labels, and not on understanding or use of FOP labels in  
26 purchasing situations.  
27  
28  
29  
30  
31  
32  
33  
34  
35  
36  
37  
38  
39  
40  
41  
42  
43  
44  
45  
46  
47  
48  
49  
50  
51  
52  
53  
54  
55  
56  
57  
58  
59  
60

## INTRODUCTION

Preventing non-communicable diseases has become a top priority for most industrialized countries, as they represent a major part of the burden of diseases (1). Diet has been recognized as a key modifiable factor which can influence – as preventive or risk factor – a wide range of non-communicable diseases, from cardiovascular disease to cancer, type 2 diabetes, metabolic syndrome or obesity (2-4). Given its potential lever for improvement of the health status of the population, most western countries have invested in state-level public health programs on nutrition, promoting healthy diets and physical activity (5-7). In France, the National Nutrition and Health Program (Programme National Nutrition et Santé, PNNS), launched in 2001 (8), sets a regulatory environment that promotes synergistic actions towards healthy eating and physical activity. The most pervasive actions that have been taken towards the population have consisted in the dissemination of nutrition recommendations in multimedia campaigns and booklets (9;10). Those recommendations act upon the nutrition knowledge of individuals, prompting them to modify their dietary behaviour by promoting consumption of some food groups (e.g. fruits and vegetables, whole-grain cereals, water) or limiting excessive intakes of others (saturated fat, added sugar and sodium) (11). Recently, novel complementary strategies have been put forward in a report to the French Minister of Health in 2014, highlighting the need for specific measures to modify the nutritional environment beyond the actions at the individual level (12). The report stressed in particular measures pertaining to nutrition labelling, in the form of a simplified front-of-pack (FOP) nutrition label, advertising regulation and nutritional taxation (12). Among the proposals of this report, the implementation of a FOP nutrition labelling system was considered as an effective opportunity by the Health Minister, and its principle was introduced in the 2016 French Health Law (13). However, though the initial report contained a detailed proposal for the label supported by scientific studies (14-26) and independent government agencies evaluations (27;28) in the form of the 5-Colour Nutrition Label (5-CNL), alternative proposals were put forward during the debate by industry and retailers, in a vast lobbying campaign (29). Finally, four alternative formats emerged in the debate: the 5-CNL (with a graphical format termed Nutriscore), SENS (developed and promoted by retailers), Multiple Traffic Lights (MTL, currently used in the United Kingdom, UK) and



1  
2  
3 a modified version of the Reference Intakes (mRIs, promoted by industry) (**Figure 1**). However, to  
4  
5 date, no scientific study has directly compared the perception of the four proposed formats. Some  
6  
7 studies tend to indicate that the 5-CNL would be more effective than MTL or RIs (16-18;30), but no  
8  
9 data has been published on the mRIs or the SENS formats.

10  
11  
12 The objective of the present study was therefore to investigate the perception of the four formats that  
13  
14 have been put forward in France in the debate on FOP nutrition labelling, in a comparative design  
15  
16 carried out in the NutriNet-Santé cohort.

## 17 18 19 **MATERIAL AND METHODS**

### 20 21 22 **Population**

23  
24 Participants were selected from the NutriNet-Santé cohort. Briefly, the NutriNet-santé study is a  
25  
26 prospective cohort study set in France in which inclusion and follow-up of volunteer participants are  
27  
28 performed on the Internet (31). The main objectives of the NutriNet-santé study are: 1) to investigate  
29  
30 the relationship between nutrition and health outcomes; and 2) to investigate the determinants of  
31  
32 dietary patterns and nutritional status. Inclusion in the study began in May, 2009, and is still ongoing.  
33  
34 Volunteer participants aged >18 years-old subscribe to the study, and are included when they have  
35  
36 completed a set of questionnaires assessing: diet (through repeated 24h dietary records), physical  
37  
38 activity, anthropometry, lifestyle and socio-economic conditions and health status. These five types of  
39  
40 questionnaires are repeated yearly and have been validated against traditional assessment methods  
41  
42 (paper or interview by dietitians) (32-34). Once the subject is included in the cohort, he receives  
43  
44 monthly web-questionnaires pertaining to various aspects of dietary behaviour, physical activity and  
45  
46 health. One of these questionnaires pertained to the perception of the various FOP labelling systems  
47  
48 that have been proposed in the French context and was sent to all participants in the cohort in June  
49  
50 2016.

51  
52  
53 Detailed information on the NutriNet-Santé study can be found elsewhere (31).  
54  
55  
56  
57  
58  
59  
60

## Ethics

The NutriNet-Santé study is conducted in accordance with the Declaration of Helsinki, and all procedures have been approved by the Institutional Review Board of the French Institute for Health and Medical Research (0000388FWA00005831) and the *Commission Nationale de l'Informatique et des Libertés* (908450 and 909216). Electronic informed consent was obtained from all participants.

The NutriNet-Santé study is registered under EudraCT registration number 2013-000929-31.

## Perception of FOP labels

A specific questionnaire was developed to investigate the perception of the 4 various formats of FOP labelling that have been proposed in the French current political debate on FOP labelling, based on previous research on the topic (17;35). A brief presentation of the four FOP labels was provided for the participants at the beginning of the questionnaire. The presentation made no mention of the origin or support by researchers or industry of each format, in order not to influence the participants based on this information.

Briefly, the Nutriscore, developed by the EREN scientific research team, and based on the British Food Standards Agency nutrient profiling system and adapted for the French context by the High Council for Public Health (28) presents for each food or beverage the overall nutritional quality on a 5-point colour-coded scale from Green to Red (**Figure 1**). SENS, supported by retailers, is based on a nutrient profiling system developed by a research team, and presents for each food or beverage a recommended frequency of consumption, with a 4 points colour-coded scale (Green, Blue, Orange and Purple) (**Figure 1**). MTL, implemented in Great Britain since 2005 presents the numeric values of the contribution of a portion of the food to the intakes in a balanced diet (in grams and percentage of reference intakes, corresponding to the reference intakes label) for energy, fats, saturated fats, sugar and sodium, with a colour-coding (Green, Amber and Red) for each of these components of the food (**Figure 1**). The Modified Reference Intakes (mRIs) present the numeric values of the reference intakes, in both grams and percentage of reference intakes, with bars varying in height depending on the amount of the component in the food (**Figure 1**).

1  
2  
3 Overall, 13 questions were asked on various aspects of liking (e.g. “This is my preferred FOP label”),  
4 trustworthiness (e.g. “This FOP label provides reliable information”), awareness (e.g. “This FOP label  
5 is easy to identify”) and perceived cognitive workload (e.g. “This label is too complex for  
6 understanding”) (see **Supplemental table 1**). For each question, subjects were asked to select among  
7 the four formats the label that best corresponded to them. The participants could also select that ‘none’  
8 of the proposed labels corresponded to his/her perception.  
9  
10  
11  
12  
13

### 14 **Socio-demographic and lifestyle data**

15  
16 Socio-demographic and lifestyle data were collected through self-administered questionnaires and  
17 included age, gender, education (no diploma and up to secondary education, University  $\leq 2$  years,  
18 University  $> 2$  years ), marital status (in couple, single/divorced/widowed), income per household unit  
19 (36) ( $<1200$ /month, 1200 – 1800, 1800 – 2700,  $\geq 2700$  €/month) and smoking status (current smoker,  
20 former smoker and never smoker). Physical activity was computed using self-declared data from the  
21 validated International Physical Activity Questionnaire (low, moderate and high physical activity  
22 levels) (37). The data collected in the questionnaire closest in time to the questionnaire pertaining to  
23 FOP labels perception were taken into account for the analyses.  
24  
25  
26  
27  
28  
29  
30  
31  
32  
33  
34

### 35 **Dietary data**

36  
37 Dietary data were derived from three repeated 24-hour records randomly distributed in a two-week  
38 period, with two week days and one week-end day. Food consumption was weighted according to the  
39 day of the week of each record. The participants are asked to estimate the portion size for each  
40 reported food and beverage item using validated photographs (38). Nutrient intake was computed  
41 using a published food composition database reflecting foods usually consumed in the French diet  
42 (39). Under-reporters for energy intake were identified using Goldberg/Black’s method and were  
43 excluded (40). The dietary data from the 24h dietary record in the NutriNet-Santé study have been  
44 validated against record by phone by trained dieticians, and against biomarkers of nutritional status  
45 (33;41;42).  
46  
47  
48  
49  
50  
51  
52  
53  
54  
55  
56  
57  
58  
59  
60

### Statistical analysis

For the present study, all participants who had completed the questionnaire on the perception of FOP labels, and having completed information on all covariates were eligible to the present study. Subjects were excluded if they stated that they never engaged in grocery shopping. The records and questionnaires closest to the questionnaire pertaining to FOP labels perception were taken into account for the analyses.

### Weighting of the data

All data were weighted using the SAS CALMAR (CALage sur MARGes) macro developed in France by the Institute of National Statistics (INSEE) to weight survey data to be representative of the French census population (43). Data used for weighting were sex, age and educational level.

### Adherence to dietary recommendations

Adherence to French dietary recommendations was assessed using a modified version of the PNNS guidelines score (namely, the “*Programme National Nutrition Santé*”-guideline score, PNNS-GS), taking into account only dietary recommendations. The PNNS-GS development, including food groupings, serving sizes, scoring, cut-off and penalties, has been previously described in detail (44). Briefly, this 15-point score is based on French national guidelines and includes 13 components. The eight components referring to food serving recommendations and four components referring to moderation in consumption were included in the modified version of the PNNS-GS (mPNNS-GS) (45). The last component focusing on adherence to physical activity recommendations was not taken into account.

A penalty for overconsumption was assigned to individuals with energy intakes higher than estimated energy expenditure (44). Age and self-reported weight and height at inclusion were used to estimate Schofield’s basal metabolic rate (BMR) (46). Energy expenditures were estimated using BMR and physical activity level. In case of energy intake greater than 5% over the estimated energy expenditure, an identical part was subtracted from the score. Quartiles of mPNNS-GS were computed and used throughout the analyses.

### *Dietary clusters identification*

The responses from the 13 “perception” questions were used in a multiple correspondence analysis, which yielded 4 dimensions of FOP labelling perception. The dimensions were selected based on their adjusted inertia (respectively 33.6%, 23.0%, 18.4% and 17.2% for a total of 92.3%). The selected dimensions were used as input variables in a two-ways clustering procedure based on hierarchical and K-means methods (SAS CLUSTER and FASCLUST procedures). The plot of semi-partial  $R^2$ , the semi-partial  $T^2$  and the Cubic Clustering Criterion (CCC) by the number of clusters were used to identify the optimal number of clusters.

### *Statistical analysis*

All analyses were weighted according to the CALMAR macro, except the clustering procedure for which no weighting option is available. The responses to each of the 13 questions were mapped across clusters, in order to identify the FOP perception characteristics of each cluster. Socio-demographic, lifestyle and dietary variables were mutually adjusted against clusters in a multivariable multinomial regression. Adjusted-percentages for each socio-demographic, lifestyle and dietary characteristic were extracted from this procedure across clusters.

All tests were two-sided and a P value  $<0.01$  was considered significant, given the high number of statistical tests performed and the large sample size. Statistical analyses were performed using SAS Software (version 9.3, SAS Institute Inc, Cary, NC, USA).

## **RESULTS**

Overall, 38,604 subjects completed the questionnaire pertaining to the perception of the various FOP labels formats. Among these, 714 were excluded because they never engaged in grocery shopping.

Among the 37,890 remaining subjects, 16,188 were excluded for incomplete data on covariates (the vast majority of which (N=13,066) for incomplete data on mPNNS-GS computation, which requires the presence of three 24h records, frequency questionnaire on alcohol consumption and frequency of seafood consumption, leading to an overall sample of 21,702 participants for analysis.

1  
2  
3 Characteristics of the crude and weighted sample are presented in **Table 1**. The crude sample  
4 exhibited a higher percentage of females (73.4%), older subjects (68.4% were  $\geq 50$  years-old),  
5 educated (37.5% had above 2 years of university training) and with high incomes (38.5% had incomes  
6  $>2700\text{€}/\text{month}$ ).  
7  
8  
9

10  
11 Overall, the Nutriscore was the label receiving the most important number of favourable responses on  
12 positive perception dimensions by participants, followed by MTL and SENS (43.8% of participants  
13 considered the Nutriscore as their preferred FOP label, followed by 24.9% for MTL and 17.2% for  
14 SENS) (**Table 2**). Conversely, RIs yielded the highest number of responses on negative dimensions of  
15 perception (complexity and time processing). A majority of participants considered that none of the  
16 proposed labels were guilt-laden (50.2%), followed by SENS (21.2%)  
17  
18  
19  
20  
21  
22  
23

24  
25 The clustering procedure resulted in the identification of 5 mutually exclusive groups of subjects  
26 according to their perception of FOP nutrition labels. Clusters represented 43.2% (crude N=9,399),  
27 27.3% (crude N=6,163), 17.05% (crude N=3,546), 7.31% (crude N=1,632) and 5.10% (crude N=965)  
28 of participants, respectively. The mapping of perception responses across clusters showed that each  
29 cluster was characterized by a marked preference for one of the proposed FOP nutrition label formats:  
30 Cluster 1 displayed a marked preference for the Nutriscore, Cluster 2 for the MTL, Cluster 3 for the  
31 SENS, Cluster 4 for the RIs and Cluster 5 for none of the presented labels (**Figure 2**). Therefore,  
32 clusters were termed according to their label preference. These preferences across cluster were  
33 particularly prominent for the following aspects: label wanted on the front of the packages ( $>85\%$  for  
34 each specific FOP label in their respective cluster), preferred label ( $>80\%$  for each specific label in  
35 their respective cluster), label allowing to choose healthier products ( $>65\%$  for each specific label in  
36 their respective cluster), trustworthiness ( $>74\%$  for each specific label in their respective cluster)  
37 (**Figure 2**). However, for some dimensions of perception, responses were somewhat less marked for  
38 each specific FOP label, and more concurrent across clusters. For example,  $>23\%$  of participants in all  
39 clusters considered that the Nutriscore was quick to process,  $>19\%$  considered it easy to identify, and  
40  $>17\%$  considered it easy to understand (**Figure 2**). Conversely,  $>20\%$  of participants in all clusters  
41 considered the mRIs to be too complex for understanding (except in its own where it obtained 11% of  
42  
43  
44  
45  
46  
47  
48  
49  
50  
51  
52  
53  
54  
55  
56  
57  
58  
59  
60

1  
2  
3 opinions), >19% considered it too long to understand (except in its own cluster, with 12% of  
4  
5 opinions), and was considered as the least appreciated FOP nutrition label for 66.7% of subjects in the  
6  
7 Cluster Nutriscore, 61.9% of subjects in the Cluster SENS, 39.9% of subjects in the Cluster MTL and  
8  
9 10.8% of subjects in the Cluster None (**Figure 2**). Finally, participants considered that none of the  
10  
11 presented labels was guilt-laden: 87.1% of Cluster None, 50.0% of Cluster Nutriscore, 47.9% of  
12  
13 Cluster MTL, 47.8% of Cluster mRIs and 44.8% of Cluster SENS (**Figure 2**).

14  
15  
16 Multivariable adjusted socio-demographic characteristics according to specific clusters are shown in  
17  
18 **Table 3**. Less educated subjects were more frequent in Cluster None and Cluster mRIs and highly  
19  
20 educated subjects in Cluster MTL (**Table 2**). Smokers were more likely in Cluster None, while never  
21  
22 smokers were more likely in Cluster Nutriscore. Subjects with low physical activity were more likely  
23  
24 in Cluster SENS and Cluster Nutriscore (**Table 2**). Finally, subjects with lower adherence to dietary  
25  
26 recommendations (Quartile 1 of mPNNS-GS) were more likely in Cluster None and Cluster  
27  
28 Nutriscore while subjects with high adherence to dietary recommendations (Quartile 4 of mPNNS-GS)  
29  
30 were more likely in Cluster mRIs and Cluster MTL (**Table 2**).

## 31 32 33 **DISCUSSION**

34  
35 Our study showed that the perception of FOP labels can be clustered according to consistent  
36  
37 preferences for specific formats. Among the proposed labels in the current French debate, the  
38  
39 Nutriscore appeared to be the most preferred format, followed by MTL. Moreover, though each cluster  
40  
41 presented marked preferences for one type of format or another, the Nutriscore appeared to reach to  
42  
43 participants beyond its specific cluster, as it was considered easy to identify and understand by a  
44  
45 significant number of participants in other clusters. Finally, socio-demographic characteristics  
46  
47 appeared to be associated with each cluster, with a specific cluster (Cluster 5, None), concentrating  
48  
49 high percentages of subjects presenting disadvantaged socio-demographic characteristics (lower levels  
50  
51 of education) and lifestyle risks (smoking, low level of physical activity and low adherence to dietary  
52  
53 recommendations).

1  
2  
3 Compared to a previous study conducted in early 2015 using a similar methodology and among  
4 participants in the same cohort study, the results of the present analyses show that the reach of the  
5 Nutriscore has somewhat broadened since then (17). The Nutriscore appeared to have a wide reach in  
6 the population, and to appeal to subjects with lower adherence to dietary recommendations. This result  
7 shows that the Nutriscore may be an effective complementary strategy to current public health  
8 nutrition policies, which promote healthy eating through widely disseminated nutritional  
9 recommendations (47). Though this strategy has led to an increase in the knowledge of nutritional  
10 recommendations, consumers somehow struggle to translate such advice into action (48;49).  
11 Disseminated nutrition information is suggested to appeal more to those already having the capacity to  
12 implement nutritional knowledge (through higher education or income), and may lead to an increase in  
13 social disparities in health (50;51). Appealing, through complementary strategies, such as FOP  
14 nutrition labels, to those lacking the potential to translate nutritional recommendations or to those to  
15 which it would most benefit therefore appears of crucial importance.  
16  
17  
18  
19  
20  
21  
22  
23  
24  
25  
26  
27  
28  
29

30 The MTL appeared as the second preferred FOP label in the population, particularly in younger  
31 subjects, with university education and lower incomes. Moreover it was considered to be providing  
32 reliable and useful information beyond its own cluster. The fact that direct numeric information on  
33 nutrient content (such as the information provided by mRIs) received a much lower support in the  
34 population shows that the appeal of the MTL is very probably associated with the colour feature of  
35 this FOP label (52), as multiple numeric information are typically considered difficult to understand  
36 (53). Indeed, compared to mRIs, the MTL only adds an interpretation of the level of nutrients using a  
37 colour-coding. However, the interpretation of the colour-coding has appeared to be challenging in  
38 certain populations (52). Indeed, MTL is a nutrient-specific FOP label, giving individual information  
39 for energy and four nutrients (sugars, fat, saturated fat and salt). Multiple nutrient-related information  
40 implies first that consumers are able to identify the nutrients that are referred to, and second, that they  
41 are able to prioritize the information provided for each nutrient (35;54). Indeed, MTL can lead to  
42 conflicting choice options: for example, the comparison between two products, with the same number  
43 of nutrients coded in 'red', but not for the same nutrients (e.g. one with a 'red' code for sugar and the  
44  
45  
46  
47  
48  
49  
50  
51  
52  
53  
54  
55  
56  
57  
58  
59  
60



1  
2  
3 other for saturated fatty acids) implies for the consumer to be able to single out one of the nutrients in  
4  
5 order to make a choice (55). These characteristics of the label may in part explain the fact that the  
6  
7 MTL appeared to appeal more particularly to young, educated subjects with a high level of adherence  
8  
9 to nutritional recommendations. This more favourable perception among these participants may stem  
10  
11 from their higher nutritional knowledge, which allows them to better interpret the label and act upon it  
12  
13 in purchasing situations (53;55). However, this specific reach in terms of population might also lead to  
14  
15 widen inequalities in health and nutrition if implemented in the overall population (56).

16  
17  
18 The SENS system was the preferred system for 17% of the population, more particularly in  
19  
20 households with children. The graphical system the SENS originated from was developed by a  
21  
22 marketing team from a retailer in September 2014, and received later support from the French  
23  
24 retailers' federation (29). As for Nutriscore or MTL, it is based on colour coding (though not based on  
25  
26 the polychromatic Green-Red scale), with the addition of recommended frequencies of consumption  
27  
28 for each level of the label. This latter feature may in part explain the higher appeal of the SENS system  
29  
30 on participants with children, as it gives a more specific guidance for consumption, which can be used  
31  
32 for children. However, these specific consumption frequencies for each level of the label could also be  
33  
34 interpreted as an oversimplification and a form of paternalism for many consumers (57). This may be  
35  
36 one of the reasons the SENS label was considered as a guilt-laden label for 21.2% of the population.

37  
38  
39 Moreover, though Nutriscore and MTL rely on the well-known polychromatic scale from green to red  
40  
41 (corresponding to recognized signals), which are easier to interpret, the SENS colour-coding does not  
42  
43 refer directly to any known colour scale (its levels are Green-Blue-Orange-Purple). Colours are  
44  
45 considered helpful to generally increase the salience of a FOP label, however, studies that have shown  
46  
47 a specific advantage of colour-coding have used readily interpretative colour-coding (57-60). In the  
48  
49 study by Bialkova et al., which used polychromatic RIs, but with no readily-interpretative colours  
50  
51 (yellow, orange, purple, blue), the polychromatic RIs indeed had lower performance than  
52  
53 monochromatic RIs (58). Therefore, beyond preference only, the use of highly interpretable colours  
54  
55 (e.g. 'Green' and 'Red') in a FOP labelling system might be an important feature of a colour coding.  
56  
57  
58  
59  
60

1  
2  
3 Finally, our study shows that a portion of the population appeared to disregard or even reject FOP  
4 nutrition labels entirely. Indeed, participants in Cluster 5 (None, corresponding to 5.1% of the  
5 population) consistently responded 'None' for all dimensions of perception that were investigated.  
6  
7 Moreover, the socio-demographic characteristics of this specific population suggested that they may in  
8 fact be more vulnerable and more at nutritional risk than the rest of the population. Indeed, this cluster  
9 included more specifically older participants, subjects with lower educational levels, current smokers  
10 and subjects with lower adherence to nutritional recommendations. This result is in line with a study in  
11 Australia showing that males and subjects with lower socio-economic status were more likely to report  
12 no preference for a FOP label (61). These results also pose a challenge to the design of efficient public  
13 health policies, as some of the subjects who would certainly benefit from them appear to reject them.  
14  
15 Novel and targeted interventions in public health nutrition should therefore be devised to appeal to this  
16 vulnerable population to entice them towards healthier diets, taking into account the broader  
17 environment related to risk behaviours (62). Alternatively, policies targeting the environment, and not  
18 depending on individual choices, such as the reformulation of existing products, may have an indirect  
19 impact on these populations (63).

20  
21  
22  
23  
24  
25  
26  
27  
28  
29  
30  
31  
32  
33  
34 Strengths of our study include its large sample size, and the use of validated dietary collection data,  
35 using repeated dietary records (33). Moreover, we were able to investigate multiple dimensions of the  
36 perception of FOP labels (awareness, liking, perceived cognitive workload and trustworthiness),  
37 across various formats that are currently proposed in the French debate on FOP nutrition labelling.  
38  
39 Finally, we were able to identify clustered preferences towards each type of format, and relate them to  
40 socio-demographic and dietary factors, which highly contributed to the interpretation of such  
41 preferences in a public health perspective.

42  
43  
44  
45  
46  
47  
48  
49 Our study is subject to some limitations. First, our sample consists of volunteer subjects included in a  
50 cohort study on nutrition, who are therefore more likely health conscious. However, our data shows a  
51 wide variety of dietary profiles, somewhat lessening the importance of this bias. Moreover, the use of  
52 weighting partially controlled for the selection bias of our study population (64). Second, our study  
53 focused on the perception of FOP labels, and not on understanding or use of FOP labels in purchasing  
54  
55  
56  
57  
58  
59  
60

1  
2  
3 situations. However, following the theoretical framework for the use of FOP nutrition labels,  
4  
5 favourable perception is a crucial pre-requisite for the efficiency of a given label (65;66).  
6

7  
8 To conclude, FOP nutrition labels could be useful strategies to tackle social inequalities in nutrition  
9  
10 and health, provided that the graphical format that is selected has a wide reach in the population. This  
11  
12 is all the more important that subjects who are more concerned about their diet (and more likely to  
13  
14 have a healthier diet), are also more likely to use a nutrition label when grocery shopping (67). As  
15  
16 such, the Nutriscore would appear as a legitimate choice for policy makers in France, as it might bring  
17  
18 subjects with lower adherence to nutritional recommendations towards healthier diets.  
19  
20  
21  
22  
23  
24  
25  
26  
27  
28  
29  
30  
31  
32  
33  
34  
35  
36  
37  
38  
39  
40  
41  
42  
43  
44  
45  
46  
47  
48  
49  
50  
51  
52  
53  
54  
55  
56  
57  
58  
59  
60

## AKNOWLEDGEMENTS

The authors especially thank Nathalie Arnault for data management, data cleaning and statistical analyses.

We especially thank Younes Esseddik, Paul Flanzky and Thi Hong Van Duong, computer scientists; Veronique Gourlet, Fabien Szabo, Nathalie Arnault, Laurent Bourhis and Stephen Besseau, statisticians; and Cédric Agaësse, Claudia Chahine, dieticians.

We warmly thank all of the dedicated and conscientious volunteers involved in the Nutrinet-Santé cohort.

**REFERENCE LIST**

1. World Health Organization. Global Health Risks: Mortality and burden of disease attributable to selected major risks. 2009. Geneva, WHO.
2. World Health Organization. Obesity: Preventing and managing the global epidemic. Report of a WHO consultation. WHO Technical Report Series 894. 2000. Geneva, WHO.
3. World Health Organization. Diet, Nutrition and the prevention of chronic diseases. Report of a joint WHO/FAO expert consultation. WHO Technical Report Series N°916. 2003. Geneva, WHO.
4. World Health Organization. Global strategy on diet, physical activity and health. 2004. Geneva, WHO.
5. Hughes R. Competencies for effective public health nutrition practice: a developing consensus. *Public Health Nutr* 2004;7:683-91.
6. Serra-Majem L. Moving forward in public health nutrition - the I World Congress of Public Health Nutrition - Introduction. *Nutrition Reviews* 2009;67:S2-S6.
7. Lachat C, Van Camp J, De Henauw S et al. A concise overview of national nutrition action plans in the European Union Member States. *Public Health Nutr* 2005;8:266-74.
8. Hercberg S, Chat-Yung S, Chauliac M. The French National Nutrition and Health Program: 2001-2006-2010. *International Journal of Public Health* 2008;53:68-77.
9. Institut National de Prévention et d'Education pour la Santé. La santé vient en mangeant. Le guide alimentaire pour tous. Paris: INPES, 2002.
10. Institut National de Prévention et d'Education pour la Santé. La santé vient en mangeant et en bougeant. Le guide nutrition des enfants et ados pour tous les parents. Paris: INPES, 2004.

- 1  
2  
3 11. Azais-Braesco V, Goffi C, Labouze E. Nutrient profiling: comparison and critical analysis of  
4 existing systems. *Public Health Nutr* 2006;9:613-22.
- 5  
6  
7  
8 12. Hercberg, S. Propositions pour un nouvel élan de la politique nutritionnelle française de santé  
9 publique dans le cadre de la stratégie nationale de santé. 1ère partie : mesures concernant la  
10 prévention nutritionnelle. 2013. Paris. 28-5-2014.
- 11  
12  
13  
14  
15 13. Journal Officiel de la République Française. JORF n°0022 du 27 janvier 2016. texte n° 1. LOI  
16 n° 2016-41 du 26 janvier 2016 de modernisation de notre système de santé. 27-1-2016. Paris,  
17 JORF.
- 18  
19  
20  
21  
22 14. Adriouch S, Julia C, Kesse-Guyot E et al. Prospective association between a dietary quality  
23 index based on a nutrient profiling system and cardiovascular disease risk. *European Journal*  
24 *of Preventive Cardiology* 2016;23:1669-76.
- 25  
26  
27  
28  
29 15. Donnenfeld M, Julia C, Kesse-Guyot E et al. Prospective association between cancer risk and  
30 an individual dietary index based on the British Food Standards Agency Nutrient Profiling  
31 System. *Br J Nutr* 2015;114:1702-10.
- 32  
33  
34  
35  
36 16. Ducrot P, Mejean C, Julia C et al. Objective Understanding of Front-of-Package Nutrition  
37 Labels among Nutritionally At-Risk Individuals. *Nutrients* 2015;7:7106-25.
- 38  
39  
40  
41 17. Ducrot P, Mejean C, Julia C et al. Effectiveness of Front-Of-Pack Nutrition Labels in French  
42 Adults: Results from the NutriNet-Sante Cohort Study. *Plos One* 2015;10:e0140898.
- 43  
44  
45  
46 18. Ducrot P, Julia C, Mejean C et al. Impact of Different Front-of-Pack Nutrition Labels on  
47 Consumer Purchasing Intentions A Randomized Controlled Trial. *Am J Prev Med*  
48 2016;50:627-36.
- 49  
50  
51  
52  
53 19. Julia C, Touvier M, Mejean C et al. Development and validation of an individual dietary index  
54 based on the British Food Standard Agency nutrient profiling system in a French context. *J*  
55 *Nutr* 2014;144:2009-17.
- 56  
57  
58  
59  
60

- 1  
2  
3 20. Julia C, Ducrot P, Peneau S et al. Discriminating nutritional quality of foods using the 5-Color  
4 nutrition label in the French food market: consistency with nutritional recommendations. *Nutr*  
5 *J* 2015;14:100.  
6  
7  
8
- 9  
10 21. Julia C, Ducrot P, Lassale C et al. Prospective associations between a dietary index based on  
11 the British Food Standard Agency nutrient profiling system and 13-year weight gain in the  
12 SU.VI.MAX cohort. *Prev Med* 2015;81:189-94.  
13  
14  
15
- 16  
17 22. Julia C, Kesse-Guyot E, Ducrot P et al. Performance of a five category front-of-pack labelling  
18 system - the 5-colour nutrition label - to differentiate nutritional quality of breakfast cereals in  
19 France. *BMC Public Health* 2015;15:179.  
20  
21  
22
- 23  
24 23. Julia C, Fezeu LK, Ducrot P et al. The Nutrient Profile of Foods Consumed Using the British  
25 Food Standards Agency Nutrient Profiling System Is Associated with Metabolic Syndrome in  
26 the SU.VI.MAX Cohort. *J Nutr* 2015;145:2355-61.  
27  
28  
29
- 30  
31 24. Julia C, Mejean C, Touvier M et al. Validation of the FSA nutrient profiling system dietary  
32 index in French adults-findings from SUVIMAX study. *Eur J Nutr* 2016;55:1901-10.  
33  
34  
35
- 36  
37 25. Julia C, Kesse-Guyot E, Touvier M, Mejean C, Fezeu L, Hercberg S. Application of the  
38 British Food Standards Agency nutrient profiling system in a French food composition  
39 database. *The British journal of nutrition* 2014;112:1699-705.  
40  
41  
42
- 43  
44 26. Julia C, Blanchet O, Mejean C et al. Impact of the front-of-pack 5-colour nutrition label (5-  
45 CNL) on the nutritional quality of purchases: an experimental study. *International Journal of*  
46 *Behavioral Nutrition and Physical Activity* 2016;13:1-9.  
47  
48  
49
- 50  
51 27. ANSES. Evaluation de la faisabilité du calcul d'un score nutritionnel tel qu'élaboré par Rayner  
52 et al. Rapport d'appui scientifique et technique. 2015. Maison Alfort, ANSES. 9-11-2015.  
53  
54
- 55  
56 28. Haut Conseil de la Santé Publique. Avis relatif à l'information sur la qualité nutritionnelle des  
57 produits alimentaires. 2015. Paris, HCSP. 9-11-2015.  
58  
59  
60

- 1  
2  
3 29. Julia C, Hercberg S. Research and lobbying conflicting on the issue of a front-of-pack  
4 nutrition labelling in France. *Archives of Public Health* 2016;74:51.  
5  
6  
7  
8 30. Crosetto P, Muller L, Ruffieux B. Réponse des consommateurs à trois systèmes d'étiquetage  
9 nutritionnel face avant. *Cahiers de Nutrition et de Diététique* 2016;51:124-31.  
10  
11  
12  
13 31. Hercberg S, Castetbon K, Czernichow S et al. The Nutrinet-Sante Study: a web-based  
14 prospective study on the relationship between nutrition and health and determinants of dietary  
15 patterns and nutritional status. *Bmc Public Health* 2010;10.  
16  
17  
18  
19  
20 32. Touvier M, Mejean C, Kesse-Guyot E et al. Comparison between web-based and paper  
21 versions of a self-administered anthropometric questionnaire. *Eur J Epidemiol* 2010;25:287-  
22 96.  
23  
24  
25  
26  
27 33. Touvier M, Kesse-Guyot E, Mejean C et al. Comparison between an interactive web-based  
28 self-administered 24 h dietary record and an interview by a dietitian for large-scale  
29 epidemiological studies. *Br J Nutr* 2011;105:1055-64.  
30  
31  
32  
33  
34 34. Vergnaud AC, Touvier M, Mejean C et al. Agreement between web-based and paper versions  
35 of a socio-demographic questionnaire in the NutriNet-Sante study. *Int J Public Health*  
36 2011;56:407-17.  
37  
38  
39  
40  
41 42 35. Mejean C, Macouillard P, Peneau S, Hercberg S, Castetbon K. Consumer acceptability and  
43 understanding of front-of-pack nutrition labels. *Journal of Human Nutrition and Dietetics*  
44 2013;26:494-503.  
45  
46  
47  
48 49 36. INSEE (Institut National de la Statistique et des Etudes Economiques). Méthodes. 2014. 17-  
50 3-2014.  
51  
52  
53 54 37. Craig CL, Marshall AL, Sjostrom M et al. International physical activity questionnaire: 12-  
55 country reliability and validity. *Med Sci Sports Exerc* 2003;35:1381-95.  
56  
57  
58  
59  
60



- 1  
2  
3 38. Hercberg S, Deheeger M, Preziosi P. SU.VI.MAX Portions alimentaires. Manuel photos pour  
4 l'estimation des quantités. Paris: Editions polytechnica, 2002.
- 5  
6  
7  
8 39. Etude Nutrinet-Santé. Table de composition des aliments de l'étude Nutrinet-Santé. Paris:  
9 Economica, 2013.
- 10  
11  
12  
13 40. Black AE. Critical evaluation of energy intake using the Goldberg cut-off for energy  
14 intake:basal metabolic rate. A practical guide to its calculation, use and limitations. Int J Obes  
15 Relat Metab Disord 2000;24:1119-30.
- 16  
17  
18  
19  
20 41. Lassale C, Galan P, Julia C, Fezeu L, Hercberg S, Kesse-Guyot E. Association between  
21 adherence to nutritional guidelines, the metabolic syndrome and adiposity markers in a French  
22 adult general population. Plos One 2013;8:e76349.
- 23  
24  
25  
26  
27 42. Lassale C, Peneau S, Touvier M et al. Validity of web-based self-reported weight and height:  
28 results of the Nutrinet-Sante study. J Med Internet Res 2013;15:e152.
- 29  
30  
31  
32 43. INSEE (Institut National de la Statistique et des Etudes Economiques). La macro SAS  
33 CALMAR. 2016. 19-12-2016.
- 34  
35  
36  
37 44. Estaquio C, Kesse-Guyot E, Deschamps V et al. Adherence to the French Programme  
38 National Nutrition Sante Guideline Score Is Associated with Better Nutrient Intake and  
39 Nutritional Status. J Am Diet Assoc 2009;109:1031-41.
- 40  
41  
42  
43  
44 45. Assmann KE, Lassale C, Galan P, Hercberg S, Kesse-Guyot E. Dietary Quality and 6-Year  
45 Anthropometric Changes in a Sample of French Middle-Aged Overweight and Obese Adults.  
46 Plos One 2014;9.
- 47  
48  
49  
50  
51 46. Schofield WN. Predicting basal metabolic rate, new standards and review of previous work.  
52 Hum Nutr Clin Nutr 1985;39 Suppl 1:5-41.
- 53  
54  
55  
56  
57  
58  
59  
60

- 1  
2  
3 47. Hercberg S, Chat-Yung S, Chauliac M. The French National Nutrition and Health Program:  
4 2001-2006-2010. *Int J Public Health* 2008;53:68-77.  
5  
6  
7  
8 48. Escalon H, Beck F, Bossard C. Associations entre la connaissance des recommandations du  
9 Programme national nutrition santé et les comportements en matière d'alimentation et  
10 d'activité physique. *Revue d'épidémiologie et de Santé Publique* 2013;61:37-47.  
11  
12  
13  
14  
15 49. Worsley A. Nutrition knowledge and food consumption: can nutrition knowledge change food  
16 behaviour? *Asia Pacific Journal of Clinical Nutrition* 2002;11:S579-S585.  
17  
18  
19  
20 50. Backholer K, Beauchamp A, Ball K et al. A Framework for Evaluating the Impact of Obesity  
21 Prevention Strategies on Socioeconomic Inequalities in Weight. *Am J Public Health*  
22 2014;104:E43-E50.  
23  
24  
25  
26  
27 51. Beauchamp A, Backholer K, Magliano D, Peeters A. The effect of obesity prevention  
28 interventions according to socioeconomic position: a systematic review. *Obesity Reviews*  
29 2014;15:541-54.  
30  
31  
32  
33  
34 52. Hawley KL, Roberto CA, Bragg MA, Liu PJ, Schwartz MB, Brownell KD. The science on  
35 front-of-package food labels. *Public Health Nutrition* 2013;16:430-9.  
36  
37  
38  
39 53. Campos S, Doxey J, Hammond D. Nutrition labels on pre-packaged foods: a systematic  
40 review. *Public Health Nutrition* 2011;14:1496-506.  
41  
42  
43  
44 54. Mejean C, Macouillard P, Peneau S, Hercberg S, Castetbon K. Perception of front-of-pack  
45 labels according to social characteristics, nutritional knowledge and food purchasing habits.  
46 *Public Health Nutrition* 2013;16:392-402.  
47  
48  
49  
50  
51 55. Cowburn G, Stockley L. Consumer understanding and use of nutrition labelling: a systematic  
52 review. *Public Health Nutrition* 2005;8:21-8.  
53  
54  
55  
56  
57  
58  
59  
60

- 1  
2  
3 56. Frohlich KL, Potvin L. Transcending the known in public health practice: the inequality  
4 paradox: the population approach and vulnerable populations. *Am J Public Health*  
5 2008;98:216-21.  
6  
7  
8  
9  
10 57. van HE, Trijp HC. Front-of-pack nutrition labels. Their effect on attention and choices when  
11 consumers have varying goals and time constraints. *Appetite* 2011;57:148-60.  
12  
13  
14 58. Bialkova S, van Trijp H. What determines consumer attention to nutrition labels? *Food*  
15 *Quality and Preference* 2010;21:1042-51.  
16  
17  
18  
19  
20 59. Jones G, Richardson M. An objective examination of consumer perception of nutrition  
21 information based on healthiness ratings and eye movements. *Public Health Nutrition*  
22 2007;10:238-44.  
23  
24  
25  
26  
27 60. Kelly B, Hughes C, Chapman K et al. Consumer testing of the acceptability and effectiveness  
28 of front-of-pack food labelling systems for the Australian grocery market. *Health Promotion*  
29 *International* 2009;24:120-9.  
30  
31  
32  
33  
34 61. Pettigrew S, Talati Z, Miller C, Dixon H, Kelly B, Ball K. The types and aspects of front-of-  
35 pack food labelling schemes preferred by adults and children. *Appetite* 2016;109:115-23.  
36  
37  
38  
39 62. Pampel FC, Krueger PM, Denney JT. Socioeconomic Disparities in Health Behaviors. *Annu*  
40 *Rev Sociol* 2010;36:349-70.  
41  
42  
43  
44 63. Story M, Kaphingst KM, Robinson-O'Brien R, Glanz K. Creating healthy food and eating  
45 environments: Policy and environmental approaches. PALO ALTO: ANNUAL REVIEWS,  
46 2008.  
47  
48  
49  
50  
51 64. Andreeva VA, Salanave B, Castetbon K et al. Comparison of the sociodemographic  
52 characteristics of the large NutriNet-Sante e-cohort with French Census data: the issue of  
53 volunteer bias revisited. *J Epidemiol Community Health* 2015;69:893-8.  
54  
55  
56  
57  
58  
59  
60

- 1  
2  
3 65. Grunert KG, Wills JM. A review of European research on consumer response to nutrition  
4 information on food labels. *J Public Health* 2007;15:385-99.  
5  
6  
7  
8 66. Grunert KG, Fernandez-Celemin L, Wills JM, Storcksdieck Genannt BS, Nureeva L. Use and  
9 understanding of nutrition information on food labels in six European countries. *Z Gesundh*  
10 *Wiss* 2010;18:261-77.  
11  
12  
13  
14  
15 67. Van Kleef E, Dagevos H. The Growing Role of Front-of-Pack Nutrition Profile Labeling: A  
16 Consumer Perspective on Key Issues and Controversies. *Crit Rev Food Sci Nutr* 2015;55:291-  
17 303.  
18  
19  
20  
21  
22  
23  
24  
25  
26  
27  
28  
29  
30  
31  
32  
33  
34  
35  
36  
37  
38  
39  
40  
41  
42  
43  
44  
45  
46  
47  
48  
49  
50  
51  
52  
53  
54  
55  
56  
57  
58  
59  
60

## FIGURE LEGENDS

**Figure 1:** Formats proposed for a front-of-pack nutrition label in France.

Caption:

Nutriscore developed by the EREN research team, is based on the British Food Standards Agency nutrient profiling system and presents for each food or beverage the overall nutritional quality on a five-point colour-code scale from Green to Red.

SENS, supported by retailers, is based on a nutrient profiling system developed by a research team, and presents for each food or beverage a recommended frequency of consumption, with a four points colour-coded scale (Green, Blue, Orange, Purple)

Multiple Traffic Lights, supported by industry, and implemented in Great Britain since 2005 presents the numeric values of the contribution of a portion of the food to the intakes in a balanced diet (in grams and percentage of reference intakes, corresponding to the reference intakes label, RI) for energy, fats, saturated fats, sugar and sodium, with a colour-coding (Green, Amber and Red) for each of these components of the food

Modified Reference Intakes (mRIs) present the numeric values of the reference intakes, in both grams and percentage of reference intakes, with bars varying in height depending on the amount of the component in the food.

**Figure 2:** Responses to each of the dimensions of perception in the various clusters

Caption: Each circle represents a cluster, each response to a dimension is scaled within the cluster.

Positive dimensions are situated on the right hand side of the figure, while negative dimensions are situated on the left hand side of the figure

Table 1 Characteristics of the study population, crude and after weighting

|                                    |                             | Crude |       | Weighted |
|------------------------------------|-----------------------------|-------|-------|----------|
|                                    |                             | n     | %     | %        |
| <b>Sex</b>                         |                             |       |       |          |
|                                    | Men                         | 5768  | 26.58 | 39.97    |
|                                    | Women                       | 15934 | 73.42 | 60.03    |
| <b>Age</b>                         |                             |       |       |          |
|                                    | 18-29 years-old             | 968   | 4.46  | 12.28    |
|                                    | 30-49 years-old             | 5900  | 27.19 | 31.05    |
|                                    | 50-64 years-old             | 7899  | 36.40 | 29.39    |
|                                    | ≥ 65 years old              | 6935  | 31.96 | 27.28    |
| <b>Educational level</b>           |                             |       |       |          |
|                                    | Up to secondary             | 6804  | 31.35 | 70.54    |
|                                    | University, up to two years | 6750  | 31.10 | 13.86    |
|                                    | University, ≥ 3 years       | 8148  | 37.54 | 15.60    |
| <b>Income per consumption unit</b> |                             |       |       |          |
|                                    | <1200/month                 | 2068  | 9.53  | 20.28    |
|                                    | [1200 - 1800[ €/month       | 4766  | 21.96 | 30.24    |
|                                    | [1800 - 2700[ €/month       | 6514  | 30.02 | 28.67    |
|                                    | ≥ 2700 €/month              | 8354  | 38.49 | 20.81    |
| <b>Household composition</b>       |                             |       |       |          |
|                                    | Adults only                 | 17118 | 78.88 | 78.05    |
|                                    | Adults and children         | 4584  | 21.12 | 21.95    |
| <b>Smoking status</b>              |                             |       |       |          |
|                                    | Current smoker              | 1923  | 8.86  | 10.16    |
|                                    | Former smoker               | 8710  | 40.13 | 39.81    |
|                                    | Never smoker                | 11069 | 51.00 | 50.03    |
| <b>Physical activity level</b>     |                             |       |       |          |
|                                    | High                        | 8007  | 36.90 | 39.01    |
|                                    | Moderate                    | 9128  | 42.06 | 37.28    |
|                                    | Low                         | 4567  | 21.04 | 23.72    |
| <b>mPNNS-GS</b>                    |                             |       |       |          |
|                                    | Quartile 1                  | 5425  | 25.00 | 23.70    |
|                                    | Quartile 2                  | 5582  | 25.72 | 23.86    |
|                                    | Quartile 3                  | 5933  | 27.34 | 26.20    |
|                                    | Quartile 4                  | 4762  | 21.94 | 26.24    |

Weighting was obtained using the SAS CALMAR Macro

Table 2 Crude percentage of responses to the dimensions of perception of FOP labels

|                                                        | Nutriscore | MTL   | SENS  | GDA   | None  |
|--------------------------------------------------------|------------|-------|-------|-------|-------|
| This FOP label is helpful to choose healthier products | 40.02      | 26.93 | 17.33 | 9.14  | 6.57  |
| I want to see this FOP label on the front of packages  | 44.22      | 25.15 | 17.15 | 7.43  | 6.05  |
| This is my preferred FOP label                         | 43.79      | 24.92 | 17.17 | 6.68  | 7.45  |
| This FOP label provides me with the information I need | 24.51      | 43.06 | 15.78 | 11.44 | 5.21  |
| This FOP label is trustworthy                          | 37.64      | 28.83 | 15.23 | 8.52  | 9.79  |
| This FOP label provides reliable information           | 26.76      | 40.32 | 10.55 | 11.75 | 10.62 |
| This FOP label is easy to identify                     | 62.53      | 8.78  | 21.37 | 2.75  | 4.56  |
| This label is easy to understand                       | 52.22      | 7.86  | 33.5  | 3.43  | 2.99  |
| This FOP label is quick to process                     | 64.09      | 8.07  | 22.27 | 2.9   | 2.68  |
| This FOP label is too complex for understanding        | 4.49       | 19.9  | 5.7   | 48.22 | 21.7  |
| This FOP label takes too long to understand            | 2.52       | 25.45 | 2.86  | 50.81 | 18.36 |
| This is the FOP label I appreciate the least           | 9.67       | 12.58 | 17.44 | 51.33 | 8.98  |
| This FOP label is guilt-laden                          | 12.42      | 9.32  | 21.19 | 6.83  | 50.23 |

Table 3 Multivariable adjusted socio-demographic, lifestyle and dietary characteristics according to the various clusters of preference for FOP nutrition labeling

|                                    |                       | Nutriscore   | MTL          | SENS         | GDA          | None         | P       |
|------------------------------------|-----------------------|--------------|--------------|--------------|--------------|--------------|---------|
|                                    |                       | 43.23        | 27.31        | 17.05        | 7.31         | 5.10         |         |
| <b>Sex</b>                         |                       |              |              |              |              |              | <0,0001 |
|                                    | Men                   | <b>41.88</b> | 37.23        | 37.48        | <b>35.67</b> | 40.14        |         |
|                                    | Women                 | 58.12        | 62.77        | 62.52        | 64.33        | 59.86        |         |
| <b>Age</b>                         |                       |              |              |              |              |              | <0,0001 |
|                                    | 18-29 years-old       | 11.11        | <b>13.90</b> | 11.06        | 11.82        | 3.93         |         |
|                                    | 30-49 years-old       | 64.66        | 68.43        | 67.53        | 66.86        | 64.92        |         |
|                                    | 50-64 years-old       | 21.40        | 15.86        | 19.04        | 18.05        | 25.76        |         |
|                                    | ≥ 65 years old        | 2.84         | 1.81         | 2.37         | 3.27         | <b>5.40</b>  |         |
| <b>Educational level</b>           |                       |              |              |              |              |              | <0,0001 |
|                                    | Up to secondary       | 72.64        | 67.59        | 72.05        | 77.71        | <b>77.84</b> |         |
|                                    | University, up to two | 15.26        | 16.81        | 15.72        | 12.79        | 12.21        |         |
|                                    | years                 | 12.09        | <b>15.61</b> | 12.23        | 9.50         | 9.95         |         |
|                                    | University, ≥ 3 years |              |              |              |              |              |         |
| <b>Income per consumption unit</b> |                       |              |              |              |              |              | <0,0001 |
|                                    | <1200/month           | 14.57        | <b>20.07</b> | 16.36        | 17.17        | 13.95        |         |
|                                    | [1200 - 1800[ €/month | 32.61        | 31.47        | 35.57        | 35.71        | 36.83        |         |
|                                    | [1800 - 2700[ €/month | 30.96        | 29.29        | 29.41        | 29.17        | 30.45        |         |
|                                    | ≥ 2700 €/month        | <b>21.85</b> | 19.16        | 18.66        | 17.96        | 18.77        |         |
| <b>Household composition</b>       |                       |              |              |              |              |              | <0,0001 |
|                                    | Adults only           | 87.76        | 88.57        | 86.99        | 88.60        | <b>90.35</b> |         |
|                                    | Adults and children   | 12.24        | 11.43        | <b>13.01</b> | 11.40        | 9.65         |         |
| <b>Smoking status</b>              |                       |              |              |              |              |              | <0,0001 |
|                                    | Current smoker        | 10.91        | 11.33        | 9.94         | 9.35         | <b>15.59</b> |         |
|                                    | Former smoker         | 31.74        | 34.95        | 34.21        | 35.63        | 32.69        |         |
|                                    | Never smoker          | <b>57.35</b> | 53.72        | 55.85        | 55.02        | 51.73        |         |
| <b>Physical activity level</b>     |                       |              |              |              |              |              | <0,0001 |
|                                    | High                  | 31.73        | 34.19        | 31.12        | <b>35.93</b> | 29.38        |         |
|                                    | Moderate              | 40.97        | 44.91        | 41.20        | 41.62        | 43.90        |         |
|                                    | Low                   | 27.30        | 20.90        | <b>27.68</b> | 22.44        | 26.71        |         |
| <b>mPNNS-GS</b>                    |                       |              |              |              |              |              | <0,0001 |
|                                    | Quartile 1            | 28.28        | 25.09        | 23.90        | 21.63        | <b>32.47</b> |         |
|                                    | Quartile 2            | 25.90        | 22.09        | 26.67        | 20.08        | 30.08        |         |
|                                    | Quartile 3            | 26.86        | 28.44        | 26.96        | 30.87        | 21.86        |         |
|                                    | Quartile 4            | 18.96        | 24.37        | 22.47        | 27.42        | <b>15.59</b> |         |

Mutually adjusted percentages obtained with multinomial regression



Figure 1

Nutriscore

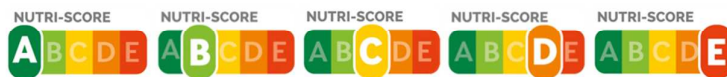

SENS

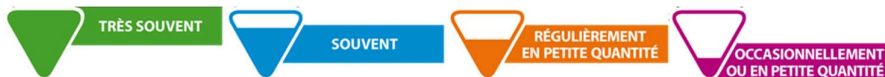

Modified Reference Intakes

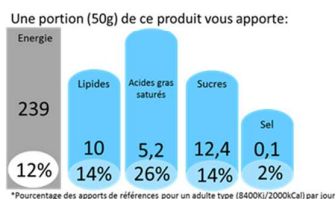

Multiple Traffic Lights

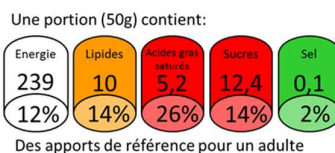

Review only

Figure 2

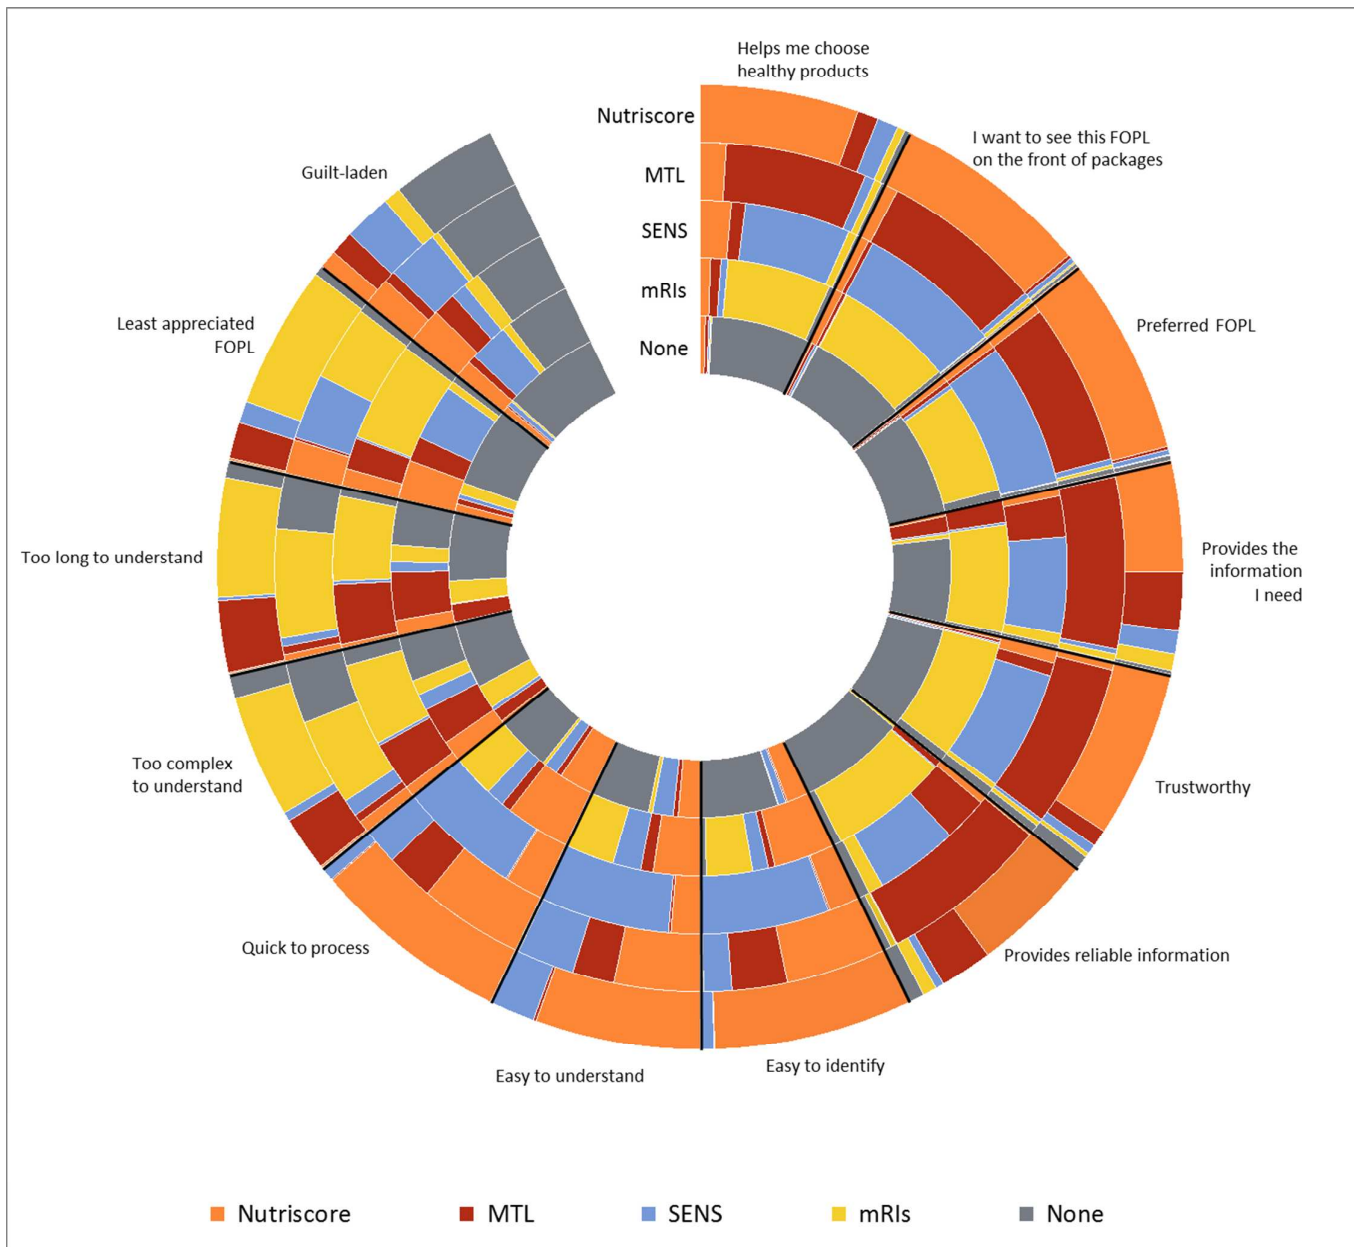

1  
2  
3  
4  
5  
6  
7  
8  
9  
10  
11  
12  
13  
14  
15  
16  
17  
18  
19  
20  
21  
22  
23  
24  
25  
26  
27  
28  
29  
30  
31  
32  
33  
34  
35  
36  
37  
38  
39  
40  
41  
42  
43  
44  
45  
46  
47  
48  
49  
50  
51  
52  
53  
54  
55  
56  
57  
58  
59  
60

## Online Supplemental material

**Supplemental Table 1 Questionnaire used to assess perception of the various FOP nutrition labels (French version and English translation)**

| Question (English Translation)                         | Question (Original question in French)                      |
|--------------------------------------------------------|-------------------------------------------------------------|
| This FOP label is helpful to choose healthier products | Ce logo aide à choisir des produits meilleurs pour la santé |
| I want to see this FOP label on the front of packages  | Je veux qu'il soit présent sur les emballages               |
| This is my preferred FOP label                         | C'est mon logo préféré                                      |
| This is the FOP label I appreciate the least           | C'est le logo que j'aime le moins                           |
| This FOP label provides me with the information I need | Ce logo m'apporte l'information dont j'ai besoin            |
| This FOP label is trustworthy                          | Ce logo m'inspire confiance                                 |
| This FOP label provides reliable information           | Ce logo permet d'avoir une information fiable               |
| This FOP label is easy to identify                     | Ce logo est facile à repérer                                |
| This label is easy to understand                       | Ce logo est facile à comprendre                             |
| This FOP label is quick to process                     | Ce logo permet d'avoir une information rapide               |
| This FOP label is too complex for understanding        | Ce logo est trop compliqué à comprendre                     |
| This FOP label takes too long to understand            | Ce logo est trop long à comprendre                          |
| This FOP label is guilt-laden                          | Ce logo est culpabilisant                                   |

Online Supplemental material

Supplemental Table 2 responses to perception questions according clusters of preference for FOP nutrition labeling

Liking

|                                                        | Nutriscore | MTL   | SENS  | mRIs  | None  |
|--------------------------------------------------------|------------|-------|-------|-------|-------|
| This FOP label is helpful to choose healthier products |            |       |       |       |       |
| Nutriscore                                             | 74.32      | 13.93 | 19.21 | 7.81  | 4.84  |
| SENS                                                   | 9.91       | 5.45  | 65.23 | 4.96  | 1.54  |
| MTL                                                    | 9.78       | 75.12 | 8.65  | 7.54  | 3.2   |
| mRIs                                                   | 3.64       | 3.86  | 5.23  | 76.19 | 1.03  |
| None                                                   | 2.36       | 1.64  | 1.68  | 3.51  | 89.4  |
| I want to see this FOP label on the front of packages  |            |       |       |       |       |
| Nutriscore                                             | 93.45      | 7.64  | 6.32  | 6.89  | 3.1   |
| SENS                                                   | 2.34       | 2.99  | 88.89 | 0.66  | 2.35  |
| MTL                                                    | 1.73       | 86.27 | 2.92  | 2.75  | 2.73  |
| mRIs                                                   | 0.82       | 2.21  | 0.59  | 86.66 | 0.81  |
| None                                                   | 1.66       | 0.89  | 1.28  | 3.04  | 91    |
| This is my preferred FOP label                         |            |       |       |       |       |
| Nutriscore                                             | 93.51      | 6.24  | 6.18  | 5.94  | 3.33  |
| SENS                                                   | 2.3        | 3.12  | 88.31 | 2.9   | 1.05  |
| MTL                                                    | 1.53       | 86.06 | 2.54  | 3.23  | 1.7   |
| mRIs                                                   | 0.33       | 1.84  | 0.42  | 81.23 | 0.47  |
| None                                                   | 2.33       | 2.74  | 2.55  | 6.7   | 93.45 |
| This is the FOP label I appreciate the least           |            |       |       |       |       |
| Nutriscore                                             | 1.08       | 17.92 | 10.9  | 28.78 | 6.79  |
| SENS                                                   | 10.36      | 34.9  | 1.31  | 41.12 | 3.96  |
| MTL                                                    | 16.91      | 1.51  | 19.14 | 18.16 | 5.23  |
| mRIs                                                   | 66.88      | 39.88 | 61.86 | 5.85  | 10.78 |
| None                                                   | 4.77       | 5.78  | 6.78  | 6.09  | 73.24 |

1  
2  
3 Online Supplemental material  
4  
5

6 **Awareness and trustworthiness**

7

|                                                          | Nutriscore | MTL   | SENS  | mRIs  | None  |
|----------------------------------------------------------|------------|-------|-------|-------|-------|
| 8 This FOP label provides me with the information I need |            |       |       |       |       |
| 9 Nutriscore                                             | 52.36      | 2.01  | 6.25  | 0.56  | 4.21  |
| 10 SENS                                                  | 10.83      | 2.66  | 59.59 | 1.74  | 1.71  |
| 11 MTL                                                   | 27.37      | 91.49 | 25.14 | 16.79 | 14.24 |
| 12 mRIs                                                  | 7.78       | 3.58  | 6.87  | 78.6  | 3.66  |
| 13 None                                                  | 1.67       | 0.25  | 2.16  | 2.31  | 76.17 |
| 14                                                       |            |       |       |       |       |
| 15 This FOP label is trustworthy                         |            |       |       |       |       |
| 16 Nutriscore                                            | 79.33      | 4.82  | 9.29  | 3.48  | 3.67  |
| 17 SENS                                                  | 4.55       | 1.79  | 74.04 | 0.98  | 1.5   |
| 18 MTL                                                   | 7.98       | 87.15 | 8.04  | 1.98  | 1.21  |
| 19 mRIs                                                  | 1.96       | 2.43  | 3.35  | 87.89 | 0.28  |
| 20 None                                                  | 6.18       | 3.81  | 5.29  | 5.67  | 93.34 |
| 21                                                       |            |       |       |       |       |
| 22 This FOP label provides reliable information          |            |       |       |       |       |
| 23 Nutriscore                                            | 57.78      | 2.37  | 5.76  | 1.95  | 0.23  |
| 24 SENS                                                  | 3.92       | 0.48  | 50.74 | 0.88  | 0.12  |
| 25 MTL                                                   | 24.47      | 90.22 | 27.44 | 4.67  | 1.53  |
| 26 mRIs                                                  | 6.54       | 3.18  | 9.22  | 87.05 | 2.36  |
| 27 None                                                  | 7.29       | 3.75  | 6.84  | 5.45  | 95.75 |
| 28                                                       |            |       |       |       |       |
| 29 This FOP label is easy to identify                    |            |       |       |       |       |
| 30 Nutriscore                                            | 93.08      | 53.69 | 19.15 | 45.28 | 20.69 |
| 31 SENS                                                  | 6.03       | 15.02 | 79.02 | 11.56 | 6.82  |
| 32 MTL                                                   | 0.34       | 29.44 | 0.99  | 4.83  | 1.41  |
| 33 mRIs                                                  | 0.08       | 0.6   | 0.32  | 33.66 | 0.78  |
| 34 None                                                  | 0.47       | 1.25  | 0.53  | 4.68  | 70.29 |
| 35                                                       |            |       |       |       |       |
| 36                                                       |            |       |       |       |       |
| 37                                                       |            |       |       |       |       |
| 38                                                       |            |       |       |       |       |
| 39                                                       |            |       |       |       |       |
| 40                                                       |            |       |       |       |       |
| 41                                                       |            |       |       |       |       |
| 42                                                       |            |       |       |       |       |
| 43                                                       |            |       |       |       |       |
| 44                                                       |            |       |       |       |       |
| 45                                                       |            |       |       |       |       |
| 46                                                       |            |       |       |       |       |
| 47                                                       |            |       |       |       |       |
| 48                                                       |            |       |       |       |       |
| 49                                                       |            |       |       |       |       |

1  
2  
3 Online Supplemental material  
4

5 **Perceived cognitive workload**

|                                                    | Nutriscore | MTL   | SENS  | mRIs  | None  |
|----------------------------------------------------|------------|-------|-------|-------|-------|
| 8 This label is easy to understand                 |            |       |       |       |       |
| 9 Nutriscore                                       | 77.11      | 45.5  | 17.55 | 33.92 | 19.4  |
| 10 SENS                                            | 20.75      | 30.45 | 80.77 | 20.47 | 18.54 |
| 11 MTL                                             | 1.41       | 22.27 | 1.58  | 9.16  | 4.46  |
| 12 mRIs                                            | 0.51       | 1.46  | 0.09  | 35.6  | 3.72  |
| 13 None                                            | 0.22       | 0.33  | 0     | 0.85  | 53.88 |
| 14 This FOP label is quick to process              |            |       |       |       |       |
| 15 Nutriscore                                      | 92.72      | 55.07 | 23.2  | 47.31 | 30.42 |
| 16 SENS                                            | 6.18       | 18.75 | 75.65 | 13.43 | 11.67 |
| 17 MTL                                             | 0.62       | 25.17 | 0.75  | 7.31  | 5.22  |
| 18 mRIs                                            | 0.38       | 0.88  | 0.39  | 31.18 | 2.88  |
| 19 None                                            | 0.1        | 0.12  | 0.01  | 0.78  | 49.82 |
| 20 This FOP label is too complex for understanding |            |       |       |       |       |
| 21 Nutriscore                                      | 0.99       | 6.38  | 6.36  | 14.98 | 2.75  |
| 22 SENS                                            | 4.23       | 9.09  | 1.86  | 12.2  | 3.51  |
| 23 MTL                                             | 25.49      | 4.24  | 30.07 | 27.56 | 11.35 |
| 24 mRIs                                            | 57.73      | 46.53 | 50.78 | 10.9  | 21.55 |
| 25 None                                            | 11.56      | 33.77 | 10.92 | 34.35 | 60.84 |
| 26 This FOP label takes too long to understand     |            |       |       |       |       |
| 27 Nutriscore                                      | 0.77       | 3.45  | 2.37  | 11.12 | 0.65  |
| 28 SENS                                            | 1.57       | 4.47  | 2.19  | 7.43  | 0.81  |
| 29 MTL                                             | 33.71      | 4.33  | 36.95 | 35.12 | 16.19 |
| 30 mRIs                                            | 55.76      | 58.12 | 52.13 | 12.73 | 19.83 |
| 31 None                                            | 8.19       | 29.63 | 6.36  | 33.6  | 62.51 |
| 32 This FOP label is guilt-laden                   |            |       |       |       |       |
| 33 Nutriscore                                      | 8.33       | 14.8  | 21.33 | 12.13 | 4.97  |
| 34 SENS                                            | 22.37      | 27.72 | 9.68  | 28.3  | 4.59  |
| 35 MTL                                             | 11.15      | 5.87  | 14.04 | 5.84  | 1.59  |
| 36 mRIs                                            | 8.23       | 3.73  | 10.16 | 5.93  | 1.73  |
| 37 None                                            | 49.93      | 47.89 | 44.78 | 47.8  | 87.12 |

Nutriscore

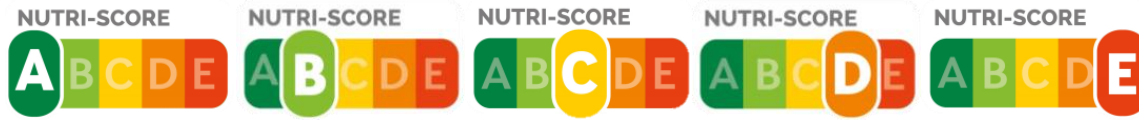

SENS

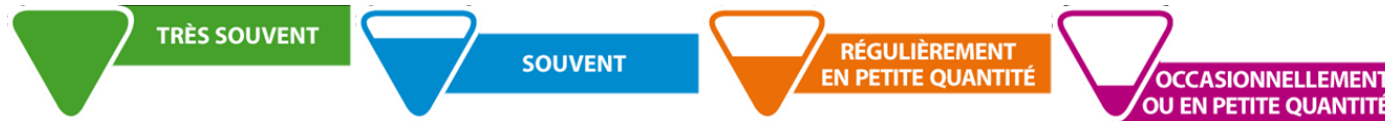

Modified Reference Intakes

Une portion (50g) de ce produit vous apporte:

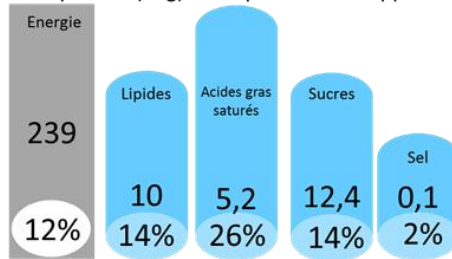

\*Pourcentage des apports de références pour un adulte type (8400Kj/2000kCal) par jour

Multiple Traffic Lights

Une portion (50g) contient:

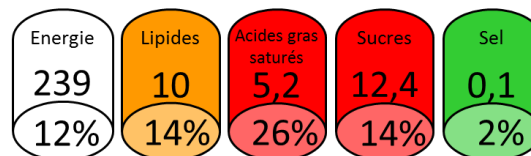

# BMJ Open

1  
2  
3  
4  
5  
6  
7  
8  
9  
10  
11  
12  
13  
14  
15  
16  
17  
18  
19  
20  
21  
22  
23  
24  
25  
26  
27  
28  
29  
30  
31  
32  
33  
34  
35  
36  
37  
38  
39  
40  
41  
42  
43

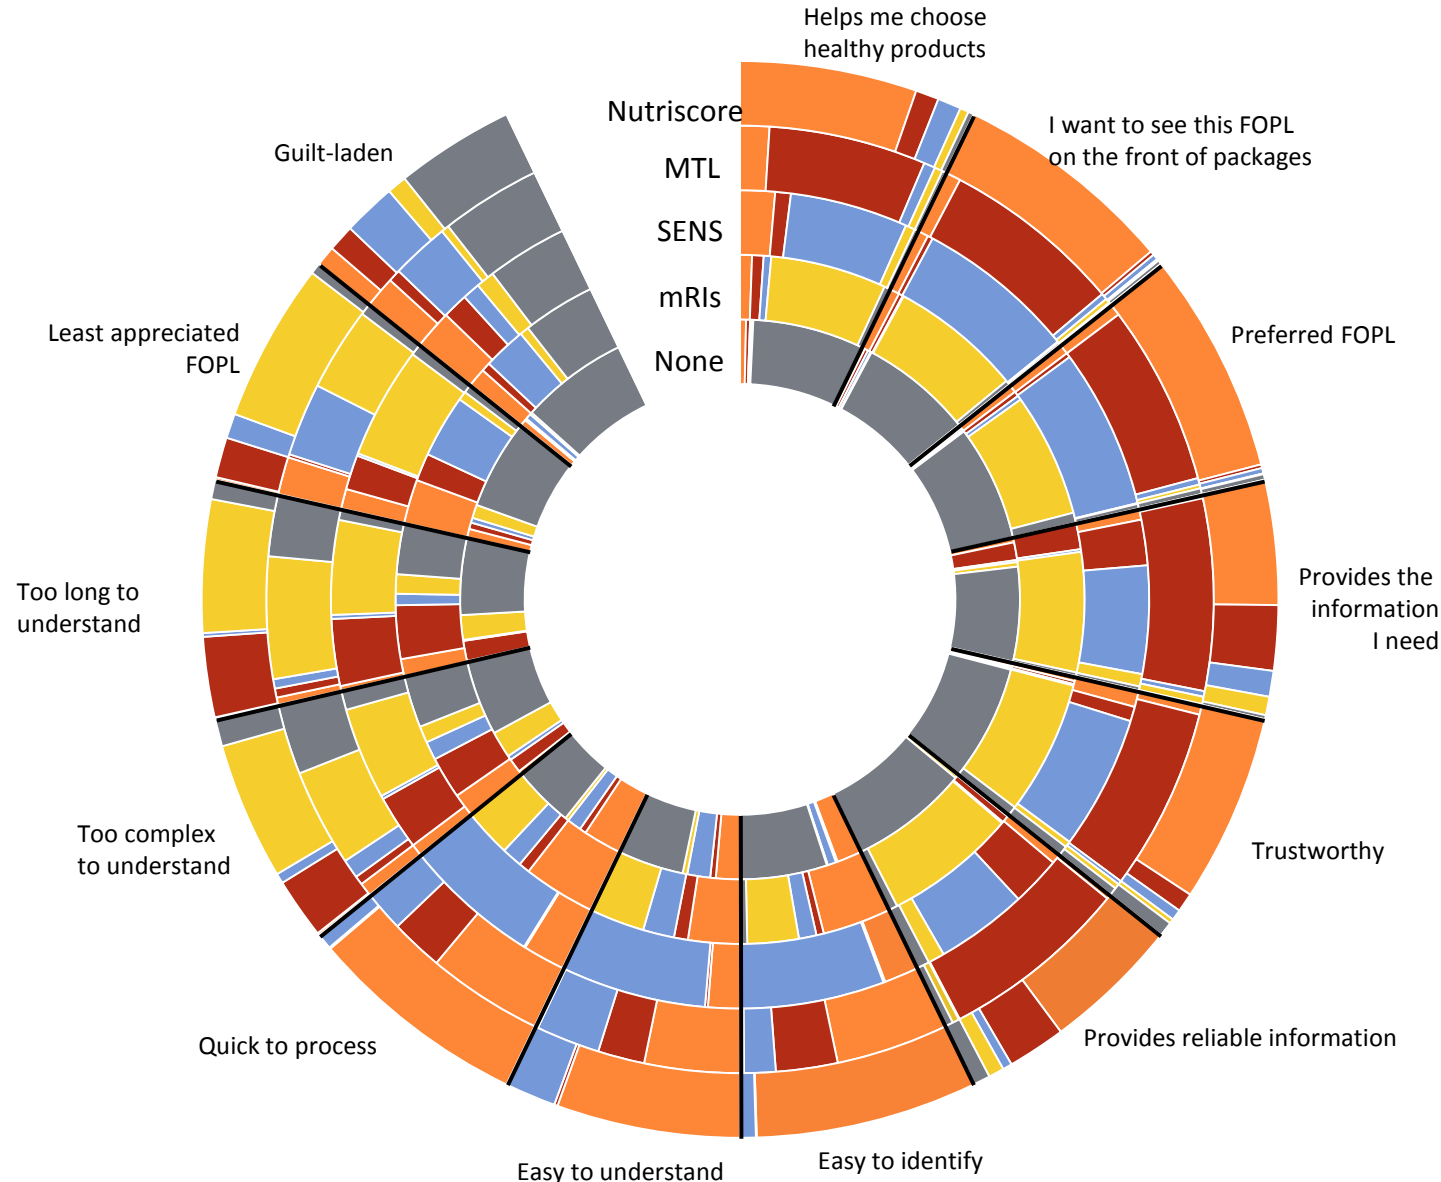

For peer review only - <http://bmjopen.bmj.com/site/about/guidelines.xhtml>

■ Nutriscore    
 ■ MTL    
 ■ SENS    
 ■ mRIs    
 ■ None



1  
2 Online supplementary material  
3

4 **Supplemental Table 1 Questionnaire used to assess perception of the various FOP nutrition labels (French version and English translation)**  
5

6 Question (English Translation)

7 This FOP label is helpful to choose healthier products

8 I want to see this FOP label on the front of packages

9 This is my preferred FOP label

10 This is the FOP label I appreciate the least

11 This FOP label provides me with the information I need

12 This FOP label is trustworthy

13 This FOP label provides reliable information

14 This FOP label is easy to identify

15 This label is easy to understand

16 This FOP label is quick to process

17 This FOP label is too complex for understanding

18 This FOP label takes too long to understand

19 This FOP label is guilt-laden  
20  
21  
22  
23  
24  
25  
26  
27  
28  
29  
30  
31  
32  
33  
34  
35  
36  
37  
38  
39  
40  
41  
42  
43  
44  
45  
46  
47  
48  
49

Question (Original question in French)

Ce logo aide à choisir des produits meilleurs pour la santé

Je veux qu'il soit présent sur les emballages

C'est mon logo préféré

C'est le logo que j'aime le moins

Ce logo m'apporte l'information dont j'ai besoin

Ce logo m'inspire confiance

Ce logo permet d'avoir une information fiable

Ce logo est facile à repérer

Ce logo est facile à comprendre

Ce logo permet d'avoir une information rapide

Ce logo est trop compliqué à comprendre

Ce logo est trop long à comprendre

Ce logo est culpabilisant

1  
2  
3  
4  
5  
6  
7  
8  
9  
10  
11  
12  
13  
14  
15  
16  
17  
18  
19  
20  
21  
22  
23  
24  
25  
26  
27  
28  
29  
30  
31  
32  
33  
34  
35  
36  
37  
38  
39  
40  
41  
42  
43  
44  
45  
46  
47  
48  
49

Online supplementary material

Supplemental Table 2 responses to perception questions according clusters of preference for FOP nutrition labeling

Liking

|                                                        | Nutriscore | MTL   | SENS  | mRIs  | None  |
|--------------------------------------------------------|------------|-------|-------|-------|-------|
| This FOP label is helpful to choose healthier products |            |       |       |       |       |
| Nutriscore                                             | 74.32      | 13.93 | 19.21 | 7.81  | 4.84  |
| SENS                                                   | 9.91       | 5.45  | 65.23 | 4.96  | 1.54  |
| MTL                                                    | 9.78       | 75.12 | 8.65  | 7.54  | 3.2   |
| mRIs                                                   | 3.64       | 3.86  | 5.23  | 76.19 | 1.03  |
| None                                                   | 2.36       | 1.64  | 1.68  | 3.51  | 89.4  |
| I want to see this FOP label on the front of packages  |            |       |       |       |       |
| Nutriscore                                             | 93.45      | 7.64  | 6.32  | 6.89  | 3.1   |
| SENS                                                   | 2.34       | 2.99  | 88.89 | 0.66  | 2.35  |
| MTL                                                    | 1.73       | 86.27 | 2.92  | 2.75  | 2.73  |
| mRIs                                                   | 0.82       | 2.21  | 0.59  | 86.66 | 0.81  |
| None                                                   | 1.66       | 0.89  | 1.28  | 3.04  | 91    |
| This is my preferred FOP label                         |            |       |       |       |       |
| Nutriscore                                             | 93.51      | 6.24  | 6.18  | 5.94  | 3.33  |
| SENS                                                   | 2.3        | 3.12  | 88.31 | 2.9   | 1.05  |
| MTL                                                    | 1.53       | 86.06 | 2.54  | 3.23  | 1.7   |
| mRIs                                                   | 0.33       | 1.84  | 0.42  | 81.23 | 0.47  |
| None                                                   | 2.33       | 2.74  | 2.55  | 6.7   | 93.45 |
| This is the FOP label I appreciate the least           |            |       |       |       |       |
| Nutriscore                                             | 1.08       | 17.92 | 10.9  | 28.78 | 6.79  |
| SENS                                                   | 10.36      | 34.9  | 1.31  | 41.12 | 3.96  |
| MTL                                                    | 16.91      | 1.51  | 19.14 | 18.16 | 5.23  |
| mRIs                                                   | 66.88      | 39.88 | 61.86 | 5.85  | 10.78 |
| None                                                   | 4.77       | 5.78  | 6.78  | 6.09  | 73.24 |

## Online supplementary material

**Awareness and trustworthiness**

|                                                        | Nutriscore | MTL   | SENS  | mRIs  | None  |
|--------------------------------------------------------|------------|-------|-------|-------|-------|
| This FOP label provides me with the information I need |            |       |       |       |       |
| Nutriscore                                             | 52.36      | 2.01  | 6.25  | 0.56  | 4.21  |
| SENS                                                   | 10.83      | 2.66  | 59.59 | 1.74  | 1.71  |
| MTL                                                    | 27.37      | 91.49 | 25.14 | 16.79 | 14.24 |
| mRIs                                                   | 7.78       | 3.58  | 6.87  | 78.6  | 3.66  |
| None                                                   | 1.67       | 0.25  | 2.16  | 2.31  | 76.17 |
| This FOP label is trustworthy                          |            |       |       |       |       |
| Nutriscore                                             | 79.33      | 4.82  | 9.29  | 3.48  | 3.67  |
| SENS                                                   | 4.55       | 1.79  | 74.04 | 0.98  | 1.5   |
| MTL                                                    | 7.98       | 87.15 | 8.04  | 1.98  | 1.21  |
| mRIs                                                   | 1.96       | 2.43  | 3.35  | 87.89 | 0.28  |
| None                                                   | 6.18       | 3.81  | 5.29  | 5.67  | 93.34 |
| This FOP label provides reliable information           |            |       |       |       |       |
| Nutriscore                                             | 57.78      | 2.37  | 5.76  | 1.95  | 0.23  |
| SENS                                                   | 3.92       | 0.48  | 50.74 | 0.88  | 0.12  |
| MTL                                                    | 24.47      | 90.22 | 27.44 | 4.67  | 1.53  |
| mRIs                                                   | 6.54       | 3.18  | 9.22  | 87.05 | 2.36  |
| None                                                   | 7.29       | 3.75  | 6.84  | 5.45  | 95.75 |
| This FOP label is easy to identify                     |            |       |       |       |       |
| Nutriscore                                             | 93.08      | 53.69 | 19.15 | 45.28 | 20.69 |
| SENS                                                   | 6.03       | 15.02 | 79.02 | 11.56 | 6.82  |
| MTL                                                    | 0.34       | 29.44 | 0.99  | 4.83  | 1.41  |
| mRIs                                                   | 0.08       | 0.6   | 0.32  | 33.66 | 0.78  |
| None                                                   | 0.47       | 1.25  | 0.53  | 4.68  | 70.29 |

1  
2  
3  
4  
5  
6  
7  
8  
9  
10  
11  
12  
13  
14  
15  
16  
17  
18  
19  
20  
21  
22  
23  
24  
25  
26  
27  
28  
29  
30  
31  
32  
33  
34  
35  
36  
37  
38  
39  
40  
41  
42  
43  
44  
45  
46  
47  
48  
49

Online supplementary material

**Perceived cognitive workload**

|                                                 | Nutriscore | MTL   | SENS  | mRIs  | None  |
|-------------------------------------------------|------------|-------|-------|-------|-------|
| This label is easy to understand                |            |       |       |       |       |
| Nutriscore                                      | 77.11      | 45.5  | 17.55 | 33.92 | 19.4  |
| SENS                                            | 20.75      | 30.45 | 80.77 | 20.47 | 18.54 |
| MTL                                             | 1.41       | 22.27 | 1.58  | 9.16  | 4.46  |
| mRIs                                            | 0.51       | 1.46  | 0.09  | 35.6  | 3.72  |
| None                                            | 0.22       | 0.33  | 0     | 0.85  | 53.88 |
| This FOP label is quick to process              |            |       |       |       |       |
| Nutriscore                                      | 92.72      | 55.07 | 23.2  | 47.31 | 30.42 |
| SENS                                            | 6.18       | 18.75 | 75.65 | 13.43 | 11.67 |
| MTL                                             | 0.62       | 25.17 | 0.75  | 7.31  | 5.22  |
| mRIs                                            | 0.38       | 0.88  | 0.39  | 31.18 | 2.88  |
| None                                            | 0.1        | 0.12  | 0.01  | 0.78  | 49.82 |
| This FOP label is too complex for understanding |            |       |       |       |       |
| Nutriscore                                      | 0.99       | 6.38  | 6.36  | 14.98 | 2.75  |
| SENS                                            | 4.23       | 9.09  | 1.86  | 12.2  | 3.51  |
| MTL                                             | 25.49      | 4.24  | 30.07 | 27.56 | 11.35 |
| mRIs                                            | 57.73      | 46.53 | 50.78 | 10.9  | 21.55 |
| None                                            | 11.56      | 33.77 | 10.92 | 34.35 | 60.84 |
| This FOP label takes too long to understand     |            |       |       |       |       |
| Nutriscore                                      | 0.77       | 3.45  | 2.37  | 11.12 | 0.65  |
| SENS                                            | 1.57       | 4.47  | 2.19  | 7.43  | 0.81  |
| MTL                                             | 33.71      | 4.33  | 36.95 | 35.12 | 16.19 |
| mRIs                                            | 55.76      | 58.12 | 52.13 | 12.73 | 19.83 |
| None                                            | 8.19       | 29.63 | 6.36  | 33.6  | 62.51 |
| This FOP label is guilt-laden                   |            |       |       |       |       |
| Nutriscore                                      | 8.33       | 14.8  | 21.33 | 12.13 | 4.97  |
| SENS                                            | 22.37      | 27.72 | 9.68  | 28.3  | 4.59  |
| MTL                                             | 11.15      | 5.87  | 14.04 | 5.84  | 1.59  |
| mRIs                                            | 8.23       | 3.73  | 10.16 | 5.93  | 1.73  |
| None                                            | 49.93      | 47.89 | 44.78 | 47.8  | 87.12 |

1  
2 Online supplementary material  
3  
4  
5  
6  
7  
8  
9  
10  
11  
12  
13  
14  
15  
16  
17  
18  
19  
20  
21  
22  
23  
24  
25  
26  
27  
28  
29  
30  
31  
32  
33  
34  
35  
36  
37  
38  
39  
40  
41  
42  
43  
44  
45  
46  
47  
48  
49

For peer review only

STROBE Statement—Checklist of items that should be included in reports of *cross-sectional studies*

|                              | Item No | Recommendation                                                                                                                                                                                                                                                                                                                                                                                                                                |
|------------------------------|---------|-----------------------------------------------------------------------------------------------------------------------------------------------------------------------------------------------------------------------------------------------------------------------------------------------------------------------------------------------------------------------------------------------------------------------------------------------|
| <b>Title and abstract</b>    | 1       | (a) Indicate the study's design with a commonly used term in the title or the abstract <b>Page 4</b><br>(b) Provide in the abstract an informative and balanced summary of what was done and what was found <b>Page 4</b>                                                                                                                                                                                                                     |
| <b>Introduction</b>          |         |                                                                                                                                                                                                                                                                                                                                                                                                                                               |
| Background/rationale         | 2       | Explain the scientific background and rationale for the investigation being reported <b>Page 6</b>                                                                                                                                                                                                                                                                                                                                            |
| Objectives                   | 3       | State specific objectives, including any prespecified hypotheses <b>Page 7</b>                                                                                                                                                                                                                                                                                                                                                                |
| <b>Methods</b>               |         |                                                                                                                                                                                                                                                                                                                                                                                                                                               |
| Study design                 | 4       | Present key elements of study design early in the paper <b>Page 8</b>                                                                                                                                                                                                                                                                                                                                                                         |
| Setting                      | 5       | Describe the setting, locations, and relevant dates, including periods of recruitment, exposure, follow-up, and data collection <b>Page 8</b>                                                                                                                                                                                                                                                                                                 |
| Participants                 | 6       | (a) Give the eligibility criteria, and the sources and methods of selection of participants <b>Page 8-10</b>                                                                                                                                                                                                                                                                                                                                  |
| Variables                    | 7       | Clearly define all outcomes, exposures, predictors, potential confounders, and effect modifiers. Give diagnostic criteria, if applicable <b>Page 8-10</b>                                                                                                                                                                                                                                                                                     |
| Data sources/<br>measurement | 8*      | For each variable of interest, give sources of data and details of methods of assessment (measurement). Describe comparability of assessment methods if there is more than one group <b>Page 8-10</b>                                                                                                                                                                                                                                         |
| Bias                         | 9       | Describe any efforts to address potential sources of bias <b>Page 10</b>                                                                                                                                                                                                                                                                                                                                                                      |
| Study size                   | 10      | Explain how the study size was arrived at <b>Page 11</b>                                                                                                                                                                                                                                                                                                                                                                                      |
| Quantitative variables       | 11      | Explain how quantitative variables were handled in the analyses. If applicable, describe which groupings were chosen and why <b>Page 8-10</b>                                                                                                                                                                                                                                                                                                 |
| Statistical methods          | 12      | (a) Describe all statistical methods, including those used to control for confounding <b>Page 10-11</b><br>(b) Describe any methods used to examine subgroups and interactions <b>Not applicable</b><br>(c) Explain how missing data were addressed <b>Page 10</b><br>(d) If applicable, describe analytical methods taking account of sampling strategy <b>Not Applicable</b><br>(e) Describe any sensitivity analyses <b>Not Applicable</b> |
| <b>Results</b>               |         |                                                                                                                                                                                                                                                                                                                                                                                                                                               |
| Participants                 | 13*     | (a) Report numbers of individuals at each stage of study—eg numbers potentially eligible, examined for eligibility, confirmed eligible, included in the study, completing follow-up, and analysed <b>Page 11</b><br>(b) Give reasons for non-participation at each stage <b>Page 11</b><br>(c) Consider use of a flow diagram                                                                                                                 |
| Descriptive data             | 14*     | (a) Give characteristics of study participants (eg demographic, clinical, social) and information on exposures and potential confounders <b>Page 12, Table 1</b><br>(b) Indicate number of participants with missing data for each variable of interest <b>Page 11</b>                                                                                                                                                                        |
| Outcome data                 | 15*     | Report numbers of outcome events or summary measures <b>Page 12, Table 2</b>                                                                                                                                                                                                                                                                                                                                                                  |
| Main results                 | 16      | (a) Give unadjusted estimates and, if applicable, confounder-adjusted estimates and their precision (eg, 95% confidence interval). Make clear which confounders were                                                                                                                                                                                                                                                                          |

|                          |    |                                                                                                                                                                                              |
|--------------------------|----|----------------------------------------------------------------------------------------------------------------------------------------------------------------------------------------------|
|                          |    | adjusted for and why they were included <b>Page 12-13, Tables</b>                                                                                                                            |
|                          |    | (b) Report category boundaries when continuous variables were categorized <b>Page 8-10, Tables</b>                                                                                           |
|                          |    | (c) If relevant, consider translating estimates of relative risk into absolute risk for a meaningful time period <b>Not Applicable</b>                                                       |
| Other analyses           | 17 | Report other analyses done—eg analyses of subgroups and interactions, and sensitivity analyses                                                                                               |
| <b>Discussion</b>        |    |                                                                                                                                                                                              |
| Key results              | 18 | Summarise key results with reference to study objectives <b>Page 13</b>                                                                                                                      |
| Limitations              | 19 | Discuss limitations of the study, taking into account sources of potential bias or imprecision. Discuss both direction and magnitude of any potential bias <b>Page 16</b>                    |
| Interpretation           | 20 | Give a cautious overall interpretation of results considering objectives, limitations, multiplicity of analyses, results from similar studies, and other relevant evidence <b>Page 13-16</b> |
| Generalisability         | 21 | Discuss the generalisability (external validity) of the study results <b>Page 16</b>                                                                                                         |
| <b>Other information</b> |    |                                                                                                                                                                                              |
| Funding                  | 22 | Give the source of funding and the role of the funders for the present study and, if applicable, for the original study on which the present article is based <b>Page 3</b>                  |

\*Give information separately for exposed and unexposed groups.

**Note:** An Explanation and Elaboration article discusses each checklist item and gives methodological background and published examples of transparent reporting. The STROBE checklist is best used in conjunction with this article (freely available on the Web sites of PLoS Medicine at <http://www.plosmedicine.org/>, Annals of Internal Medicine at <http://www.annals.org/>, and Epidemiology at <http://www.epidem.com/>). Information on the STROBE Initiative is available at [www.strobe-statement.org](http://www.strobe-statement.org).

# BMJ Open

## Perception of different formats of front-of-pack nutrition labels according to sociodemographic, lifestyle and dietary factors in a French population

|                                 |                                                                                                                                                                                                                                                                                                                                                                                                                                                                                                                                                                                                                                                                                                                                                                                                                                                                                                                                                                                                                                                                                                                                                                                                                                                                                                                                                                                                                                                                                                                                                                                                                                                                                                                                                                                                                                                                                 |
|---------------------------------|---------------------------------------------------------------------------------------------------------------------------------------------------------------------------------------------------------------------------------------------------------------------------------------------------------------------------------------------------------------------------------------------------------------------------------------------------------------------------------------------------------------------------------------------------------------------------------------------------------------------------------------------------------------------------------------------------------------------------------------------------------------------------------------------------------------------------------------------------------------------------------------------------------------------------------------------------------------------------------------------------------------------------------------------------------------------------------------------------------------------------------------------------------------------------------------------------------------------------------------------------------------------------------------------------------------------------------------------------------------------------------------------------------------------------------------------------------------------------------------------------------------------------------------------------------------------------------------------------------------------------------------------------------------------------------------------------------------------------------------------------------------------------------------------------------------------------------------------------------------------------------|
| Journal:                        | <i>BMJ Open</i>                                                                                                                                                                                                                                                                                                                                                                                                                                                                                                                                                                                                                                                                                                                                                                                                                                                                                                                                                                                                                                                                                                                                                                                                                                                                                                                                                                                                                                                                                                                                                                                                                                                                                                                                                                                                                                                                 |
| Manuscript ID                   | bmjopen-2017-016108.R1                                                                                                                                                                                                                                                                                                                                                                                                                                                                                                                                                                                                                                                                                                                                                                                                                                                                                                                                                                                                                                                                                                                                                                                                                                                                                                                                                                                                                                                                                                                                                                                                                                                                                                                                                                                                                                                          |
| Article Type:                   | Research                                                                                                                                                                                                                                                                                                                                                                                                                                                                                                                                                                                                                                                                                                                                                                                                                                                                                                                                                                                                                                                                                                                                                                                                                                                                                                                                                                                                                                                                                                                                                                                                                                                                                                                                                                                                                                                                        |
| Date Submitted by the Author:   | 29-Mar-2017                                                                                                                                                                                                                                                                                                                                                                                                                                                                                                                                                                                                                                                                                                                                                                                                                                                                                                                                                                                                                                                                                                                                                                                                                                                                                                                                                                                                                                                                                                                                                                                                                                                                                                                                                                                                                                                                     |
| Complete List of Authors:       | <p>Julia, Chantal; Université Paris 13, Equipe de Recherche en Epidémiologie Nutritionnelle, Centre de Recherche en Epidémiologie et Statistiques, Inserm (U1153), Inra (U1125), Cnam, COMUE Sorbonne Paris Cité; Hôpital Avicenne (AP-HP), Public Health Department</p> <p>Péneau, Sandrine; Université Paris 13, Equipe de Recherche en Epidémiologie Nutritionnelle, Centre de Recherche en Epidémiologie et Statistiques, Inserm (U1153), Inra (U1125), Cnam, COMUE Sorbonne Paris Cité,</p> <p>Buscaïl, Camille; Université Paris 13, Equipe de Recherche en Epidémiologie Nutritionnelle, Centre de Recherche en Epidémiologie et Statistiques, Inserm (U1153), Inra (U1125), Cnam, COMUE Sorbonne Paris Cité; Université Paris 13, Equipe de Recherche en Epidémiologie Nutritionnelle, Centre de Recherche en Epidémiologie et Statistiques, Inserm (U1153), Inra (U1125), Cnam, COMUE Sorbonne Paris Cité</p> <p>Gonzalez, Rebecca; Université Paris 13, Equipe de Recherche en Epidémiologie Nutritionnelle, Centre de Recherche en Epidémiologie et Statistiques, Inserm (U1153), Inra (U1125), Cnam, COMUE Sorbonne Paris Cité</p> <p>Touvier, Mathilde; Université Paris 13, Equipe de Recherche en Epidémiologie Nutritionnelle, Centre de Recherche en Epidémiologie et Statistiques, Inserm (U1153), Inra (U1125), Cnam, COMUE Sorbonne Paris Cité,</p> <p>Hercberg, Serge; Université Paris 13, Equipe de Recherche en Epidémiologie Nutritionnelle, Centre de Recherche en Epidémiologie et Statistiques, Inserm (U1153), Inra (U1125), Cnam, COMUE Sorbonne Paris Cité; Hôpital Avicenne (AP-HP), Public Health Department</p> <p>Kesse-Guyot, Emmanuelle; Université Paris 13, Equipe de Recherche en Epidémiologie Nutritionnelle, Centre de Recherche en Epidémiologie et Statistiques, Inserm (U1153), Inra (U1125), Cnam, COMUE Sorbonne Paris Cité</p> |
| <b>Primary Subject Heading</b>: | Health policy                                                                                                                                                                                                                                                                                                                                                                                                                                                                                                                                                                                                                                                                                                                                                                                                                                                                                                                                                                                                                                                                                                                                                                                                                                                                                                                                                                                                                                                                                                                                                                                                                                                                                                                                                                                                                                                                   |
| Secondary Subject Heading:      | Nutrition and metabolism, Epidemiology, Public health                                                                                                                                                                                                                                                                                                                                                                                                                                                                                                                                                                                                                                                                                                                                                                                                                                                                                                                                                                                                                                                                                                                                                                                                                                                                                                                                                                                                                                                                                                                                                                                                                                                                                                                                                                                                                           |
| Keywords:                       | public health policy, Front-of-pack nutrition labels, Perception                                                                                                                                                                                                                                                                                                                                                                                                                                                                                                                                                                                                                                                                                                                                                                                                                                                                                                                                                                                                                                                                                                                                                                                                                                                                                                                                                                                                                                                                                                                                                                                                                                                                                                                                                                                                                |
|                                 |                                                                                                                                                                                                                                                                                                                                                                                                                                                                                                                                                                                                                                                                                                                                                                                                                                                                                                                                                                                                                                                                                                                                                                                                                                                                                                                                                                                                                                                                                                                                                                                                                                                                                                                                                                                                                                                                                 |



1  
2  
3  
4  
5  
6  
7  
8  
9  
10  
11  
12  
13  
14  
15  
16  
17  
18  
19  
20  
21  
22  
23  
24  
25  
26  
27  
28  
29  
30  
31  
32  
33  
34  
35  
36  
37  
38  
39  
40  
41  
42  
43  
44  
45  
46  
47  
48  
49  
50  
51  
52  
53  
54  
55  
56  
57  
58  
59  
60

SCHOLARONE™  
Manuscripts

For peer review only

1  
2  
3  
4  
5 **Perception of different formats of front-of-pack nutrition labels according**  
6  
7 **to sociodemographic, lifestyle and dietary factors in a French population**  
8

9 Chantal Julia, senior lecturer<sup>1,2</sup>, Sandrine Péneau, senior lecturer<sup>1</sup>, Camille Buscail, resident<sup>1</sup>, Rebecca  
10 Gonzales, Post-doc, Mathilde Touvier, research fellow<sup>1</sup>, Serge Hercberg, professor<sup>1,2</sup>, Emmanuelle  
11 Kesse-Guyot, director of research<sup>1</sup>  
12  
13  
14  
15

16 <sup>1</sup> Université Paris 13, Equipe de Recherche en Epidémiologie Nutritionnelle (EREN), Centre  
17 d'Epidémiologie et Biostatistiques Sorbonne Paris Cité (CRESS), Inserm U1153, Inra U1125, Cnam,  
18 COMUE Sorbonne-Paris-Cité, F-93017 Bobigny, France  
19  
20

21 <sup>2</sup> Département de Santé Publique, Hôpital Avicenne (AP-HP), F-93017 Bobigny, France  
22  
23

24 **Corresponding author/reprints requests:**  
25

26 Chantal Julia c.julia@uren.smbh.univ-paris13.fr  
27

28 Université Paris 13, Equipe de Recherche en Epidémiologie Nutritionnelle (EREN), Centre de  
29 Recherche en Epidémiologie et Biostatistiques, Inserm (U1153), Inra(U1125), Cnam, COMUE  
30 Sorbonne Paris Cité, F-93017 Bobigny, France.  
31  
32

33 74 rue Marcel Cachin F-93017 Bobigny Cedex. France.  
34  
35

36 +33 1 48 38 89 53  
37

38 +33 1 48 38 89 31  
39

40 **Last name of authors:** Julia, Péneau, Buscail, Gonzalez, Touvier, Hercberg, Kesse-Guyot  
41

42 **Abstract word count:** 286  
43

44 **Word count (Introduction to Conclusion):** 4312  
45

46 **Number of figures:**2  
47

48 **Number of tables:** 3  
49

50 **Number of coloured figures:** 2  
51

52 **Supplemental material:** 2 tables  
53  
54

55 **Running title:** FOP label perception  
56  
57  
58  
59  
60

**Keywords:** Front-of-pack nutrition labels; perception;

**Abbreviations:**

5-CNL: Five-colour nutrition label

FOP: Front-of-pack

FSA: Food Standards Agency

FSA-NPS DI : Food Standards Agency Nutrient Profiling System Dietary Index

NPS : Nutrient Profiling System

OfCom: Office of Communication

PNNS: Programme National Nutrition Santé

UK: United Kingdom

**COPYRIGHT DECLARATION**

The Corresponding Author has the right to grant on behalf of all authors and does grant on behalf of all authors, a worldwide licence to the Publishers and its licensees in perpetuity, in all forms, formats and media (whether known now or created in the future), to i) publish, reproduce, distribute, display and store the Contribution, ii) translate the Contribution into other languages, create adaptations, reprints, include within collections and create summaries, extracts and/or, abstracts of the Contribution, iii) create any other derivative work(s) based on the Contribution, iv) to exploit all subsidiary rights in the Contribution, v) the inclusion of electronic links from the Contribution to third party material where-ever it may be located; and, vi) licence any third party to do any or all of the above.

**CONFLICT OF INTEREST STATEMENT**

All authors have completed the Unified Competing Interest form at [www.icmje.org/coi\\_disclosure.pdf](http://www.icmje.org/coi_disclosure.pdf) (available on request from the corresponding author) and declare that (1) No authors have support from any company for the submitted work; (2) All authors have no relationships with any company that might have an interest in the submitted work in the previous 3 years; (3) their spouses, partners, or children have no financial relationships that may be relevant to the submitted work; and (4) All authors have no non-financial interests that may be relevant to the submitted work.

**AUTHORSHIP CONTRIBUTION**

CJ wrote the statistical analysis plan, analysed the data, and drafted and revised the paper. She is the guarantor. EKG participated in statistical analysis plan, analysed the data and critically revised the

1  
2  
3 paper for important intellectual content. MT CB SP RG analysed the data and critically revised the  
4 paper for important intellectual content. SH designed data collection tools, implemented the study,  
5 monitored data collection for the whole study, and critically revised the draft paper for important  
6 intellectual content. All authors, external and internal, had full access to all of the data (including  
7 statistical reports and tables) in the study and can take responsibility for the integrity of the data and  
8 the accuracy of the data analysis. All authors have read and approved the final manuscript.  
9

## 10 11 12 **ETHICS**

13  
14 The NutriNet-Santé study is conducted in accordance with the Declaration of Helsinki, and all  
15 procedures have been approved by the Institutional Review Board of the French Institute for Health  
16 and Medical Research (0000388FWA00005831) and the *Commission Nationale de l'Informatique et*  
17 *des Libertés* (908450 and 909216). Electronic informed consent was obtained from all participants.  
18 The Nutrinet-santé study is registered under EudraCT registration number 2013-000929-31.  
19  
20  
21

## 22 23 **SOURCES OF SUPPORT**

24  
25 The NutriNet-Santé Study is supported by the French Ministry of Health, the Institut de Veille  
26 Sanitaire, the Institut National de la Santé et de la Recherche Médicale, the Institut National de la  
27 Recherche Agronomique, the Conservatoire National des Arts et Métiers, the Institut National de  
28 Prévention et d'Education pour la Santé and the Fondation pour la Recherche Médicale and Paris 13  
29 University. The funders had no role in study design, data collection and analysis, decision to publish,  
30 or preparation of the manuscript.  
31

32 Study sponsors had no part in study design, collection, analysis, and interpretation of data and the  
33 writing of the article and the decision to submit it for publication. Researchers are independent from  
34 funders and sponsors. All researchers had access to all the data  
35  
36  
37  
38

## 39 40 **TRANSPARENCY DECLARATION**

41 Chantal Julia affirms that the manuscript is an honest, accurate, and transparent account of the study  
42 being reported; that no important aspects of the study have been omitted; and that any discrepancies  
43 from the study as planned (and, if relevant, registered) have been explained.  
44  
45  
46  
47

## 48 49 **DATA SHARING**

50 All necessary information is available in the paper.  
51  
52  
53  
54  
55  
56  
57  
58  
59  
60

## ABSTRACT

**Objective:** Four formats for a front-of-pack (FOP) nutrition label are currently considered in France: the Nutriscore (or 5-Colour Nutrition Label, developed by a public research team), the SENS (supported by retailers), multiple traffic lights (MTL, currently used in UK) and a modified version of the Reference Intakes (mRIs, supported by industry). Our objective was to investigate the perception of these FOP labels, according to sociodemographic, lifestyle and dietary factors.

**Design:** Cross-sectional study

**Setting:** Web-based French cohort

**Main outcome measure:** FOP labels perception

**Participants:** Participants in the NutriNet-Santé cohort received a specific questionnaire on the perceptions of the four label formats identified. Socio-demographic, lifestyle and dietary data (three 24h dietary records) were collected through self-administered questionnaires. Mutually exclusive clusters of FOP labels perception were identified through a multiple correspondence analysis followed by a hierarchical clustering procedure. Socio-demographic, lifestyle and dietary factors associated with the clusters were explored using multivariable multinomial logistic regression. All analyses were weighted according to 2009 French census data.

**Results:** Among the 21,702 participants in the study, the Nutriscore received the most important number of favourable responses on positive perception dimensions by participants, followed by MTL and SENS. The 5 identified clusters were characterized by marked preferences for Nutriscore (Cluster 1, 43.2% of participants, crude N=9,399), MTL (Cluster 2, 27.3%, crude N=6,163), SENS (Cluster 3, 17.05%, crude N=3,546), mRIs (Cluster 4, 7.31%, crude N=1,632) and none of the presented formats (Cluster 5, 5.10%, crude N=965). The Cluster 1 (Nutriscore) was associated with lower adherence to nutritional recommendations, while Cluster 2 (MTL) was associated with younger age and higher level of education.

1  
2  
3 **Conclusion:** The Nutriscore appears to have a wide reach in the population and to appeal to subjects  
4  
5 with lower adherence to nutritional recommendations.  
6

## 7 **ARTICLE SUMMARY**

- 10 • Cross-sectional study in a large population using validated data collection tools.
- 11 • Investigation of multiple dimensions of the perception of FOP labels (awareness, liking,  
12 perceived cognitive workload and trustworthiness), across various formats that are currently  
13 proposed in the French debate on FOP nutrition labelling.  
14  
15
- 16 • Identification of clustered preferences towards each type of format, and investigation of the  
17 association between socio-demographic and dietary factors with FOP label preferences  
18  
19
- 20 • Sample consisting of volunteer subjects included in a cohort study on nutrition, who are therefore  
21 more likely health conscious.  
22  
23
- 24 • Focus on the perception of FOP labels, and not on understanding or use of FOP labels in  
25 purchasing situations.  
26  
27  
28  
29  
30  
31  
32  
33  
34  
35  
36  
37  
38  
39  
40  
41  
42  
43  
44  
45  
46  
47  
48  
49  
50  
51  
52  
53  
54  
55  
56  
57  
58  
59  
60

## INTRODUCTION

Preventing non-communicable diseases has become a top priority for most industrialized countries, as they represent a major part of the burden of diseases (1). In France, cardiovascular diseases and cancers are the first causes of death, contributing each to approximately 30% of overall deaths every year (2). Diet has been recognized as a key modifiable factor which can influence – as preventive or risk factor – a wide range of non-communicable diseases, from cardiovascular disease to cancer, type 2 diabetes, metabolic syndrome or obesity (3-5). Given its potential lever for improvement of the health status of the population, most western countries have invested in state-level public health programs on nutrition, promoting healthy diets and physical activity (6-8). In France, the National Nutrition and Health Program (Programme National Nutrition et Santé, PNNS), launched in 2001 (9), sets a regulatory environment that promotes synergistic actions towards healthy eating and physical activity. The most pervasive actions that have been taken towards the population have consisted in the dissemination of nutrition recommendations in multimedia campaigns and booklets (10;11). Those recommendations act upon the nutrition knowledge of individuals, prompting them to modify their dietary behaviour by promoting consumption of some food groups (e.g. fruits and vegetables, whole-grain cereals, water) or limiting excessive intakes of others (saturated fat, added sugar and sodium) (12). Recently, novel complementary strategies have been put forward in a report to the French Minister of Health in 2014, highlighting the need for specific measures to modify the nutritional environment beyond the actions at the individual level (13). The report stressed in particular measures pertaining to nutrition labelling, in the form of a simplified front-of-pack (FOP) nutrition label, advertising regulation and nutritional taxation (13). Among the proposals of this report, the implementation of a FOP nutrition labelling system was considered as an effective opportunity by the Health Minister, and its principle was introduced in the 2016 French Health Law (14). Many countries have implemented FOP nutrition labels worldwide, either nutrient-specific, such as the ‘Multiple Traffic Light’ system in the UK (15) or summary measures, either simple – such as the Dutch ‘Choices’ logo (16) or the Nordic ‘Green Keyhole’ (17) – or graded – such as the ‘Health Star Rating System’ in New Zealand and Australia (18). Summary systems have been considered as more easily

1  
2 understood and interpreted than nutrient-specific labels, in particular for vulnerable populations  
3  
4 (19;20). Moreover, colour-coded systems are considered more favourably perceived than monochrome  
5  
6 systems (20;21). The initial report to the French Health Minister contained a detailed proposal for a  
7  
8 simple colour-coded and graded label, supported by scientific studies (22-34) and independent  
9  
10 government agencies evaluations (35;36) in the form of the 5-Colour Nutrition Label (5-CNL).  
11  
12 However, alternative proposals were put forward during the debate by industry and retailers, in a vast  
13  
14 lobbying campaign (37). Finally, four alternative formats emerged in the debate: the Nutriscore (an  
15  
16 updated graphical version of the 5-CNL), SENS (a summary, graded and colour-coded label,  
17  
18 developed and promoted by retailers), Multiple Traffic Lights (MTL, nutrient-specific and colour-  
19  
20 coded label, currently used in the United Kingdom, UK) and a modified version of the Reference  
21  
22 Intakes (mRIs, a nutrient-specific and monochrome label promoted by industry) (**Figure 1**). However,  
23  
24 to date, no scientific study has directly compared the perception of the four proposed formats. Some  
25  
26 studies tend to indicate that the 5-CNL would be more favourably perceived than MTL or RIs (25) and  
27  
28 that it may help consumers identifying (24;25) and purchasing healthier foods (26;34) but no data has  
29  
30 been published on the mRIs or the SENS formats.  
31  
32

33 The objective of the present study was therefore to investigate the perception of the four formats that  
34  
35 have been put forward in France in the debate on FOP nutrition labelling, in a comparative design  
36  
37 carried out in the NutriNet-Santé cohort.  
38  
39

## 40 **MATERIAL AND METHODS**

### 41 **Population**

42  
43 Participants were selected from the NutriNet-Santé cohort. Briefly, the NutriNet-santé study is a  
44  
45 prospective cohort study set in France in which inclusion and follow-up of volunteer participants are  
46  
47 entirely performed on the Internet (38). The main objectives of the NutriNet-santé study are: 1) to  
48  
49 investigate the relationship between nutrition and health outcomes; and 2) to investigate the  
50  
51 determinants of dietary patterns and nutritional status. Inclusion in the study began in May, 2009, and  
52  
53 is still ongoing. Volunteer participants aged >18 years-old subscribe to the study, and are included  
54  
55  
56  
57  
58  
59  
60



1  
2  
3 when they have completed a set of questionnaires assessing: diet (through repeated 24h dietary  
4 records), physical activity, anthropometry, lifestyle and socio-economic conditions and health status.  
5 These five types of questionnaires are repeated yearly and have been validated against traditional  
6 assessment methods (paper or interview by dietitians) (39-41). Once the subjects are included in the  
7 cohort, they receive monthly web-questionnaires pertaining to various aspects of dietary behaviour,  
8 physical activity and health, which are optional, and graded according to their relative importance for  
9 research. Participants do not receive any form of incentive or compensation to participate in the online  
10 surveys. One of these questionnaires pertained to the perception of the various FOP labelling systems  
11 that have been proposed in the French context and was sent to all participants in the cohort in June  
12 2016.  
13  
14  
15  
16  
17  
18  
19  
20  
21  
22

23 Detailed information on the NutriNet-Santé study can be found elsewhere (38).  
24  
25

## 26 **Ethics**

27  
28 The NutriNet-Santé study is conducted in accordance with the Declaration of Helsinki, and all  
29 procedures have been approved by the Institutional Review Board of the French Institute for Health  
30 and Medical Research (0000388FWA00005831) and the *Commission Nationale de l'Informatique et*  
31 *des Libertés* (908450 and 909216). Electronic informed consent was obtained from all participants.  
32  
33

34 The NutriNet-Santé study is registered under EudraCT registration number 2013-000929-31.  
35  
36  
37

## 38 **Perception of FOP labels**

39  
40 A specific questionnaire was develop using survey items from previously published research to  
41 investigate participants' perceptions of the four FOP labelling formats that are currently being debated  
42 in France (25;42). The questionnaire also included other dimensions of FOP nutrition labelling  
43 evaluation (objective understanding and legitimacy), which were not used in this study. A brief  
44 presentation of the four FOP labels was provided for the participants at the beginning of the  
45 questionnaire on the perceptions of FOP labels. The presentation made no mention of the origin or  
46 support by researchers or industry of each format, in order not to influence the participants based on  
47 this information.  
48  
49  
50  
51  
52  
53  
54  
55  
56  
57  
58  
59  
60

1  
2  
3 Briefly, the Nutriscore, developed by the Nutritional Epidemiology Research Team (Equipe de  
4 Recherche en Epidémiologie Nutritionnelle, authors of this paper, EREN) scientific research team, and  
5 based on the British Food Standards Agency nutrient profiling system and adapted for the French  
6 context by the High Council for Public Health (36) presents for each food or beverage the overall  
7 nutritional quality on a 5-point colour-coded scale from Green to Red (**Figure 1**). SENS, supported by  
8 retailers, is based on a nutrient profiling system developed by a research team, and presents for each  
9 food or beverage a recommended frequency of consumption, with a 4 points colour-coded scale  
10 (Green, Blue, Orange and Purple) (**Figure 1**). MTL, implemented in Great Britain since 2005 presents  
11 the numeric values of the contribution of a portion of the food to the intakes in a balanced diet (in  
12 grams and percentage of reference intakes, corresponding to the reference intakes label) for energy,  
13 fats, saturated fats, sugar and sodium, with a colour-coding (Green, Amber and Red) for each of these  
14 components of the food (**Figure 1**). The Modified Reference Intakes (mRIs) present the numeric  
15 values of the reference intakes, in both grams and percentage of reference intakes, with bars varying in  
16 height depending on the amount of the component in the food (**Figure 1**).

17  
18  
19  
20  
21  
22  
23  
24  
25  
26  
27  
28  
29  
30  
31 Overall, 13 questions were asked on various aspects of liking (e.g. “This is my preferred FOP label”),  
32 trustworthiness (e.g. “This FOP label provides reliable information”), awareness (e.g. “This FOP label  
33 is easy to identify”) and perceived cognitive workload (e.g. “This label is too complex for  
34 understanding”) (see **Supplemental table 1**). For each question, subjects were asked to select among  
35 the four formats the label that best corresponded to them. The participants could also select that ‘none’  
36 of the proposed labels corresponded to his/her perception.  
37  
38  
39  
40  
41  
42  
43

#### 44 **Socio-demographic and lifestyle data**

45  
46 Socio-demographic and lifestyle data were collected through self-administered questionnaires and  
47 included age, sex, education (no diploma and up to secondary education, University  $\leq 2$  years,  
48 University  $> 2$  years ), marital status (in couple, single/divorced/widowed), income per household unit  
49 (43) ( $<1200$ /month, 1200 – 1800, 1800 – 2700,  $\geq 2700$  €/month) and smoking status (current smoker,  
50 former smoker and never smoker). Physical activity was computed using self-declared data from the  
51 validated International Physical Activity Questionnaire (low, moderate and high physical activity  
52  
53  
54  
55  
56  
57  
58  
59  
60

1  
2  
3 levels) (44). The data collected in the questionnaire closest in time to the questionnaire on the  
4 perceptions of FOP labels were taken into account for the analyses.  
5

### 6 7 **Dietary data**

8  
9 Dietary data were derived from three repeated 24-hour records randomly distributed in a two-week  
10 period, with two week days and one week-end day. Food consumption was weighted according to the  
11 day of the week of each record. The participants are asked to estimate the portion size for each  
12 reported food and beverage item using validated photographs (45). Nutrient intake was computed  
13 using a published food composition database reflecting foods usually consumed in the French diet  
14 (46). Under-reporters for energy intake were identified using Goldberg/Black's method and were  
15 excluded (47). The dietary data from the 24h dietary record in the NutriNet-Sante study have been  
16 validated against interviewer-led dietary recalls conducted by trained dietitians, and against  
17 biomarkers of nutritional status (40;48;49).  
18  
19  
20  
21  
22  
23  
24  
25  
26  
27

### 28 **Statistical analysis**

29  
30 For the present study, all participants who had completed the questionnaire on the perception of FOP  
31 labels, and having completed information on all covariates were eligible to the present study. Subjects  
32 were excluded if they stated that they never engaged in grocery shopping. The records and  
33 questionnaires closest to the questionnaire on the perceptions of FOP labels were taken into account  
34 for the analyses.  
35  
36  
37  
38  
39  
40

### 41 ***Weighting of the data***

42 All data were weighted using the SAS CALMAR (CALage sur MARGes) macro developed in France  
43 by the Institute of National Statistics (INSEE) to weight survey data to be representative of the French  
44 census population (50). Data used for weighting were sex, age and educational level.  
45  
46  
47  
48

### 49 ***Adherence to dietary recommendations***

50  
51 Adherence to French dietary recommendations was assessed using a modified version of the PNNS  
52 guidelines score (namely, the “*Programme National Nutrition Santé*”-guideline score, PNNS-GS),  
53 taking into account only dietary recommendations. The PNNS-GS development, including food  
54  
55  
56  
57  
58  
59  
60

1  
2 groupings, serving sizes, scoring, cut-off and penalties, has been previously described in detail (51).  
3  
4 Briefly, this 15-point score is based on French national guidelines and includes 13 components. The  
5  
6 eight components referring to food serving recommendations and four components referring to  
7  
8 moderation in consumption were included in the modified version of the PNNS-GS (mPNNS-GS)  
9  
10 (52). The last component focusing on adherence to physical activity recommendations was not taken  
11  
12 into account.  
13  
14

15 A penalty for overconsumption was assigned to individuals with energy intakes higher than estimated  
16  
17 energy expenditure (51). Age and self-reported weight and height at inclusion were used to estimate  
18  
19 Schofield's basal metabolic rate (BMR) (53). Energy expenditures were estimated using BMR and  
20  
21 physical activity level. In case of energy intake greater than 5% over the estimated energy expenditure,  
22  
23 an identical part was subtracted from the score. Quartiles of mPNNS-GS were computed and used  
24  
25 throughout the analyses.  
26  
27

### 28 ***Dietary clusters identification***

29  
30 The responses from the 13 "perception" questions were used in a multiple correspondence analysis,  
31  
32 which yielded 4 dimensions of FOP labelling perception. The dimensions were selected based on their  
33  
34 adjusted inertia (respectively 33.6%, 23.0%, 18.4% and 17.2% for a total of 92.3%). The selected  
35  
36 dimensions were used as input variables in a two-ways clustering procedure based on hierarchical and  
37  
38 K-means methods (SAS CLUSTER and FASCLUST procedures). The plot of semi-partial  $R^2$ , the  
39  
40 semi-partial  $T^2$  and the Cubic Clustering Criterion (CCC) by the number of clusters were used to  
41  
42 identify the optimal number of clusters.  
43  
44

### 45 ***Statistical analysis***

46  
47 All analyses were weighted according to the CALMAR macro, except the clustering procedure for  
48  
49 which no weighting option is available. The responses to each of the 13 questions were mapped across  
50  
51 clusters, in order to identify the FOP perception characteristics of each cluster. Socio-demographic,  
52  
53 lifestyle and dietary variables were mutually adjusted against clusters in a multivariable multinomial  
54  
55  
56  
57  
58  
59  
60

1  
2 regression. Adjusted-percentages for each socio-demographic, lifestyle and dietary characteristic were  
3 extracted from this procedure across clusters.  
4  
5

6  
7 All tests were two-sided and a P value <0.01 was considered significant, given the high number of  
8 statistical tests performed and the large sample size. Statistical analyses were performed using SAS  
9 Software (version 9.3, SAS Institute Inc, Cary, NC, USA).  
10  
11  
12

## 13 14 **RESULTS**

15  
16 Overall, 38,604 subjects completed the questionnaire on the perceptions of FOP labels. Among these,  
17 714 (1.85%) were excluded because they never engaged in grocery shopping. Among the 37,890  
18 remaining subjects, 16,188 (42.72%) were excluded for incomplete data on covariates (the vast  
19 majority of which (N=13,066, 80.71% of excluded subjects) for incomplete data on mPNNS-GS  
20 computation, which requires the presence of three 24h records, frequency questionnaire on alcohol  
21 consumption and frequency of seafood consumption, leading to an overall sample of 21,702  
22 participants for analysis (e.g. 56.22%).  
23  
24  
25  
26  
27  
28  
29

30  
31 Characteristics of the crude and weighted sample are presented in **Table 1**. The crude sample  
32 exhibited a higher percentage of females (73.42%), older subjects (68.36% were ≥ 50 years-old),  
33 educated (37.54% had above 2 years of university training) and with high incomes (38.49% had  
34 incomes >2700€/month).  
35  
36  
37  
38  
39

40 Overall, the Nutriscore was the label receiving the most important number of favourable responses on  
41 positive perception dimensions by participants, followed by MTL and SENS (43.79% of participants  
42 considered the Nutriscore as their preferred FOP label, followed by 24.92% for MTL and 17.17% for  
43 SENS) (**Table 2**). Conversely, RIs yielded the highest number of responses on negative dimensions of  
44 perception (complexity and time processing). A majority of participants considered that none of the  
45 proposed labels were guilt-laden (50.23%), followed by SENS (21.19%)  
46  
47  
48  
49  
50

51  
52 The clustering procedure resulted in the identification of 5 mutually exclusive groups of subjects  
53 according to their perception of FOP nutrition labels. Clusters represented 43.23% (crude N=9,399),  
54 27.31% (crude N=6,163), 17.05% (crude N=3,546), 7.31% (crude N=1,632) and 5.10% (crude N=965)  
55  
56  
57  
58  
59

of participants, respectively. The mapping of perception responses across clusters showed that each cluster was characterized by a marked preference for one of the proposed FOP nutrition label formats: Cluster 1 displayed a marked preference for the Nutriscore, Cluster 2 for the MTL, Cluster 3 for the SENS, Cluster 4 for the RIs and Cluster 5 for none of the presented labels (**Figure 2**). Therefore, clusters were termed according to their label preference. These preferences across cluster were particularly prominent for the following aspects: label wanted on the front of the packages (>85% for each specific FOP label in their respective cluster), preferred label (>80% for each specific label in their respective cluster), label allowing to choose healthier products (>65% for each specific label in their respective cluster), trustworthiness (>74% for each specific label in their respective cluster) (**Figure 2**). However, for some dimensions of perception, responses were somewhat less marked for each specific FOP label, and more concurrent across clusters. For example, >23% of participants in all clusters considered that the Nutriscore was quick to process, >19% considered it easy to identify, and >17% considered it easy to understand (**Figure 2**). Conversely, >20% of participants in all clusters considered the mRIs to be too complex for understanding (except in its own where it obtained 10.90% of opinions), >19% considered it too long to understand (except in its own cluster, with 12.73% of opinions), and was considered as the least appreciated FOP nutrition label for 66.88% of subjects in the Cluster Nutriscore, 61.86% of subjects in the Cluster SENS, 39.88% of subjects in the Cluster MTL and 10.78% of subjects in the Cluster None (**Figure 2**). Finally, participants considered that none of the presented labels was guilt-laden: 87.12% of Cluster None, 49.93% of Cluster Nutriscore, 47.89% of Cluster MTL, 47.80% of Cluster mRIs and 44.78% of Cluster SENS (**Figure 2**).

Multivariable adjusted socio-demographic characteristics according to specific clusters are shown in **Table 3**. Less educated subjects were more frequent in Cluster None and Cluster mRIs and highly educated subjects in Cluster MTL (**Table 2**). Smokers were more likely in Cluster None, while never smokers were more likely in Cluster Nutriscore. Subjects with low physical activity were more likely in Cluster SENS and Cluster Nutriscore (**Table 2**). Finally, subjects with lower adherence to dietary recommendations (Quartile 1 of mPNNS-GS) were more likely in Cluster None and Cluster

1  
2  
3 Nutriscore while subjects with high adherence to dietary recommendations (Quartile 4 of mPNNS-GS)  
4 were more likely in Cluster mRIs and Cluster MTL (**Table 2**).

## 7 **DISCUSSION**

9  
10 Our study showed that the perception of FOP labels can be clustered according to consistent  
11 preferences for specific formats. Among the proposed labels in the current French debate, the  
12 Nutriscore appeared to be the most preferred format, followed by MTL. Moreover, though each cluster  
13 presented marked preferences for one type of format or another, the Nutriscore appeared to reach to  
14 participants beyond its specific cluster, as it was considered easy to identify and understand by a  
15 significant number of participants in other clusters. Finally, socio-demographic characteristics  
16 appeared to be associated with each cluster, with a specific cluster (Cluster 5, None), concentrating  
17 high percentages of subjects presenting disadvantaged socio-demographic characteristics (lower levels  
18 of education) and lifestyle risks (smoking, low level of physical activity and low adherence to dietary  
19 recommendations).

20  
21 Compared to a previous study conducted in early 2015 using a similar methodology and among  
22 participants in the same cohort study, the results of the present analyses show that the reach of the  
23 Nutriscore has somewhat broadened since then (25). The Nutriscore appeared to have a wide reach in  
24 the population, and to appeal to subjects with lower adherence to dietary recommendations. This result  
25 shows that the Nutriscore may be an effective complementary strategy to current public health  
26 nutrition policies, which promote healthy eating through widely disseminated nutritional  
27 recommendations (54). Though this strategy has led to an increase in the knowledge of nutritional  
28 recommendations, consumers somehow struggle to translate such advice into action (55;56).

29  
30 Disseminated nutrition information is suggested to appeal more to those already having the capacity to  
31 implement nutritional knowledge (through higher education or income), and may lead to an increase in  
32 social disparities in health (57;58). Therefore, the fact that the Nutriscore appears to appeal to subjects  
33 with low adherence to nutrition recommendations may be a key element to help translating nutritional  
34 recommendations into practice, in particular for those with low nutritional knowledge.



1  
2  
3 The MTL appeared as the second preferred FOP label in the population, particularly in younger  
4 subjects, with university education and lower incomes. Moreover it was considered to be providing  
5 reliable and useful information beyond its own cluster. The fact that direct numeric information on  
6 nutrient content (such as the information provided by mRIs) received a much lower support in the  
7 population shows that the appeal of the MTL is very probably associated with the colour feature of  
8 this FOP label (59), as multiple numeric information are typically considered difficult to understand  
9 (60). Indeed, compared to mRIs, the MTL only adds an interpretation of the level of nutrients using a  
10 colour-coding. However, the interpretation of the colour-coding has appeared to be challenging in  
11 certain populations (59). Indeed, MTL is a nutrient-specific FOP label, giving individual information  
12 for energy and four nutrients (sugars, fat, saturated fat and salt). Multiple nutrient-related information  
13 implies first that consumers are able to identify the nutrients that are referred to, and second, that they  
14 are able to prioritize the information provided for each nutrient (42;61). Indeed, MTL can lead to  
15 conflicting choice options: for example, the comparison between two products, with the same number  
16 of nutrients coded in 'red', but not for the same nutrients (e.g. one with a 'red' code for sugar and the  
17 other for saturated fatty acids) implies for the consumer to be able to single out one of the nutrients in  
18 order to make a choice (21). These characteristics of the label may in part explain the fact that the  
19 MTL appeared to appeal more particularly to young, educated subjects with a high level of adherence  
20 to nutritional recommendations. This more favourable perception among these participants may stem  
21 from their higher nutritional knowledge, which allows them to better interpret the label and act upon it  
22 in purchasing situations (21;60). However, this specific reach in terms of population might also lead to  
23 widen inequalities in health and nutrition if implemented in the overall population (62).

24  
25  
26  
27  
28  
29  
30  
31  
32  
33  
34  
35  
36  
37  
38  
39  
40  
41  
42  
43  
44  
45 The SENS system was the preferred system for 17% of the population, more particularly in  
46 households with children. The graphical system the SENS originated from was developed by a  
47 marketing team from a retailer in September 2014, and received later support from the French  
48 retailers' federation (37). As for Nutriscore or MTL, it is based on colour coding (though not based on  
49 the polychromatic Green-Red scale), with the addition of recommended frequencies of consumption  
50 for each level of the label. This latter feature may in part explain the higher appeal of the SENS system  
51  
52  
53  
54  
55  
56  
57  
58  
59  
60



1  
2  
3 on participants with children, as it gives a more specific guidance for consumption, which can be used  
4 for children. However, these specific consumption frequencies for each level of the label could also be  
5 interpreted as an oversimplification and a form of paternalism for many consumers (63). This may be  
6 one of the reasons the SENS label was considered as a guilt-laden label for 21.2% of the population.  
7  
8

9  
10  
11 Moreover, though Nutriscore and MTL rely on the well-known polychromatic scale from green to red  
12 (corresponding to recognized signals), which are easier to interpret, the SENS colour-coding does not  
13 refer directly to any known colour scale (its levels are Green-Blue-Orange-Purple). Colours are  
14 considered helpful to generally increase the salience of a FOP label, however, studies that have shown  
15 a specific advantage of colour-coding have used readily interpretative colour-coding (63-66). In the  
16 study by Bialkova et al., which used polychromatic RIs, but with no readily-interpretative colours  
17 (yellow, orange, purple, blue), the polychromatic RIs indeed had lower performance than  
18 monochromatic RIs (64). Therefore, beyond preference only, the use of highly interpretable colours  
19 (e.g. 'Green' and 'Red') in a FOP labelling system might be an important feature of a colour coding.  
20  
21  
22  
23  
24  
25  
26  
27  
28

29  
30 Finally, our study shows that a portion of the population appeared to disregard or even reject FOP  
31 nutrition labels entirely. Indeed, participants in Cluster 5 (None, corresponding to 5.1% of the  
32 population) consistently responded 'None' for all dimensions of perception that were investigated.  
33  
34

35  
36 Moreover, the socio-demographic characteristics of this specific population suggested that they may in  
37 fact be more vulnerable and more at nutritional risk than the rest of the population. Indeed, this cluster  
38 included more specifically older participants, subjects with lower educational levels, current smokers  
39 and subjects with lower adherence to nutritional recommendations. This result is in line with a study in  
40 Australia showing that males and subjects with lower socio-economic status were more likely to report  
41 no preference for a FOP label (67). These results also pose a challenge to the design of efficient public  
42 health policies, as some of the subjects who would certainly benefit from them appear to reject them.  
43  
44

45  
46 Novel and targeted interventions in public health nutrition should therefore be devised to appeal to this  
47 vulnerable population to entice them towards healthier diets, taking into account the broader  
48 environment related to risk behaviours (68). Alternatively, policies targeting the environment, and not  
49  
50  
51  
52  
53  
54  
55  
56  
57  
58  
59  
60

1  
2  
3 depending on individual choices, such as the reformulation of existing products, may have an indirect  
4 impact on these populations (69).

5  
6  
7 Strengths of our study include its large sample size, and the use of validated dietary collection data,  
8 using repeated dietary records (40). Moreover, we were able to investigate multiple dimensions of the  
9 perception of FOP labels (awareness, liking, perceived cognitive workload and trustworthiness),  
10 across various formats that are currently proposed in the French debate on FOP nutrition labelling.  
11 Finally, we were able to identify clustered preferences towards each type of format, and relate them to  
12 socio-demographic and dietary factors, which highly contributed to the interpretation of such  
13 preferences in a public health perspective.  
14  
15  
16  
17  
18  
19  
20  
21

22 Our study is subject to some limitations. First, our sample consists of volunteer subjects included in a  
23 cohort study on nutrition, who are therefore more likely health conscious. However, our data shows a  
24 wide variety of dietary profiles, somewhat lessening the importance of this bias. Moreover, the use of  
25 weighting partially controlled for the selection bias of our study population (70). Second, our study  
26 focused on the perception of FOP labels, and not on understanding or use of FOP labels in purchasing  
27 situations. However, following the theoretical framework for the use of FOP nutrition labels,  
28 favourable perception is a crucial pre-requisite for the efficiency of a given label (71;72). Third, the  
29 participants in the NutriNet-Santé study had already been involved in a previous survey on the  
30 perception of various FOP nutrition labels (25). However, the formats presented in the two versions of  
31 the questionnaire were somewhat different, and the delay between the two questionnaires of more than  
32 a year, therefore limiting the familiarity of the participants with the FOP nutrition labels formats  
33 displayed in this study. However, the participants were aware of FOP nutrition labelling, which could  
34 have affected their responses. Finally, the measures used in this study were not thoroughly validated  
35 but based on scientific literature. They derived from previously published work which took into  
36 account the literature on the perception of FOP nutrition labelling (42;61;73).  
37  
38  
39  
40  
41  
42  
43  
44  
45  
46  
47  
48  
49  
50  
51

52 To conclude, FOP nutrition labels could be useful strategies to tackle social inequalities in nutrition  
53 and health, provided that the graphical format that is selected has a wide reach in the population. This  
54  
55  
56  
57  
58  
59  
60

1  
2  
3 is all the more important that subjects who are more concerned about their diet (and more likely to  
4 have a healthier diet), are also more likely to use a nutrition label when grocery shopping (20). As  
5 such, the Nutriscore, which has a favourable perception among subjects with low adherence to  
6 nutritional recommendations, may be a helpful strategy to lead them towards healthier diets.  
7  
8  
9  
10  
11  
12  
13  
14  
15  
16  
17  
18  
19  
20  
21  
22  
23  
24  
25  
26  
27  
28  
29  
30  
31  
32  
33  
34  
35  
36  
37  
38  
39  
40  
41  
42  
43  
44  
45  
46  
47  
48  
49  
50  
51  
52  
53  
54  
55  
56  
57  
58  
59  
60

## AKNOWLEDGEMENTS

The authors especially thank Nathalie Arnault for data management, data cleaning and statistical analyses.

We especially thank Younes Esseddik, Paul Flanzky and Thi Hong Van Duong, computer scientists; Veronique Gourlet, Fabien Szabo, Nathalie Arnault, Laurent Bourhis and Stephen Besseau, statisticians; and Cédric Agaësse, Claudia Chahine, dieticians.

We warmly thank all of the dedicated and conscientious volunteers involved in the Nutrinet-Santé cohort.

## Reference List

1. World Health Organization. Global Health Risks: Mortality and burden of disease attributable to selected major risks. 2009. Geneva, WHO.
2. DREES. L'état de santé de la population en France- Suivi des objectifs annexés à la loi de santé publique. Rapport 2011. Danet, S. 2011. Paris, Direction des études de l'évaluation et des statistiques (DRESS) - Collection Etudes et Statistiques.
3. World Health Organization. Obesity: Preventing and managing the global epidemic. Report of a WHO consultation. WHO Technical Report Series 894. 2000. Geneva, WHO.
4. World Health Organization. Diet, Nutrition and the prevention of chronic diseases. Report of a joint WHO/FAO expert consultation. WHO Technical Report Series N°916. 2003. Geneva, WHO.
5. World Health Organization. Global strategy on diet, physical activity and health. 2004. Geneva, WHO.
6. Hughes R. Competencies for effective public health nutrition practice: a developing consensus. *Public Health Nutr* 2004;7:683-91.
7. Serra-Majem L. Moving forward in public health nutrition - the I World Congress of Public Health Nutrition - Introduction. *Nutrition Reviews* 2009;67:S2-S6.
8. Lachat C, Van Camp J, De Henauw S et al. A concise overview of national nutrition action plans in the European Union Member States. *Public Health Nutr* 2005;8:266-74.
9. Hercberg S, Chat-Yung S, Chauillac M. The French National Nutrition and Health Program: 2001-2006-2010. *International Journal of Public Health* 2008;53:68-77.
10. Institut National de Prévention et d'Education pour la Santé. La santé vient en mangeant. Le guide alimentaire pour tous. Paris: INPES, 2002.
11. Institut National de Prévention et d'Education pour la Santé. La santé vient en mangeant et en bougeant. Le guide nutrition des enfants et ados pour tous les parents. Paris: INPES, 2004.
12. Azais-Braesco V, Goffi C, Labouze E. Nutrient profiling: comparison and critical analysis of existing systems. *Public Health Nutr* 2006;9:613-22.
13. Hercberg, S. Propositions pour un nouvel élan de la politique nutritionnelle française de santé publique dans le cadre de la stratégie nationale de santé. 1ère partie : mesures concernant la prévention nutritionnelle. 2013. Paris. 28-5-2014.
14. Journal Officiel de la République Française. JORF n°0022 du 27 janvier 2016. texte n° 1. LOI n° 2016-41 du 26 janvier 2016 de modernisation de notre système de santé. 27-1-2016. Paris, JORF.
15. Food Standards Agency. Signposting and traffic light labeling. 2010. London, FSA. 10-2-2015.

16. Choices International Foundation. Product Criteria v2.2. 2011. 18-6-2014.
17. Asp NG, Bryngelsson S. Health claims in the labelling and marketing of food products: the Swedish food sector's Code of Practice in a European perspective. *Food & Nutrition Research*; Vol 51, No 3 (2007) 2007.
18. Commonwealth of Australia. Health Star Rating System. A joint Australian, state and territory governments initiatives in partnership with industry, public health and consumer groups. 2015. Commonwealth of Australia. 22-4-2015.
19. Feunekes GI, Gortemaker IA, Willems AA, Lion R, Van den Kommer M. Front-of-pack nutrition labelling: Testing effectiveness of different nutrition labelling formats front-of-pack in four European countries. *Appetite* 2008;50:57-70.
20. Van Kleef E, Dagevos H. The Growing Role of Front-of-Pack Nutrition Profile Labeling: A Consumer Perspective on Key Issues and Controversies. *Crit Rev Food Sci Nutr* 2015;55:291-303.
21. Cowburn G, Stockley L. Consumer understanding and use of nutrition labelling: a systematic review. *Public Health Nutrition* 2005;8:21-8.
22. Adriouch S, Julia C, Kesse-Guyot E et al. Prospective association between a dietary quality index based on a nutrient profiling system and cardiovascular disease risk. *European Journal of Preventive Cardiology* 2016;23:1669-76.
23. Donnenfeld M, Julia C, Kesse-Guyot E et al. Prospective association between cancer risk and an individual dietary index based on the British Food Standards Agency Nutrient Profiling System. *Br J Nutr* 2015;114:1702-10.
24. Ducrot P, Mejean C, Julia C et al. Objective Understanding of Front-of-Package Nutrition Labels among Nutritionally At-Risk Individuals. *Nutrients* 2015;7:7106-25.
25. Ducrot P, Mejean C, Julia C et al. Effectiveness of Front-Of-Pack Nutrition Labels in French Adults: Results from the NutriNet-Sante Cohort Study. *Plos One* 2015;10:e0140898.
26. Ducrot P, Julia C, Mejean C et al. Impact of Different Front-of-Pack Nutrition Labels on Consumer Purchasing Intentions A Randomized Controlled Trial. *Am J Prev Med* 2016;50:627-36.
27. Julia C, Touvier M, Mejean C et al. Development and validation of an individual dietary index based on the British Food Standard Agency nutrient profiling system in a French context. *J Nutr* 2014;144:2009-17.
28. Julia C, Ducrot P, Peneau S et al. Discriminating nutritional quality of foods using the 5-Color nutrition label in the French food market: consistency with nutritional recommendations. *Nutr J* 2015;14:100.
29. Julia C, Ducrot P, Lassale C et al. Prospective associations between a dietary index based on the British Food Standard Agency nutrient profiling system and 13-year weight gain in the SU.VI.MAX cohort. *Prev Med* 2015;81:189-94.

- 1  
2  
3 30. Julia C, Kesse-Guyot E, Ducrot P et al. Performance of a five category front-of-pack  
4 labelling system - the 5-colour nutrition label - to differentiate nutritional quality of breakfast cereals  
5 in France. *BMC Public Health* 2015;15:179.  
6  
7 31. Julia C, Fezeu LK, Ducrot P et al. The Nutrient Profile of Foods Consumed Using the  
8 British Food Standards Agency Nutrient Profiling System Is Associated with Metabolic Syndrome in  
9 the SU.VI.MAX Cohort. *J Nutr* 2015;145:2355-61.  
10  
11 32. Julia C, Mejean C, Touvier M et al. Validation of the FSA nutrient profiling system  
12 dietary index in French adults-findings from SUVIMAX study. *Eur J Nutr* 2016;55:1901-10.  
13  
14 33. Julia C, Kesse-Guyot E, Touvier M, Mejean C, Fezeu L, Hercberg S. Application of  
15 the British Food Standards Agency nutrient profiling system in a French food composition database.  
16 *The British journal of nutrition* 2014;112:1699-705.  
17  
18 34. Julia C, Blanchet O, Méjean C et al. Impact of the front-of-pack 5-colour nutrition  
19 label (5-CNL) on the nutritional quality of purchases: an experimental study. *International Journal of*  
20 *Behavioral Nutrition and Physical Activity* 2016;13:1-9.  
21  
22 35. ANSES. Evaluation de la faisabilité du calcul d'un score nutritionnel tel qu'élaboré par  
23 Rayner et al. Rapport d'appui scientifique et technique. 2015. Maison Alfort, ANSES. 9-11-2015.  
24  
25 36. Haut Conseil de la Santé Publique. Avis relatif à l'information sur la qualité  
26 nutritionnelle des produits alimentaires. 2015. Paris, HCSP. 9-11-2015.  
27  
28 37. Julia C, Hercberg S. Research and lobbying conflicting on the issue of a front-of-pack  
29 nutrition labelling in France. *Archives of Public Health* 2016;74:51.  
30  
31 38. Hercberg S, Castetbon K, Czernichow S et al. The Nutrinet-Sante Study: a web-based  
32 prospective study on the relationship between nutrition and health and determinants of dietary patterns  
33 and nutritional status. *Bmc Public Health* 2010;10.  
34  
35 39. Touvier M, Mejean C, Kesse-Guyot E et al. Comparison between web-based and  
36 paper versions of a self-administered anthropometric questionnaire. *Eur J Epidemiol* 2010;25:287-96.  
37  
38 40. Touvier M, Kesse-Guyot E, Mejean C et al. Comparison between an interactive web-  
39 based self-administered 24 h dietary record and an interview by a dietitian for large-scale  
40 epidemiological studies. *Br J Nutr* 2011;105:1055-64.  
41  
42 41. Vergnaud AC, Touvier M, Mejean C et al. Agreement between web-based and paper  
43 versions of a socio-demographic questionnaire in the NutriNet-Sante study. *Int J Public Health*  
44 2011;56:407-17.  
45  
46 42. Mejean C, Macouillard P, Peneau S, Hercberg S, Castetbon K. Consumer acceptability  
47 and understanding of front-of-pack nutrition labels. *Journal of Human Nutrition and Dietetics*  
48 2013;26:494-503.  
49  
50 43. INSEE (Institut National de la Statistique et des Etudes Economiques). Méthodes.  
51 2014. 17-3-2014.  
52  
53 44. Craig CL, Marshall AL, Sjostrom M et al. International physical activity  
54 questionnaire: 12-country reliability and validity. *Med Sci Sports Exerc* 2003;35:1381-95.  
55  
56  
57  
58  
59  
60

- 1  
2  
3 45. Hercberg S, Deheeger M, Preziosi P. SU.VI.MAX Portions alimentaires. Manuel  
4 photos pour l'estimation des quantités. Paris: Editions polytechnica, 2002.  
5  
6 46. Etude Nutrinet-Santé. Table de composition des aliments de l'étude Nutrinet-Santé.  
7 Paris: Economica, 2013.  
8  
9 47. Black AE. Critical evaluation of energy intake using the Goldberg cut-off for energy  
10 intake: basal metabolic rate. A practical guide to its calculation, use and limitations. *Int J Obes Relat*  
11 *Metab Disord* 2000;24:1119-30.  
12  
13 48. Lassale C, Galan P, Julia C, Fezeu L, Hercberg S, Kesse-Guyot E. Association  
14 between adherence to nutritional guidelines, the metabolic syndrome and adiposity markers in a  
15 French adult general population. *Plos One* 2013;8:e76349.  
16  
17 49. Lassale C, Peneau S, Touvier M et al. Validity of web-based self-reported weight and  
18 height: results of the Nutrinet-Sante study. *J Med Internet Res* 2013;15:e152.  
19  
20 50. INSEE (Institut National de la Statistique et des Etudes Economiques). La macro SAS  
21 CALMAR. 2016. 19-12-2016.  
22  
23 51. Estaquio C, Kesse-Guyot E, Deschamps V et al. Adherence to the French Programme  
24 National Nutrition Sante Guideline Score Is Associated with Better Nutrient Intake and Nutritional  
25 Status. *J Am Diet Assoc* 2009;109:1031-41.  
26  
27 52. Assmann KE, Lassale C, Galan P, Hercberg S, Kesse-Guyot E. Dietary Quality and 6-  
28 Year Anthropometric Changes in a Sample of French Middle-Aged Overweight and Obese Adults.  
29 *Plos One* 2014;9.  
30  
31 53. Schofield WN. Predicting basal metabolic rate, new standards and review of previous  
32 work. *Hum Nutr Clin Nutr* 1985;39 Suppl 1:5-41.  
33  
34 54. Hercberg S, Chat-Yung S, Chauliac M. The French National Nutrition and Health  
35 Program: 2001-2006-2010. *Int J Public Health* 2008;53:68-77.  
36  
37 55. Escalon H, Beck F, Bossard C. Associations entre la connaissance des  
38 recommandations du Programme national nutrition santé et les comportements en matière  
39 d'alimentation et d'activité physique. *Revue d'épidémiologie et de Santé Publique* 2013;61:37-47.  
40  
41 56. Worsley A. Nutrition knowledge and food consumption: can nutrition knowledge  
42 change food behaviour? *Asia Pacific Journal of Clinical Nutrition* 2002;11:S579-S585.  
43  
44 57. Backholer K, Beauchamp A, Ball K et al. A Framework for Evaluating the Impact of  
45 Obesity Prevention Strategies on Socioeconomic Inequalities in Weight. *Am J Public Health*  
46 2014;104:E43-E50.  
47  
48 58. Beauchamp A, Backholer K, Magliano D, Peeters A. The effect of obesity prevention  
49 interventions according to socioeconomic position: a systematic review. *Obesity Reviews*  
50 2014;15:541-54.  
51  
52 59. Hawley KL, Roberto CA, Bragg MA, Liu PJ, Schwartz MB, Brownell KD. The  
53 science on front-of-package food labels. *Public Health Nutrition* 2013;16:430-9.  
54  
55  
56  
57  
58  
59



- 1  
2  
3 60. Campos S, Doxey J, Hammond D. Nutrition labels on pre-packaged foods: a  
4 systematic review. *Public Health Nutrition* 2011;14:1496-506.  
5  
6 61. Mejean C, Macouillard P, Peneau S, Hercberg S, Castetbon K. Perception of front-of-  
7 pack labels according to social characteristics, nutritional knowledge and food purchasing habits.  
8 *Public Health Nutrition* 2013;16:392-402.  
9  
10 62. Frohlich KL, Potvin L. Transcending the known in public health practice: the  
11 inequality paradox: the population approach and vulnerable populations. *Am J Public Health*  
12 2008;98:216-21.  
13  
14 63. van HE, Trijp HC. Front-of-pack nutrition labels. Their effect on attention and choices  
15 when consumers have varying goals and time constraints. *Appetite* 2011;57:148-60.  
16  
17 64. Bialkova S, van Trijp H. What determines consumer attention to nutrition labels?  
18 *Food Quality and Preference* 2010;21:1042-51.  
19  
20 65. Jones G, Richardson M. An objective examination of consumer perception of nutrition  
21 information based on healthiness ratings and eye movements. *Public Health Nutrition* 2007;10:238-44.  
22  
23 66. Kelly B, Hughes C, Chapman K et al. Consumer testing of the acceptability and  
24 effectiveness of front-of-pack food labelling systems for the Australian grocery market. *Health*  
25 *Promotion International* 2009;24:120-9.  
26  
27 67. Pettigrew S, Talati Z, Miller C, Dixon H, Kelly B, Ball K. The types and aspects of  
28 front-of-pack food labelling schemes preferred by adults and children. *Appetite* 2016;109:115-23.  
29  
30 68. Pampel FC, Krueger PM, Denney JT. Socioeconomic Disparities in Health Behaviors.  
31 *Annu Rev Sociol* 2010;36:349-70.  
32  
33 69. Story M, Kaphingst KM, Robinson-O'Brien R, Glanz K. Creating healthy food and  
34 eating environments: Policy and environmental approaches. PALO ALTO: ANNUAL REVIEWS,  
35 2008.  
36  
37 70. Andreeva VA, Salanave B, Castetbon K et al. Comparison of the sociodemographic  
38 characteristics of the large NutriNet-Sante e-cohort with French Census data: the issue of volunteer  
39 bias revisited. *J Epidemiol Community Health* 2015;69:893-8.  
40  
41 71. Grunert KG, Wills JM. A review of European research on consumer response to  
42 nutrition information on food labels. *J Public Health* 2007;15:385-99.  
43  
44 72. Grunert KG, Fernandez-Celemin L, Wills JM, Storcksdieck Genannt BS, Nureeva L.  
45 Use and understanding of nutrition information on food labels in six European countries. *Z Gesundh*  
46 *Wiss* 2010;18:261-77.  
47  
48 73. Mejean C, Macouillard P, Peneau S, Lassale C, Hercberg S, Castetbon K. Association  
49 of Perception of Front-of-Pack Labels with Dietary, Lifestyle and Health Characteristics. *Plos One*  
50 2014;9.  
51  
52  
53  
54  
55  
56  
57  
58  
59  
60

1  
2  
3  
4  
5  
6  
7  
8  
9  
10  
11  
12  
13  
14  
15  
16  
17  
18  
19  
20  
21  
22  
23  
24  
25  
26  
27  
28  
29  
30  
31  
32  
33  
34  
35  
36  
37  
38  
39  
40  
41  
42  
43  
44  
45  
46  
47  
48  
49  
50  
51  
52  
53  
54  
55  
56  
57  
58  
59  
60

For peer review only

## FIGURE LEGENDS

**Figure 1:** Formats proposed for a front-of-pack nutrition label in France.

Caption:

Nutriscore developed by the EREN research team, is based on the British Food Standards Agency nutrient profiling system and presents for each food or beverage the overall nutritional quality on a five-point colour-code scale from Green to Red.

SENS, supported by retailers, is based on a nutrient profiling system developed by a research team, and presents for each food or beverage a recommended frequency of consumption, with a four points colour-coded scale (Green, Blue, Orange, Purple)

Multiple Traffic Lights, supported by industry, and implemented in Great Britain since 2005 presents the numeric values of the contribution of a portion of the food to the intakes in a balanced diet (in grams and percentage of reference intakes, corresponding to the reference intakes label, RI) for energy, fats, saturated fats, sugar and sodium, with a colour-coding (Green, Amber and Red) for each of these components of the food

Modified Reference Intakes (mRIs) present the numeric values of the reference intakes, in both grams and percentage of reference intakes, with bars varying in height depending on the amount of the component in the food.

**Figure 2:** Responses to each of the dimensions of perception in the various clusters

Caption: Each circle represents a cluster, each response to a dimension is scaled within the cluster.

Positive dimensions are situated on the right hand side of the figure, while negative dimensions are situated on the left hand side of the figure

Table 1 Characteristics of the study population, crude and after weighting

|                                    |                             | Crude |       | Weighted |
|------------------------------------|-----------------------------|-------|-------|----------|
|                                    |                             | n     | %     | %        |
| <b>Sex</b>                         |                             |       |       |          |
|                                    | Men                         | 5768  | 26.58 | 39.97    |
|                                    | Women                       | 15934 | 73.42 | 60.03    |
| <b>Age</b>                         |                             |       |       |          |
|                                    | 18-29 years-old             | 968   | 4.46  | 12.28    |
|                                    | 30-49 years-old             | 5900  | 27.19 | 31.05    |
|                                    | 50-64 years-old             | 7899  | 36.40 | 29.39    |
|                                    | ≥ 65 years old              | 6935  | 31.96 | 27.28    |
| <b>Educational level</b>           |                             |       |       |          |
|                                    | Up to secondary             | 6804  | 31.35 | 70.54    |
|                                    | University, up to two years | 6750  | 31.10 | 13.86    |
|                                    | University, ≥ 3 years       | 8148  | 37.54 | 15.60    |
| <b>Income per consumption unit</b> |                             |       |       |          |
|                                    | <1200/month                 | 2068  | 9.53  | 20.28    |
|                                    | [1200 - 1800[ €/month       | 4766  | 21.96 | 30.24    |
|                                    | [1800 - 2700[ €/month       | 6514  | 30.02 | 28.67    |
|                                    | ≥ 2700 €/month              | 8354  | 38.49 | 20.81    |
| <b>Household composition</b>       |                             |       |       |          |
|                                    | Adults only                 | 17118 | 78.88 | 78.05    |
|                                    | Adults and children         | 4584  | 21.12 | 21.95    |
| <b>Smoking status</b>              |                             |       |       |          |
|                                    | Current smoker              | 1923  | 8.86  | 10.16    |
|                                    | Former smoker               | 8710  | 40.13 | 39.81    |
|                                    | Never smoker                | 11069 | 51.00 | 50.03    |
| <b>Physical activity level</b>     |                             |       |       |          |
|                                    | High                        | 8007  | 36.90 | 39.01    |
|                                    | Moderate                    | 9128  | 42.06 | 37.28    |
|                                    | Low                         | 4567  | 21.04 | 23.72    |
| <b>mPNNS-GS</b>                    |                             |       |       |          |
|                                    | Quartile 1                  | 5425  | 25.00 | 23.70    |
|                                    | Quartile 2                  | 5582  | 25.72 | 23.86    |
|                                    | Quartile 3                  | 5933  | 27.34 | 26.20    |
|                                    | Quartile 4                  | 4762  | 21.94 | 26.24    |

Weighting was obtained using the SAS CALMAR Macro

1  
2  
3  
4  
5  
6  
7  
8  
9  
10  
11  
12  
13  
14  
15  
16  
17  
18  
19  
20  
21  
22  
23  
24  
25  
26  
27  
28  
29  
30  
31  
32  
33  
34  
35  
36  
37  
38  
39  
40  
41  
42  
43  
44  
45  
46  
47

Online Supplemental material

**Table 2 Crude percentage of responses to the dimensions of perception of FOP labels**

|                                                        | Nutriscore | MTL   | SENS  | mRIs  | None  |
|--------------------------------------------------------|------------|-------|-------|-------|-------|
| This FOP label is helpful to choose healthier products | 40.02      | 26.93 | 17.33 | 9.14  | 6.57  |
| I want to see this FOP label on the front of packages  | 44.22      | 25.15 | 17.15 | 7.43  | 6.05  |
| This is my preferred FOP label                         | 43.79      | 24.92 | 17.17 | 6.68  | 7.45  |
| This FOP label provides me with the information I need | 24.51      | 43.06 | 15.78 | 11.44 | 5.21  |
| This FOP label is trustworthy                          | 37.64      | 28.83 | 15.23 | 8.52  | 9.79  |
| This FOP label provides reliable information           | 26.76      | 40.32 | 10.55 | 11.75 | 10.62 |
| This FOP label is easy to identify                     | 62.53      | 8.78  | 21.37 | 2.75  | 4.56  |
| This label is easy to understand                       | 52.22      | 7.86  | 33.5  | 3.43  | 2.99  |
| This FOP label is quick to process                     | 64.09      | 8.07  | 22.27 | 2.9   | 2.68  |
| This FOP label is too complex for understanding        | 4.49       | 19.9  | 5.7   | 48.22 | 21.7  |
| This FOP label takes too long to understand            | 2.52       | 25.45 | 2.86  | 50.81 | 18.36 |
| This is the FOP label I appreciate the least           | 9.67       | 12.58 | 17.44 | 51.33 | 8.98  |
| This FOP label is guilt-laden                          | 12.42      | 9.32  | 21.19 | 6.83  | 50.23 |

## Online Supplemental material

Table 3 Multivariable adjusted socio-demographic, lifestyle and dietary characteristics according to the various clusters of preference for FOP nutrition labeling

|                                    |                       | Nutriscore   | MTL          | SENS         | mRIs         | None         | <i>P</i> |
|------------------------------------|-----------------------|--------------|--------------|--------------|--------------|--------------|----------|
|                                    |                       | 43.23        | 27.31        | 17.05        | 7.31         | 5.10         |          |
| <b>Sex</b>                         |                       |              |              |              |              |              | <0,0001  |
|                                    | Men                   | <b>41.88</b> | 37.23        | 37.48        | <b>35.67</b> | 40.14        |          |
|                                    | Women                 | 58.12        | 62.77        | 62.52        | 64.33        | 59.86        |          |
| <b>Age</b>                         |                       |              |              |              |              |              | <0,0001  |
|                                    | 18-29 years-old       | 11.11        | <b>13.90</b> | 11.06        | 11.82        | 3.93         |          |
|                                    | 30-49 years-old       | 64.66        | 68.43        | 67.53        | 66.86        | 64.92        |          |
|                                    | 50-64 years-old       | 21.40        | 15.86        | 19.04        | 18.05        | 25.76        |          |
|                                    | ≥ 65 years old        | 2.84         | 1.81         | 2.37         | 3.27         | <b>5.40</b>  |          |
| <b>Educational level</b>           |                       |              |              |              |              |              | <0,0001  |
|                                    | Up to secondary       | 72.64        | 67.59        | 72.05        | 77.71        | <b>77.84</b> |          |
|                                    | University, up to two | 15.26        | 16.81        | 15.72        | 12.79        | 12.21        |          |
|                                    | University, ≥ 3 years | 12.09        | <b>15.61</b> | 12.23        | 9.50         | 9.95         |          |
| <b>Income per consumption unit</b> |                       |              |              |              |              |              | <0,0001  |
|                                    | <1200/month           | 14.57        | <b>20.07</b> | 16.36        | 17.17        | 13.95        |          |
|                                    | [1200 - 1800[ €/month | 32.61        | 31.47        | 35.57        | 35.71        | 36.83        |          |
|                                    | [1800 - 2700[ €/month | 30.96        | 29.29        | 29.41        | 29.17        | 30.45        |          |
|                                    | ≥ 2700 €/month        | <b>21.85</b> | 19.16        | 18.66        | 17.96        | 18.77        |          |
| <b>Household composition</b>       |                       |              |              |              |              |              | <0,0001  |
|                                    | Adults only           | 87.76        | 88.57        | 86.99        | 88.60        | <b>90.35</b> |          |
|                                    | Adults and children   | 12.24        | 11.43        | <b>13.01</b> | 11.40        | 9.65         |          |
| <b>Smoking status</b>              |                       |              |              |              |              |              | <0,0001  |
|                                    | Current smoker        | 10.91        | 11.33        | 9.94         | 9.35         | <b>15.59</b> |          |
|                                    | Former smoker         | 31.74        | 34.95        | 34.21        | 35.63        | 32.69        |          |
|                                    | Never smoker          | <b>57.35</b> | 53.72        | 55.85        | 55.02        | 51.73        |          |
| <b>Physical activity level</b>     |                       |              |              |              |              |              | <0,0001  |
|                                    | High                  | 31.73        | 34.19        | 31.12        | <b>35.93</b> | 29.38        |          |
|                                    | Moderate              | 40.97        | 44.91        | 41.20        | 41.62        | 43.90        |          |
|                                    | Low                   | 27.30        | 20.90        | <b>27.68</b> | 22.44        | 26.71        |          |
| <b>mPNNS-GS</b>                    |                       |              |              |              |              |              | <0,0001  |
|                                    | Quartile 1            | 28.28        | 25.09        | 23.90        | 21.63        | <b>32.47</b> |          |
|                                    | Quartile 2            | 25.90        | 22.09        | 26.67        | 20.08        | 30.08        |          |
|                                    | Quartile 3            | 26.86        | 28.44        | 26.96        | 30.87        | 21.86        |          |
|                                    | Quartile 4            | 18.96        | 24.37        | 22.47        | 27.42        | <b>15.59</b> |          |

Mutually adjusted percentages obtained with multinomial regression

## Nutriscore

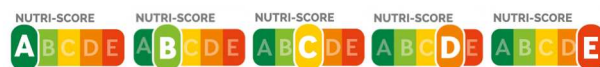

## SENS

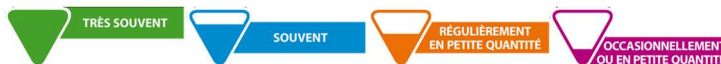

## Modified Reference Intakes

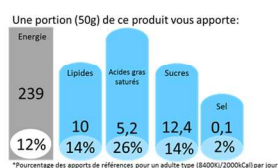

## Multiple Traffic Lights

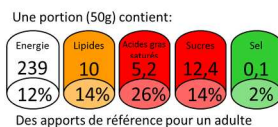

## Formats proposed for a front-of-pack nutrition label in France.

## Caption:

Nutriscore developed by the EREN research team, is based on the British Food Standards Agency nutrient profiling system and presents for each food or beverage the overall nutritional quality on a five-point colour-code scale from Green to Red.

SENS, supported by retailers, is based on a nutrient profiling system developed by a research team, and presents for each food or beverage a recommended frequency of consumption, with a four points colour-coded scale (Green, Blue, Orange, Purple)

Multiple Traffic Lights, supported by industry, and implemented in Great Britain since 2005 presents the numeric values of the contribution of a portion of the food to the intakes in a balanced diet (in grams and percentage of reference intakes, corresponding to the reference intakes label, RI) for energy, fats, saturated fats, sugar and sodium, with a colour-coding (Green, Amber and Red) for each of these components of the food

Modified Reference Intakes (mRIs) present the numeric values of the reference intakes, in both grams and percentage of reference intakes, with bars varying in height depending on the amount of the component in the food.

254x190mm (300 x 300 DPI)

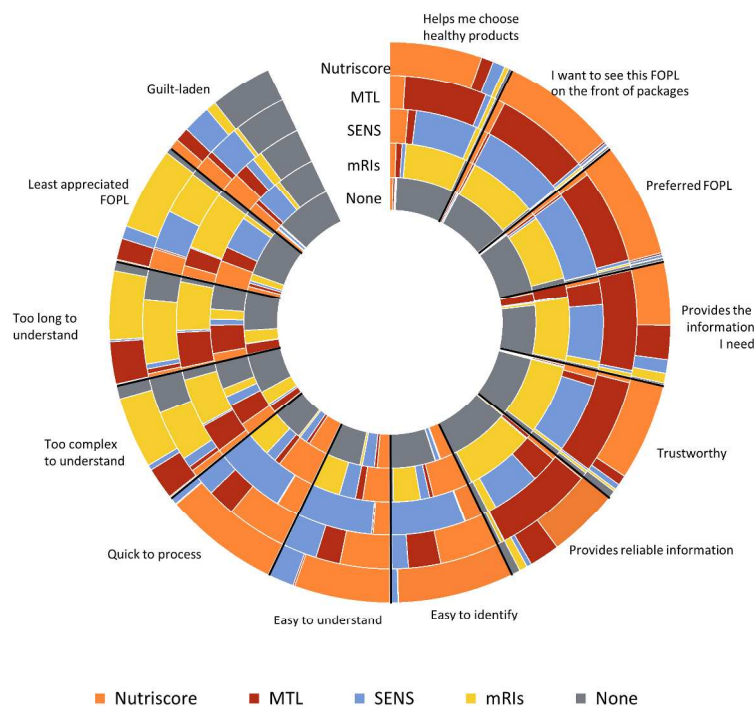

Responses to each of the dimensions of perception in the various clusters  
 Caption: Each circle represents a cluster, each response to a dimension is scaled within the cluster. Positive dimensions are situated on the right hand side of the figure, while negative dimensions are situated on the left hand side of the figure

254x190mm (300 x 300 DPI)

only



Online supplementary material

**Supplemental Table 1 Questionnaire used to assess perception of the various FOP nutrition labels (French version and English translation)**

| Question (English Translation)                         | Question (Original question in French)                      |
|--------------------------------------------------------|-------------------------------------------------------------|
| This FOP label is helpful to choose healthier products | Ce logo aide à choisir des produits meilleurs pour la santé |
| I want to see this FOP label on the front of packages  | Je veux qu'il soit présent sur les emballages               |
| This is my preferred FOP label                         | C'est mon logo préféré                                      |
| This is the FOP label I appreciate the least           | C'est le logo que j'aime le moins                           |
| This FOP label provides me with the information I need | Ce logo m'apporte l'information dont j'ai besoin            |
| This FOP label is trustworthy                          | Ce logo m'inspire confiance                                 |
| This FOP label provides reliable information           | Ce logo permet d'avoir une information fiable               |
| This FOP label is easy to identify                     | Ce logo est facile à repérer                                |
| This label is easy to understand                       | Ce logo est facile à comprendre                             |
| This FOP label is quick to process                     | Ce logo permet d'avoir une information rapide               |
| This FOP label is too complex for understanding        | Ce logo est trop compliqué à comprendre                     |
| This FOP label takes too long to understand            | Ce logo est trop long à comprendre                          |
| This FOP label is guilt-laden                          | Ce logo est culpabilisant                                   |

## Online supplementary material

## Supplemental Table 2 responses to perception questions according clusters of preference for FOP nutrition labeling

## Liking

|                                                        | Nutriscore | MTL   | SENS  | mRIs  | None  |
|--------------------------------------------------------|------------|-------|-------|-------|-------|
| This FOP label is helpful to choose healthier products |            |       |       |       |       |
| Nutriscore                                             | 74.32      | 13.93 | 19.21 | 7.81  | 4.84  |
| SENS                                                   | 9.91       | 5.45  | 65.23 | 4.96  | 1.54  |
| MTL                                                    | 9.78       | 75.12 | 8.65  | 7.54  | 3.2   |
| mRIs                                                   | 3.64       | 3.86  | 5.23  | 76.19 | 1.03  |
| None                                                   | 2.36       | 1.64  | 1.68  | 3.51  | 89.4  |
| I want to see this FOP label on the front of packages  |            |       |       |       |       |
| Nutriscore                                             | 93.45      | 7.64  | 6.32  | 6.89  | 3.1   |
| SENS                                                   | 2.34       | 2.99  | 88.89 | 0.66  | 2.35  |
| MTL                                                    | 1.73       | 86.27 | 2.92  | 2.75  | 2.73  |
| mRIs                                                   | 0.82       | 2.21  | 0.59  | 86.66 | 0.81  |
| None                                                   | 1.66       | 0.89  | 1.28  | 3.04  | 91    |
| This is my preferred FOP label                         |            |       |       |       |       |
| Nutriscore                                             | 93.51      | 6.24  | 6.18  | 5.94  | 3.33  |
| SENS                                                   | 2.3        | 3.12  | 88.31 | 2.9   | 1.05  |
| MTL                                                    | 1.53       | 86.06 | 2.54  | 3.23  | 1.7   |
| mRIs                                                   | 0.33       | 1.84  | 0.42  | 81.23 | 0.47  |
| None                                                   | 2.33       | 2.74  | 2.55  | 6.7   | 93.45 |
| This is the FOP label I appreciate the least           |            |       |       |       |       |
| Nutriscore                                             | 1.08       | 17.92 | 10.9  | 28.78 | 6.79  |
| SENS                                                   | 10.36      | 34.9  | 1.31  | 41.12 | 3.96  |
| MTL                                                    | 16.91      | 1.51  | 19.14 | 18.16 | 5.23  |
| mRIs                                                   | 66.88      | 39.88 | 61.86 | 5.85  | 10.78 |
| None                                                   | 4.77       | 5.78  | 6.78  | 6.09  | 73.24 |

Online supplementary material

**Awareness and trustworthiness**

|                                                               | Nutriscore | MTL   | SENS  | mRIs  | None  |
|---------------------------------------------------------------|------------|-------|-------|-------|-------|
| <b>This FOP label provides me with the information I need</b> |            |       |       |       |       |
| Nutriscore                                                    | 52.36      | 2.01  | 6.25  | 0.56  | 4.21  |
| SENS                                                          | 10.83      | 2.66  | 59.59 | 1.74  | 1.71  |
| MTL                                                           | 27.37      | 91.49 | 25.14 | 16.79 | 14.24 |
| mRIs                                                          | 7.78       | 3.58  | 6.87  | 78.6  | 3.66  |
| None                                                          | 1.67       | 0.25  | 2.16  | 2.31  | 76.17 |
| <b>This FOP label is trustworthy</b>                          |            |       |       |       |       |
| Nutriscore                                                    | 79.33      | 4.82  | 9.29  | 3.48  | 3.67  |
| SENS                                                          | 4.55       | 1.79  | 74.04 | 0.98  | 1.5   |
| MTL                                                           | 7.98       | 87.15 | 8.04  | 1.98  | 1.21  |
| mRIs                                                          | 1.96       | 2.43  | 3.35  | 87.89 | 0.28  |
| None                                                          | 6.18       | 3.81  | 5.29  | 5.67  | 93.34 |
| <b>This FOP label provides reliable information</b>           |            |       |       |       |       |
| Nutriscore                                                    | 57.78      | 2.37  | 5.76  | 1.95  | 0.23  |
| SENS                                                          | 3.92       | 0.48  | 50.74 | 0.88  | 0.12  |
| MTL                                                           | 24.47      | 90.22 | 27.44 | 4.67  | 1.53  |
| mRIs                                                          | 6.54       | 3.18  | 9.22  | 87.05 | 2.36  |
| None                                                          | 7.29       | 3.75  | 6.84  | 5.45  | 95.75 |
| <b>This FOP label is easy to identify</b>                     |            |       |       |       |       |
| Nutriscore                                                    | 93.08      | 53.69 | 19.15 | 45.28 | 20.69 |
| SENS                                                          | 6.03       | 15.02 | 79.02 | 11.56 | 6.82  |
| MTL                                                           | 0.34       | 29.44 | 0.99  | 4.83  | 1.41  |
| mRIs                                                          | 0.08       | 0.6   | 0.32  | 33.66 | 0.78  |
| None                                                          | 0.47       | 1.25  | 0.53  | 4.68  | 70.29 |

For peer review only

## Online supplementary material

**Perceived cognitive workload**

|                                                 | Nutriscore | MTL   | SENS  | mRIs  | None  |
|-------------------------------------------------|------------|-------|-------|-------|-------|
| This label is easy to understand                |            |       |       |       |       |
| Nutriscore                                      | 77.11      | 45.5  | 17.55 | 33.92 | 19.4  |
| SENS                                            | 20.75      | 30.45 | 80.77 | 20.47 | 18.54 |
| MTL                                             | 1.41       | 22.27 | 1.58  | 9.16  | 4.46  |
| mRIs                                            | 0.51       | 1.46  | 0.09  | 35.6  | 3.72  |
| None                                            | 0.22       | 0.33  | 0     | 0.85  | 53.88 |
| This FOP label is quick to process              |            |       |       |       |       |
| Nutriscore                                      | 92.72      | 55.07 | 23.2  | 47.31 | 30.42 |
| SENS                                            | 6.18       | 18.75 | 75.65 | 13.43 | 11.67 |
| MTL                                             | 0.62       | 25.17 | 0.75  | 7.31  | 5.22  |
| mRIs                                            | 0.38       | 0.88  | 0.39  | 31.18 | 2.88  |
| None                                            | 0.1        | 0.12  | 0.01  | 0.78  | 49.82 |
| This FOP label is too complex for understanding |            |       |       |       |       |
| Nutriscore                                      | 0.99       | 6.38  | 6.36  | 14.98 | 2.75  |
| SENS                                            | 4.23       | 9.09  | 1.86  | 12.2  | 3.51  |
| MTL                                             | 25.49      | 4.24  | 30.07 | 27.56 | 11.35 |
| mRIs                                            | 57.73      | 46.53 | 50.78 | 10.9  | 21.55 |
| None                                            | 11.56      | 33.77 | 10.92 | 34.35 | 60.84 |
| This FOP label takes too long to understand     |            |       |       |       |       |
| Nutriscore                                      | 0.77       | 3.45  | 2.37  | 11.12 | 0.65  |
| SENS                                            | 1.57       | 4.47  | 2.19  | 7.43  | 0.81  |
| MTL                                             | 33.71      | 4.33  | 36.95 | 35.12 | 16.19 |
| mRIs                                            | 55.76      | 58.12 | 52.13 | 12.73 | 19.83 |
| None                                            | 8.19       | 29.63 | 6.36  | 33.6  | 62.51 |
| This FOP label is guilt-laden                   |            |       |       |       |       |
| Nutriscore                                      | 8.33       | 14.8  | 21.33 | 12.13 | 4.97  |
| SENS                                            | 22.37      | 27.72 | 9.68  | 28.3  | 4.59  |
| MTL                                             | 11.15      | 5.87  | 14.04 | 5.84  | 1.59  |
| mRIs                                            | 8.23       | 3.73  | 10.16 | 5.93  | 1.73  |
| None                                            | 49.93      | 47.89 | 44.78 | 47.8  | 87.12 |

Online supplementary material

1  
2  
3  
4  
5  
6  
7  
8  
9  
10  
11  
12  
13  
14  
15  
16  
17  
18  
19  
20  
21  
22  
23  
24  
25  
26  
27  
28  
29  
30  
31  
32  
33  
34  
35  
36  
37  
38  
39  
40  
41  
42  
43  
44  
45  
46

For peer review only

STROBE Statement—Checklist of items that should be included in reports of *cross-sectional studies*

|                              | <b>Item No</b> | <b>Recommendation</b>                                                                                                                                                                                                                                                                                                                                                                                                                               |
|------------------------------|----------------|-----------------------------------------------------------------------------------------------------------------------------------------------------------------------------------------------------------------------------------------------------------------------------------------------------------------------------------------------------------------------------------------------------------------------------------------------------|
| <b>Title and abstract</b>    | 1              | (a) Indicate the study's design with a commonly used term in the title or the abstract<br><b>Page 4</b><br>(b) Provide in the abstract an informative and balanced summary of what was done and what was found <b>Page 4</b>                                                                                                                                                                                                                        |
| <b>Introduction</b>          |                |                                                                                                                                                                                                                                                                                                                                                                                                                                                     |
| Background/rationale         | 2              | Explain the scientific background and rationale for the investigation being reported<br><b>Page 6</b>                                                                                                                                                                                                                                                                                                                                               |
| Objectives                   | 3              | State specific objectives, including any prespecified hypotheses <b>Page 7</b>                                                                                                                                                                                                                                                                                                                                                                      |
| <b>Methods</b>               |                |                                                                                                                                                                                                                                                                                                                                                                                                                                                     |
| Study design                 | 4              | Present key elements of study design early in the paper <b>Page 8</b>                                                                                                                                                                                                                                                                                                                                                                               |
| Setting                      | 5              | Describe the setting, locations, and relevant dates, including periods of recruitment, exposure, follow-up, and data collection <b>Page 8</b>                                                                                                                                                                                                                                                                                                       |
| Participants                 | 6              | (a) Give the eligibility criteria, and the sources and methods of selection of participants <b>Page 8-10</b>                                                                                                                                                                                                                                                                                                                                        |
| Variables                    | 7              | Clearly define all outcomes, exposures, predictors, potential confounders, and effect modifiers. Give diagnostic criteria, if applicable <b>Page 8-10</b>                                                                                                                                                                                                                                                                                           |
| Data sources/<br>measurement | 8*             | For each variable of interest, give sources of data and details of methods of assessment (measurement). Describe comparability of assessment methods if there is more than one group <b>Page 8-10</b>                                                                                                                                                                                                                                               |
| Bias                         | 9              | Describe any efforts to address potential sources of bias <b>Page 10</b>                                                                                                                                                                                                                                                                                                                                                                            |
| Study size                   | 10             | Explain how the study size was arrived at <b>Page 11</b>                                                                                                                                                                                                                                                                                                                                                                                            |
| Quantitative variables       | 11             | Explain how quantitative variables were handled in the analyses. If applicable, describe which groupings were chosen and why <b>Page 8-10</b>                                                                                                                                                                                                                                                                                                       |
| Statistical methods          | 12             | (a) Describe all statistical methods, including those used to control for confounding<br><b>Page 10-11</b><br>(b) Describe any methods used to examine subgroups and interactions <b>Not applicable</b><br>(c) Explain how missing data were addressed <b>Page 10</b><br>(d) If applicable, describe analytical methods taking account of sampling strategy<br><b>Not Applicable</b><br>(e) Describe any sensitivity analyses <b>Not Applicable</b> |
| <b>Results</b>               |                |                                                                                                                                                                                                                                                                                                                                                                                                                                                     |
| Participants                 | 13*            | (a) Report numbers of individuals at each stage of study—eg numbers potentially eligible, examined for eligibility, confirmed eligible, included in the study, completing follow-up, and analysed <b>Page 11</b><br>(b) Give reasons for non-participation at each stage <b>Page 11</b><br>(c) Consider use of a flow diagram                                                                                                                       |
| Descriptive data             | 14*            | (a) Give characteristics of study participants (eg demographic, clinical, social) and information on exposures and potential confounders <b>Page 12, Table 1</b><br>(b) Indicate number of participants with missing data for each variable of interest<br><b>Page 11</b>                                                                                                                                                                           |
| Outcome data                 | 15*            | Report numbers of outcome events or summary measures <b>Page 12, Table 2</b>                                                                                                                                                                                                                                                                                                                                                                        |
| Main results                 | 16             | (a) Give unadjusted estimates and, if applicable, confounder-adjusted estimates and their precision (eg, 95% confidence interval). Make clear which confounders were                                                                                                                                                                                                                                                                                |

|                          |    |                                                                                                                                                                                              |
|--------------------------|----|----------------------------------------------------------------------------------------------------------------------------------------------------------------------------------------------|
|                          |    | adjusted for and why they were included <b>Page 12-13, Tables</b>                                                                                                                            |
|                          |    | (b) Report category boundaries when continuous variables were categorized <b>Page 8-10, Tables</b>                                                                                           |
|                          |    | (c) If relevant, consider translating estimates of relative risk into absolute risk for a meaningful time period <b>Not Applicable</b>                                                       |
| Other analyses           | 17 | Report other analyses done—eg analyses of subgroups and interactions, and sensitivity analyses                                                                                               |
| <b>Discussion</b>        |    |                                                                                                                                                                                              |
| Key results              | 18 | Summarise key results with reference to study objectives <b>Page 13</b>                                                                                                                      |
| Limitations              | 19 | Discuss limitations of the study, taking into account sources of potential bias or imprecision. Discuss both direction and magnitude of any potential bias <b>Page 16</b>                    |
| Interpretation           | 20 | Give a cautious overall interpretation of results considering objectives, limitations, multiplicity of analyses, results from similar studies, and other relevant evidence <b>Page 13-16</b> |
| Generalisability         | 21 | Discuss the generalisability (external validity) of the study results <b>Page 16</b>                                                                                                         |
| <b>Other information</b> |    |                                                                                                                                                                                              |
| Funding                  | 22 | Give the source of funding and the role of the funders for the present study and, if applicable, for the original study on which the present article is based <b>Page 3</b>                  |

\*Give information separately for exposed and unexposed groups.

**Note:** An Explanation and Elaboration article discusses each checklist item and gives methodological background and published examples of transparent reporting. The STROBE checklist is best used in conjunction with this article (freely available on the Web sites of PLoS Medicine at <http://www.plosmedicine.org/>, Annals of Internal Medicine at <http://www.annals.org/>, and Epidemiology at <http://www.epidem.com/>). Information on the STROBE Initiative is available at [www.strobe-statement.org](http://www.strobe-statement.org).

# BMJ Open

## Perception of different formats of front-of-pack nutrition labels according to sociodemographic, lifestyle and dietary factors in a French population : cross-sectional study among the NutriNet-Santé cohort participants.

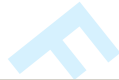

|                                 |                                                                                                                                                                                                                                                                                                                                                                                                                                                                                                                                                                                                                                                                                                                                                                                                                                                                                                                                                                                                                                                                                                                                                                                                                                                                                                                                                                                                                                                                                                                                                                                                                                                                                                                                                                                                                                                                                 |
|---------------------------------|---------------------------------------------------------------------------------------------------------------------------------------------------------------------------------------------------------------------------------------------------------------------------------------------------------------------------------------------------------------------------------------------------------------------------------------------------------------------------------------------------------------------------------------------------------------------------------------------------------------------------------------------------------------------------------------------------------------------------------------------------------------------------------------------------------------------------------------------------------------------------------------------------------------------------------------------------------------------------------------------------------------------------------------------------------------------------------------------------------------------------------------------------------------------------------------------------------------------------------------------------------------------------------------------------------------------------------------------------------------------------------------------------------------------------------------------------------------------------------------------------------------------------------------------------------------------------------------------------------------------------------------------------------------------------------------------------------------------------------------------------------------------------------------------------------------------------------------------------------------------------------|
| Journal:                        | <i>BMJ Open</i>                                                                                                                                                                                                                                                                                                                                                                                                                                                                                                                                                                                                                                                                                                                                                                                                                                                                                                                                                                                                                                                                                                                                                                                                                                                                                                                                                                                                                                                                                                                                                                                                                                                                                                                                                                                                                                                                 |
| Manuscript ID                   | bmjopen-2017-016108.R2                                                                                                                                                                                                                                                                                                                                                                                                                                                                                                                                                                                                                                                                                                                                                                                                                                                                                                                                                                                                                                                                                                                                                                                                                                                                                                                                                                                                                                                                                                                                                                                                                                                                                                                                                                                                                                                          |
| Article Type:                   | Research                                                                                                                                                                                                                                                                                                                                                                                                                                                                                                                                                                                                                                                                                                                                                                                                                                                                                                                                                                                                                                                                                                                                                                                                                                                                                                                                                                                                                                                                                                                                                                                                                                                                                                                                                                                                                                                                        |
| Date Submitted by the Author:   | 11-Apr-2017                                                                                                                                                                                                                                                                                                                                                                                                                                                                                                                                                                                                                                                                                                                                                                                                                                                                                                                                                                                                                                                                                                                                                                                                                                                                                                                                                                                                                                                                                                                                                                                                                                                                                                                                                                                                                                                                     |
| Complete List of Authors:       | <p>Julia, Chantal; Université Paris 13, Equipe de Recherche en Epidémiologie Nutritionnelle, Centre de Recherche en Epidémiologie et Statistiques, Inserm (U1153), Inra (U1125), Cnam, COMUE Sorbonne Paris Cité; Hôpital Avicenne (AP-HP), Public Health Department</p> <p>Péneau, Sandrine; Université Paris 13, Equipe de Recherche en Epidémiologie Nutritionnelle, Centre de Recherche en Epidémiologie et Statistiques, Inserm (U1153), Inra (U1125), Cnam, COMUE Sorbonne Paris Cité,</p> <p>Buscail, Camille; Université Paris 13, Equipe de Recherche en Epidémiologie Nutritionnelle, Centre de Recherche en Epidémiologie et Statistiques, Inserm (U1153), Inra (U1125), Cnam, COMUE Sorbonne Paris Cité; Université Paris 13, Equipe de Recherche en Epidémiologie Nutritionnelle, Centre de Recherche en Epidémiologie et Statistiques, Inserm (U1153), Inra (U1125), Cnam, COMUE Sorbonne Paris Cité</p> <p>Gonzalez, Rebecca; Université Paris 13, Equipe de Recherche en Epidémiologie Nutritionnelle, Centre de Recherche en Epidémiologie et Statistiques, Inserm (U1153), Inra (U1125), Cnam, COMUE Sorbonne Paris Cité</p> <p>Touvier, Mathilde; Université Paris 13, Equipe de Recherche en Epidémiologie Nutritionnelle, Centre de Recherche en Epidémiologie et Statistiques, Inserm (U1153), Inra (U1125), Cnam, COMUE Sorbonne Paris Cité,</p> <p>Hercberg, Serge; Université Paris 13, Equipe de Recherche en Epidémiologie Nutritionnelle, Centre de Recherche en Epidémiologie et Statistiques, Inserm (U1153), Inra (U1125), Cnam, COMUE Sorbonne Paris Cité; Hôpital Avicenne (AP-HP), Public Health Department</p> <p>Kesse-Guyot, Emmanuelle; Université Paris 13, Equipe de Recherche en Epidémiologie Nutritionnelle, Centre de Recherche en Epidémiologie et Statistiques, Inserm (U1153), Inra (U1125), Cnam, COMUE Sorbonne Paris Cité</p> |
| <b>Primary Subject Heading</b>: | Health policy                                                                                                                                                                                                                                                                                                                                                                                                                                                                                                                                                                                                                                                                                                                                                                                                                                                                                                                                                                                                                                                                                                                                                                                                                                                                                                                                                                                                                                                                                                                                                                                                                                                                                                                                                                                                                                                                   |
| Secondary Subject Heading:      | Nutrition and metabolism, Epidemiology, Public health                                                                                                                                                                                                                                                                                                                                                                                                                                                                                                                                                                                                                                                                                                                                                                                                                                                                                                                                                                                                                                                                                                                                                                                                                                                                                                                                                                                                                                                                                                                                                                                                                                                                                                                                                                                                                           |
| Keywords:                       | public health policy, Front-of-pack nutrition labels, Perception                                                                                                                                                                                                                                                                                                                                                                                                                                                                                                                                                                                                                                                                                                                                                                                                                                                                                                                                                                                                                                                                                                                                                                                                                                                                                                                                                                                                                                                                                                                                                                                                                                                                                                                                                                                                                |
|                                 |                                                                                                                                                                                                                                                                                                                                                                                                                                                                                                                                                                                                                                                                                                                                                                                                                                                                                                                                                                                                                                                                                                                                                                                                                                                                                                                                                                                                                                                                                                                                                                                                                                                                                                                                                                                                                                                                                 |



1  
2  
3  
4  
5  
6  
7  
8  
9  
10  
11  
12  
13  
14  
15  
16  
17  
18  
19  
20  
21  
22  
23  
24  
25  
26  
27  
28  
29  
30  
31  
32  
33  
34  
35  
36  
37  
38  
39  
40  
41  
42  
43  
44  
45  
46  
47  
48  
49  
50  
51  
52  
53  
54  
55  
56  
57  
58  
59  
60

SCHOLARONE™  
Manuscripts

For peer review only

1  
2  
3  
4  
5 **Perception of different formats of front-of-pack nutrition labels according**  
6  
7 **to sociodemographic, lifestyle and dietary factors in a French population :**  
8  
9 **cross-sectional study among the NutriNet-Santé cohort participants.**  
10  
11

12 Chantal Julia, senior lecturer<sup>1,2</sup>, Sandrine Péneau, senior lecturer<sup>1</sup>, Camille Buscail, resident<sup>1</sup>, Rebeca  
13 Gonzalez, Post-doc, Mathilde Touvier, research fellow<sup>1</sup>, Serge Hercberg, professor<sup>1,2</sup>, Emmanuelle  
14 Kesse-Guyot, director of research<sup>1</sup>  
15  
16  
17  
18

19 <sup>1</sup> Université Paris 13, Equipe de Recherche en Epidémiologie Nutritionnelle (EREN), Centre  
20 d'Epidémiologie et Biostatistiques Sorbonne Paris Cité (CRESS), Inserm U1153, Inra U1125, Cnam,  
21 COMUE Sorbonne-Paris-Cité, F-93017 Bobigny, France  
22  
23

24 <sup>2</sup> Département de Santé Publique, Hôpital Avicenne (AP-HP), F-93017 Bobigny, France  
25  
26

27 **Corresponding author/reprints requests:**  
28

29 Chantal Julia c.julia@uren.smbh.univ-paris13.fr  
30  
31

32 Université Paris 13, Equipe de Recherche en Epidémiologie Nutritionnelle (EREN), Centre de  
33 Recherche en Epidémiologie et Biostatistiques, Inserm (U1153), Inra(U1125), Cnam, COMUE  
34 Sorbonne Paris Cité, F-93017 Bobigny, France.  
35  
36

37 74 rue Marcel Cachin F-93017 Bobigny Cedex. France.  
38

39 +33 1 48 38 89 53  
40

41 +33 1 48 38 89 31  
42

43 **Last name of authors:** Julia, Péneau, Buscail, Gonzalez, Touvier, Hercberg, Kesse-Guyot  
44  
45

46 **Abstract word count:** 286  
47

48 **Word count (Introduction to Conclusion):** 4385  
49

50 **Number of figures:**2  
51

52 **Number of tables:** 3  
53

54 **Number of coloured figures:** 2  
55

56 **Supplemental material:** 2 tables  
57  
58  
59  
60

**Running title:** FOP label perception

**Keywords:** Front-of-pack nutrition labels; perception;

**Abbreviations:**

5-CNL: Five-colour nutrition label

FOP: Front-of-pack

FSA: Food Standards Agency

FSA-NPS DI : Food Standards Agency Nutrient Profiling System Dietary Index

NPS : Nutrient Profiling System

OfCom: Office of Communication

PNNS: Programme National Nutrition Santé

UK: United Kingdom

**COPYRIGHT DECLARATION**

The Corresponding Author has the right to grant on behalf of all authors and does grant on behalf of all authors, a worldwide licence to the Publishers and its licensees in perpetuity, in all forms, formats and media (whether known now or created in the future), to i) publish, reproduce, distribute, display and store the Contribution, ii) translate the Contribution into other languages, create adaptations, reprints, include within collections and create summaries, extracts and/or, abstracts of the Contribution, iii) create any other derivative work(s) based on the Contribution, iv) to exploit all subsidiary rights in the Contribution, v) the inclusion of electronic links from the Contribution to third party material where-ever it may be located; and, vi) licence any third party to do any or all of the above.

**ETHICS**

The NutriNet-Santé study is conducted in accordance with the Declaration of Helsinki, and all procedures have been approved by the Institutional Review Board of the French Institute for Health and Medical Research (0000388FWA00005831) and the *Commission Nationale de l'Informatique et des Libertés* (908450 and 909216). Electronic informed consent was obtained from all participants.

The Nutrinet-santé study is registered under EudraCT registration number 2013-000929-31.

## TRANSPARENCY DECLARATION

Chantal Julia affirms that the manuscript is an honest, accurate, and transparent account of the study being reported; that no important aspects of the study have been omitted; and that any discrepancies from the study as planned (and, if relevant, registered) have been explained.

## DATA SHARING

All necessary information is available in the paper.

For peer review only

## ABSTRACT

**Objective:** Four formats for a front-of-pack (FOP) nutrition label are currently considered in France: the Nutriscore (or 5-Colour Nutrition Label, developed by a public research team), the SENS (supported by retailers), multiple traffic lights (MTL, currently used in UK) and a modified version of the Reference Intakes (mRIs, supported by industry). Our objective was to investigate the perception of these FOP labels, according to sociodemographic, lifestyle and dietary factors.

**Design:** Cross-sectional study

**Setting:** Web-based French cohort

**Main outcome measure:** FOP labels perception

**Participants:** Participants in the NutriNet-Santé cohort received a specific questionnaire on the perceptions of the four label formats identified. Socio-demographic, lifestyle and dietary data (three 24h dietary records) were collected through self-administered questionnaires. Mutually exclusive clusters of FOP labels perception were identified through a multiple correspondence analysis followed by a hierarchical clustering procedure. Socio-demographic, lifestyle and dietary factors associated with the clusters were explored using multivariable multinomial logistic regression. All analyses were weighted according to 2009 French census data.

**Results:** Among the 21,702 participants in the study, the Nutriscore received the most important number of favourable responses on positive perception dimensions by participants, followed by MTL and SENS. The 5 identified clusters were characterized by marked preferences for Nutriscore (Cluster 1, 43.2% of participants, crude N=9,399), MTL (Cluster 2, 27.3%, crude N=6,163), SENS (Cluster 3, 17.05%, crude N=3,546), mRIs (Cluster 4, 7.31%, crude N=1,632) and none of the presented formats (Cluster 5, 5.10%, crude N=965). The Cluster 1 (Nutriscore) was associated with lower adherence to nutritional recommendations, while Cluster 2 (MTL) was associated with younger age and higher level of education.

1  
2  
3 **Conclusion:** The Nutriscore appears to have a wide reach in the population and to appeal to subjects  
4  
5 with lower adherence to nutritional recommendations.  
6

## 7 8 **ARTICLE SUMMARY**

- 9  
10 • Cross-sectional study in a large population using validated data collection tools.
- 11  
12 • Investigation of multiple dimensions of the perception of FOP labels (awareness, liking,  
13  
14 perceived cognitive workload and trustworthiness), across various formats that are currently  
15  
16 proposed in the French debate on FOP nutrition labelling.
- 17  
18 • Identification of clustered preferences towards each type of format, and investigation of the  
19  
20 association between socio-demographic and dietary factors with FOP label preferences
- 21  
22 • Sample consisting of volunteer subjects included in a cohort study on nutrition, who are therefore  
23  
24 more likely health conscious.
- 25  
26 • Focus on the perception of FOP labels, and not on understanding or use of FOP labels in  
27  
28 purchasing situations.  
29

## 30 31 **SOURCES OF SUPPORT**

32  
33 The NutriNet-Santé Study is supported by the French Ministry of Health, the Institut de Veille  
34  
35 Sanitaire, the Institut National de la Santé et de la Recherche Médicale, the Institut National de la  
36  
37 Recherche Agronomique, the Conservatoire National des Arts et Métiers, the Institut National de  
38  
39 Prévention et d'Éducation pour la Santé and the Fondation pour la Recherche Médicale and Paris 13  
40  
41 University. The funders had no role in study design, data collection and analysis, decision to publish,  
42  
43 or preparation of the manuscript.

44  
45 Study sponsors had no part in study design, collection, analysis, and interpretation of data and the  
46  
47 writing of the article and the decision to submit it for publication. Researchers are independent from  
48  
49 funders and sponsors. All researchers had access to all the data  
50

## 51 52 **CONFLICT OF INTEREST STATEMENT**

53  
54 All authors have completed the Unified Competing Interest form at [www.icmje.org/doi\\_disclosure.pdf](http://www.icmje.org/doi_disclosure.pdf)  
55  
56 (available on request from the corresponding author) and declare that (1) No authors have support  
57  
58  
59  
60

1  
2  
3 from any company for the submitted work; (2) All authors have no relationships with any company  
4 that might have an interest in the submitted work in the previous 3 years; (3) their spouses, partners, or  
5 children have no financial relationships that may be relevant to the submitted work; and (4) All  
6  
7 authors have no non-financial interests that may be relevant to the submitted work.  
8  
9  
10  
11  
12  
13  
14  
15  
16  
17  
18  
19  
20  
21  
22  
23  
24  
25  
26  
27  
28  
29  
30  
31  
32  
33  
34  
35  
36  
37  
38  
39  
40  
41  
42  
43  
44  
45  
46  
47  
48  
49  
50  
51  
52  
53  
54  
55  
56  
57  
58  
59  
60

## INTRODUCTION

Preventing non-communicable diseases has become a top priority for most industrialized countries, as they represent a major part of the burden of diseases (1). In France, cardiovascular diseases and cancers are the first causes of death, contributing each to approximately 30% of overall deaths every year (2). Diet has been recognized as a key modifiable factor which can influence – as preventive or risk factor – a wide range of non-communicable diseases, from cardiovascular disease to cancer, type 2 diabetes, metabolic syndrome or obesity (3-5). Given its potential lever for improvement of the health status of the population, most western countries have invested in state-level public health programs on nutrition, promoting healthy diets and physical activity (6-8). In France, the National Nutrition and Health Program (Programme National Nutrition et Santé, PNNS), launched in 2001 (9), sets a regulatory environment that promotes synergistic actions towards healthy eating and physical activity. The most pervasive actions that have been taken towards the population have consisted in the dissemination of nutrition recommendations in multimedia campaigns and booklets (10;11). Those recommendations act upon the nutrition knowledge of individuals, prompting them to modify their dietary behaviour by promoting consumption of some food groups (e.g. fruits and vegetables, whole-grain cereals, water) or limiting excessive intakes of others (saturated fat, added sugar and sodium) (12). Recently, novel complementary strategies have been put forward in a report to the French Minister of Health in 2014, highlighting the need for specific measures to modify the nutritional environment beyond the actions at the individual level (13). The report stressed in particular measures pertaining to nutrition labelling, in the form of a simplified front-of-pack (FOP) nutrition label, advertising regulation and nutritional taxation (13). Among the proposals of this report, the implementation of a FOP nutrition labelling system was considered as an effective opportunity by the Health Minister, and its principle was introduced in the 2016 French Health Law (14). Many countries have implemented FOP nutrition labels worldwide, either nutrient-specific, such as the ‘Multiple Traffic Light’ system in the UK (15) or summary measures, either simple – such as the Dutch ‘Choices’ logo (16) or the Nordic ‘Green Keyhole’ (17) – or graded – such as the ‘Health Star Rating System’ in New Zealand and Australia (18). Summary systems have been considered as more easily



1  
2  
3 understood and interpreted than nutrient-specific labels, in particular for vulnerable populations  
4  
5 (19;20). Moreover, colour-coded systems are considered more favourably perceived than monochrome  
6  
7 systems (20;21). The initial report to the French Health Minister contained a detailed proposal for a  
8  
9 simple colour-coded and graded label, supported by scientific studies (22-34) and independent  
10  
11 government agencies evaluations (35;36) in the form of the 5-Colour Nutrition Label (5-CNL).  
12  
13 However, alternative proposals were put forward during the debate by industry and retailers, in a vast  
14  
15 lobbying campaign (37). Finally, four alternative formats emerged in the debate: the Nutriscore (an  
16  
17 updated graphical version of the 5-CNL), SENS (a summary, graded and colour-coded label,  
18  
19 developed and promoted by retailers), Multiple Traffic Lights (MTL, nutrient-specific and colour-  
20  
21 coded label, currently used in the United Kingdom, UK) and a modified version of the Reference  
22  
23 Intakes (mRIs, a nutrient-specific and monochrome label promoted by industry) (**Figure 1**). However,  
24  
25 to date, no scientific study has directly compared the perception of the four proposed formats. Some  
26  
27 studies tend to indicate that the 5-CNL would be more favourably perceived than MTL or RIs (25) and  
28  
29 that it may help consumers identifying (24;25) and purchasing healthier foods (26;34) but no data has  
30  
31 been published on the mRIs or the SENS formats.  
32  
33

34  
35 The objective of the present study was therefore to investigate the perception of the four formats that  
36  
37 have been put forward in France in the debate on FOP nutrition labelling, in a comparative design  
38  
39 carried out in the NutriNet-Santé cohort.  
40

## 41 **MATERIAL AND METHODS**

### 42 **Population**

43  
44 Participants were selected from the NutriNet-Santé cohort. Briefly, the NutriNet-santé study is a  
45  
46 prospective cohort study set in France in which inclusion and follow-up of volunteer participants are  
47  
48 entirely performed on the Internet (38). The main objectives of the NutriNet-santé study are: 1) to  
49  
50 investigate the relationship between nutrition and health outcomes; and 2) to investigate the  
51  
52 determinants of dietary patterns and nutritional status. Inclusion in the study began in May, 2009, and  
53  
54 is still ongoing. Volunteer participants aged >18 years-old subscribe to the study, and are included  
55  
56  
57  
58  
59  
60

1  
2  
3 when they have completed a set of questionnaires assessing: diet (through repeated 24h dietary  
4 records), physical activity, anthropometry, lifestyle and socio-economic conditions and health status.  
5 These five types of questionnaires are repeated yearly and have been validated against traditional  
6 assessment methods (paper or interview by dietitians) (39-41). Once the subjects are included in the  
7 cohort, they receive monthly web-questionnaires pertaining to various aspects of dietary behaviour,  
8 physical activity and health, which are optional, and graded according to their relative importance for  
9 research. The participation rate for any optional questionnaires in the NutriNet-Santé study is usually  
10 around 40%. Participants do not receive any form of incentive or compensation to participate in the  
11 online surveys. One of these questionnaires pertained to the perception of the various FOP labelling  
12 systems that have been proposed in the French context and was sent to all participants in the cohort in  
13 June 2016.  
14  
15  
16  
17  
18  
19  
20  
21  
22  
23  
24  
25

26 Detailed information on the NutriNet-Santé study can be found elsewhere (38).  
27  
28

### 29 **Ethics**

30 The NutriNet-Santé study is conducted in accordance with the Declaration of Helsinki, and all  
31 procedures have been approved by the Institutional Review Board of the French Institute for Health  
32 and Medical Research (0000388FWA00005831) and the *Commission Nationale de l'Informatique et*  
33 *des Libertés* (908450 and 909216). Electronic informed consent was obtained from all participants.  
34  
35  
36  
37  
38

39 The NutriNet-Santé study is registered under EudraCT registration number 2013-000929-31.  
40  
41

### 42 **Perception of FOP labels**

43 A specific questionnaire was developed using survey items from previously published research to  
44 investigate participants' perceptions of the four FOP labelling formats that are currently being debated  
45 in France (25;42). The questionnaire also included other dimensions of FOP nutrition labelling  
46 evaluation (objective understanding and legitimacy), which were not used in this study. A brief  
47 presentation of the four FOP labels was provided for the participants at the beginning of the  
48 questionnaire on the perceptions of FOP labels. The presentation made no mention of the origin or  
49  
50  
51  
52  
53  
54  
55  
56  
57  
58  
59  
60

1  
2  
3 support by researchers or industry of each format, in order not to influence the participants based on  
4 this information.  
5

6  
7 Briefly, the Nutriscore, developed by the Nutritional Epidemiology Research Team (Equipe de  
8 Recherche en Epidémiologie Nutritionnelle, authors of this paper, EREN) scientific research team, and  
9 based on the British Food Standards Agency nutrient profiling system and adapted for the French  
10 context by the High Council for Public Health (36) presents for each food or beverage the overall  
11 nutritional quality on a 5-point colour-coded scale from Green to Red (**Figure 1**). SENS, supported by  
12 retailers, is based on a nutrient profiling system developed by a research team, and presents for each  
13 food or beverage a recommended frequency of consumption, with a 4 points colour-coded scale  
14 (Green, Blue, Orange and Purple) (**Figure 1**). MTL, implemented in Great Britain since 2005 presents  
15 the numeric values of the contribution of a portion of the food to the intakes in a balanced diet (in  
16 grams and percentage of reference intakes, corresponding to the reference intakes label) for energy,  
17 fats, saturated fats, sugar and sodium, with a colour-coding (Green, Amber and Red) for each of these  
18 components of the food (**Figure 1**). The Modified Reference Intakes (mRIs) present the numeric  
19 values of the reference intakes, in both grams and percentage of reference intakes, with bars varying in  
20 height depending on the amount of the component in the food (**Figure 1**).  
21  
22  
23  
24  
25  
26  
27  
28  
29  
30  
31  
32  
33  
34  
35  
36

37 Overall, 13 questions were asked on various aspects of liking (e.g. “This is my preferred FOP label”),  
38 trustworthiness (e.g. “This FOP label provides reliable information”), awareness (e.g. “This FOP label  
39 is easy to identify”) and perceived cognitive workload (e.g. “This label is too complex for  
40 understanding”) (see **Supplemental table 1**). For each question, subjects were asked to select among  
41 the four formats the label that best corresponded to them. The participants could also select that ‘none’  
42 of the proposed labels corresponded to his/her perception.  
43  
44  
45  
46  
47  
48  
49

### 50 **Socio-demographic and lifestyle data**

51  
52 Socio-demographic and lifestyle data were collected through self-administered questionnaires and  
53 included age, sex, education (no diploma and up to secondary education, University  $\leq$  2 years,  
54 University  $>$  2 years ), marital status (in couple, single/divorced/widowed), income per household unit  
55  
56  
57  
58  
59  
60

1  
2  
3 (43) (<1200/month, 1200 – 1800, 1800 – 2700,  $\geq$  2700 €/month) and smoking status (current smoker,  
4 former smoker and never smoker). Physical activity was computed using self-declared data from the  
5 validated International Physical Activity Questionnaire (low, moderate and high physical activity  
6 levels) (44). The data collected in the questionnaire closest in time to the questionnaire on the  
7 perceptions of FOP labels were taken into account for the analyses.  
8  
9  
10  
11  
12

### 13 **Dietary data**

14  
15 Dietary data were derived from three repeated 24-hour records randomly distributed in a two-week  
16 period, with two week days and one week-end day. Food consumption was weighted according to the  
17 day of the week of each record. The participants are asked to estimate the portion size for each  
18 reported food and beverage item using validated photographs (45). Nutrient intake was computed  
19 using a published food composition database reflecting foods usually consumed in the French diet  
20 (46). Under-reporters for energy intake were identified using Goldberg/Black's method and were  
21 excluded (47). The dietary data from the 24h dietary record in the NutriNet-Sante study have been  
22 validated against interviewer-led dietary recalls conducted by trained dietitians, and against  
23 biomarkers of nutritional status (40;48;49).  
24  
25  
26  
27  
28  
29  
30  
31  
32  
33  
34

### 35 **Statistical analysis**

36  
37 For the present study, all participants who had completed the questionnaire on the perception of FOP  
38 labels, and having completed information on all covariates were eligible to the present study. Subjects  
39 were excluded if they stated that they never engaged in grocery shopping. The records and  
40 questionnaires closest to the questionnaire on the perceptions of FOP labels were taken into account  
41 for the analyses.  
42  
43  
44  
45  
46  
47

### 48 ***Weighting of the data***

49  
50 All data were weighted using the SAS CALMAR (CALage sur MARGes) macro developed in France  
51 by the Institute of National Statistics (INSEE) to weight survey data to be representative of the French  
52 census population (50). Data used for weighting were sex, age and educational level.  
53  
54  
55  
56  
57  
58  
59  
60

### ***Adherence to dietary recommendations***

Adherence to French dietary recommendations was assessed using a modified version of the PNNS guidelines score (namely, the “*Programme National Nutrition Santé*”-guideline score, PNNS-GS), taking into account only dietary recommendations. The PNNS-GS development, including food groupings, serving sizes, scoring, cut-off and penalties, has been previously described in detail (51). Briefly, this 15-point score is based on French national guidelines and includes 13 components. The eight components referring to food serving recommendations and four components referring to moderation in consumption were included in the modified version of the PNNS-GS (mPNNS-GS) (52). The last component focusing on adherence to physical activity recommendations was not taken into account.

A penalty for overconsumption was assigned to individuals with energy intakes higher than estimated energy expenditure (51). Age and self-reported weight and height at inclusion were used to estimate Schofield’s basal metabolic rate (BMR) (53). Energy expenditures were estimated using BMR and physical activity level. In case of energy intake greater than 5% over the estimated energy expenditure, an identical part was subtracted from the score. Quartiles of mPNNS-GS were computed and used throughout the analyses.

### ***Dietary clusters identification***

The responses from the 13 “perception” questions were used in a multiple correspondence analysis, which yielded 4 dimensions of FOP labelling perception. The dimensions were selected based on their adjusted inertia (respectively 33.6%, 23.0%, 18.4% and 17.2% for a total of 92.3%). The selected dimensions were used as input variables in a two-ways clustering procedure based on hierarchical and K-means methods (SAS CLUSTER and FASCLUST procedures). The plot of semi-partial  $R^2$ , the semi-partial  $T^2$  and the Cubic Clustering Criterion (CCC) by the number of clusters were used to identify the optimal number of clusters.

### *Statistical analysis*

All analyses were weighted according to the CALMAR macro, except the clustering procedure for which no weighting option is available. The responses to each of the 13 questions were mapped across clusters, in order to identify the FOP perception characteristics of each cluster. Socio-demographic, lifestyle and dietary variables were mutually adjusted against clusters in a multivariable multinomial regression. Adjusted-percentages for each socio-demographic, lifestyle and dietary characteristic were extracted from this procedure across clusters.

All tests were two-sided and a P value <0.01 was considered significant, given the high number of statistical tests performed and the large sample size. Statistical analyses were performed using SAS Software (version 9.3, SAS Institute Inc, Cary, NC, USA).

## **RESULTS**

Overall, 38,604 subjects completed the questionnaire on the perceptions of FOP labels. Among these, 714 (1.85%) were excluded because they never engaged in grocery shopping. Among the 37,890 remaining subjects, 16,188 (42.72%) were excluded for incomplete data on covariates (the vast majority of which (N=13,066, 80.71% of excluded subjects) for incomplete data on mPNNS-GS computation, which requires the presence of three 24h records, frequency questionnaire on alcohol consumption and frequency of seafood consumption, leading to an overall sample of 21,702 participants for analysis (e.g. 56.22%).

Characteristics of the crude and weighted sample are presented in **Table 1**. The crude sample exhibited a higher percentage of females (73.42%), older subjects (68.36% were  $\geq$  50 years-old), educated (37.54% had above 2 years of university training) and with high incomes (38.49% had incomes >2700€/month).

Overall, the Nutriscore was the label receiving the most important number of favourable responses on positive perception dimensions by participants, followed by MTL and SENS (43.79% of participants considered the Nutriscore as their preferred FOP label, followed by 24.92% for MTL and 17.17% for SENS) (**Table 2**). Conversely, RIs yielded the highest number of responses on negative dimensions of

1  
2  
3 perception (complexity and time processing). A majority of participants considered that none of the  
4  
5 proposed labels were guilt-laden (50.23%), followed by SENS (21.19%)  
6

7  
8 The clustering procedure resulted in the identification of 5 mutually exclusive groups of subjects  
9  
10 according to their perception of FOP nutrition labels. Clusters represented 43.23% (crude N=9,399),  
11  
12 27.31% (crude N=6,163), 17.05% (crude N=3,546), 7.31% (crude N=1,632) and 5.10% (crude N=965)  
13  
14 of participants, respectively. The mapping of perception responses across clusters showed that each  
15  
16 cluster was characterized by a marked preference for one of the proposed FOP nutrition label formats:  
17  
18 Cluster 1 displayed a marked preference for the Nutriscore, Cluster 2 for the MTL, Cluster 3 for the  
19  
20 SENS, Cluster 4 for the RIs and Cluster 5 for none of the presented labels (**Figure 2; see**  
21  
22 **Supplemental Table 2 for detail**). Therefore, clusters were termed according to their label  
23  
24 preference. These preferences across cluster were particularly prominent for the following aspects:  
25  
26 label wanted on the front of the packages (>85% for each specific FOP label in their respective  
27  
28 cluster), preferred label (>80% for each specific label in their respective cluster), label allowing to  
29  
30 choose healthier products (>65% for each specific label in their respective cluster), trustworthiness  
31  
32 (>74% for each specific label in their respective cluster) (**Figure 2; see Supplemental Table 2 for**  
33  
34 **detail**). However, for some dimensions of perception, responses were somewhat less marked for each  
35  
36 specific FOP label, and more concurrent across clusters. For example, >23% of participants in all  
37  
38 clusters considered that the Nutriscore was quick to process, >19% considered it easy to identify, and  
39  
40 >17% considered it easy to understand (**Figure 2; see Supplemental Table 2 for detail**). Conversely,  
41  
42 >20% of participants in all clusters considered the mRIs to be too complex for understanding (except  
43  
44 in its own where it obtained 10.90% of opinions), >19% considered it too long to understand (except  
45  
46 in its own cluster, with 12.73% of opinions), and was considered as the least appreciated FOP nutrition  
47  
48 label for 66.88% of subjects in the Cluster Nutriscore, 61.86% of subjects in the Cluster SENS,  
49  
50 39.88% of subjects in the Cluster MTL and 10.78% of subjects in the Cluster None (**Figure 2; see**  
51  
52 **Supplemental Table 2 for detail**). Finally, participants considered that none of the presented labels  
53  
54 was guilt-laden: 87.12% of Cluster None, 49.93% of Cluster Nutriscore, 47.89% of Cluster MTL,  
55  
56  
57  
58  
59  
60



1  
2  
3 47.80% of Cluster mRIs and 44.78% of Cluster SENS (**Figure 2**; see **Supplemental Table 2** for  
4  
5 **detail**).

6  
7  
8 Multivariable adjusted socio-demographic characteristics according to specific clusters are shown in  
9  
10 **Table 3**. Less educated subjects were more frequent in Cluster None and Cluster mRIs and highly  
11  
12 educated subjects in Cluster MTL (**Table 2**). Smokers were more likely in Cluster None, while never  
13  
14 smokers were more likely in Cluster Nutriscore. Subjects with low physical activity were more likely  
15  
16 in Cluster SENS and Cluster Nutriscore (**Table 2**). Finally, subjects with lower adherence to dietary  
17  
18 recommendations (Quartile 1 of mPNNS-GS) were more likely in Cluster None and Cluster  
19  
20 Nutriscore while subjects with high adherence to dietary recommendations (Quartile 4 of mPNNS-GS)  
21  
22 were more likely in Cluster mRIs and Cluster MTL (**Table 2**).

## 23 24 25 **DISCUSSION**

26  
27 Our study showed that the perception of FOP labels can be clustered according to consistent  
28  
29 preferences for specific formats. Among the proposed labels in the current French debate, the  
30  
31 Nutriscore appeared to be the most preferred format, followed by MTL. Moreover, though each cluster  
32  
33 presented marked preferences for one type of format or another, the Nutriscore appeared to reach to  
34  
35 participants beyond its specific cluster, as it was considered easy to identify and understand by a  
36  
37 significant number of participants in other clusters. Finally, socio-demographic characteristics  
38  
39 appeared to be associated with each cluster, with a specific cluster (Cluster 5, None), concentrating  
40  
41 high percentages of subjects presenting disadvantaged socio-demographic characteristics (lower levels  
42  
43 of education) and lifestyle risks (smoking, low level of physical activity and low adherence to dietary  
44  
45 recommendations).

46  
47  
48 Compared to a previous study conducted in early 2015 using a similar methodology and among  
49  
50 participants in the same cohort study, the results of the present analyses show that the reach of the  
51  
52 Nutriscore has somewhat broadened since then (25). The Nutriscore appeared to have a wide reach in  
53  
54 the population, and to appeal to subjects with lower adherence to dietary recommendations. This result  
55  
56 shows that the Nutriscore may be an effective complementary strategy to current public health  
57  
58  
59  
60



1  
2  
3 nutrition policies, which promote healthy eating through widely disseminated nutritional  
4 recommendations (54). Though this strategy has led to an increase in the knowledge of nutritional  
5 recommendations, consumers somehow struggle to translate such advice into action (55;56).  
6  
7

8  
9 Disseminated nutrition information is suggested to appeal more to those already having the capacity to  
10 implement nutritional knowledge (through higher education or income), and may lead to an increase in  
11 social disparities in health (57;58). Therefore, the fact that the Nutriscore appears to appeal to subjects  
12 with low adherence to nutrition recommendations may be a key element to help translating nutritional  
13 recommendations into practice, in particular for those with low nutritional knowledge.  
14  
15  
16  
17  
18

19  
20 The MTL appeared as the second preferred FOP label in the population, particularly in younger  
21 subjects, with university education and lower incomes. Moreover it was considered to be providing  
22 reliable and useful information beyond its own cluster. The fact that direct numeric information on  
23 nutrient content (such as the information provided by mRIs) received a much lower support in the  
24 population shows that the appeal of the MTL is very probably associated with the colour feature of  
25 this FOP label (59), as multiple numeric information are typically considered difficult to understand  
26 (60). Indeed, compared to mRIs, the MTL only adds an interpretation of the level of nutrients using a  
27 colour-coding. However, the interpretation of the colour-coding has appeared to be challenging in  
28 certain populations (59). Indeed, MTL is a nutrient-specific FOP label, giving individual information  
29 for energy and four nutrients (sugars, fat, saturated fat and salt). Multiple nutrient-related information  
30 implies first that consumers are able to identify the nutrients that are referred to, and second, that they  
31 are able to prioritize the information provided for each nutrient (42;61). Indeed, MTL can lead to  
32 conflicting choice options: for example, the comparison between two products, with the same number  
33 of nutrients coded in 'red', but not for the same nutrients (e.g. one with a 'red' code for sugar and the  
34 other for saturated fatty acids) implies for the consumer to be able to single out one of the nutrients in  
35 order to make a choice (21). These characteristics of the label may in part explain the fact that the  
36 MTL appeared to appeal more particularly to young, educated subjects with a high level of adherence  
37 to nutritional recommendations. This more favourable perception among these participants may stem  
38 from their higher nutritional knowledge, which allows them to better interpret the label and act upon it  
39  
40  
41  
42  
43  
44  
45  
46  
47  
48  
49  
50  
51  
52  
53  
54  
55  
56  
57  
58  
59  
60

1  
2  
3 in purchasing situations (21;60). However, this specific reach in terms of population might also lead to  
4  
5 widen inequalities in health and nutrition if implemented in the overall population (62).  
6

7  
8 The SENS system was the preferred system for 17% of the population, more particularly in  
9  
10 households with children. The graphical system the SENS originated from was developed by a  
11  
12 marketing team from a retailer in September 2014, and received later support from the French  
13  
14 retailers' federation (37). As for Nutriscore or MTL, it is based on colour coding (though not based on  
15  
16 the polychromatic Green-Red scale), with the addition of recommended frequencies of consumption  
17  
18 for each level of the label. This latter feature may in part explain the higher appeal of the SENS system  
19  
20 on participants with children, as it gives a more specific guidance for consumption, which can be used  
21  
22 for children. However, these specific consumption frequencies for each level of the label could also be  
23  
24 interpreted as an oversimplification and a form of paternalism for many consumers (63). This may be  
25  
26 one of the reasons the SENS label was considered as a guilt-laden label for 21.2% of the population.  
27

28  
29 Moreover, though Nutriscore and MTL rely on the well-known polychromatic scale from green to red  
30  
31 (corresponding to recognized signals), which are easier to interpret, the SENS colour-coding does not  
32  
33 refer directly to any known colour scale (its levels are Green-Blue-Orange-Purple). Colours are  
34  
35 considered helpful to generally increase the salience of a FOP label, however, studies that have shown  
36  
37 a specific advantage of colour-coding have used readily interpretative colour-coding (63-66). In the  
38  
39 study by Bialkova et al., which used polychromatic RIs, but with no readily-interpretative colours  
40  
41 (yellow, orange, purple, blue), the polychromatic RIs indeed had lower performance than  
42  
43 monochromatic RIs (64). Therefore, beyond preference only, the use of highly interpretable colours  
44  
45 (e.g. 'Green' and 'Red') in a FOP labelling system might be an important feature of a colour coding.  
46

47  
48 Finally, our study shows that a portion of the population appeared to disregard or even reject FOP  
49  
50 nutrition labels entirely. Indeed, participants in Cluster 5 (None, corresponding to 5.1% of the  
51  
52 population) consistently responded 'None' for all dimensions of perception that were investigated.  
53

54  
55 Moreover, the socio-demographic characteristics of this specific population suggested that they may in  
56  
57 fact be more vulnerable and more at nutritional risk than the rest of the population. Indeed, this cluster  
58  
59  
60

1  
2  
3 included more specifically older participants, subjects with lower educational levels, current smokers  
4 and subjects with lower adherence to nutritional recommendations. This result is in line with a study in  
5 Australia showing that males and subjects with lower socio-economic status were more likely to report  
6 no preference for a FOP label (67). These results also pose a challenge to the design of efficient public  
7 health policies, as some of the subjects who would certainly benefit from them appear to reject them.  
8 Novel and targeted interventions in public health nutrition should therefore be devised to appeal to this  
9 vulnerable population to entice them towards healthier diets, taking into account the broader  
10 environment related to risk behaviours (68). Alternatively, policies targeting the environment, and not  
11 depending on individual choices, such as the reformulation of existing products, may have an indirect  
12 impact on these populations (69).

13  
14  
15  
16  
17  
18  
19  
20  
21  
22  
23  
24 Strengths of our study include its large sample size for an online survey, based on an ongoing dynamic  
25 cohort study performed exclusively online. Moreover, the data used for the investigation of dietary  
26 intakes used validated data collection tools, using repeated dietary records (40). We were also able to  
27 investigate multiple dimensions of the perception of FOP labels (awareness, liking, perceived  
28 cognitive workload and trustworthiness), across various formats that are currently proposed in the  
29 French debate on FOP nutrition labelling. Finally, we were able to identify clustered preferences  
30 towards each type of format, and relate them to socio-demographic and dietary factors, which highly  
31 contributed to the interpretation of such preferences in a public health perspective.

32  
33  
34  
35  
36  
37  
38  
39  
40  
41 Our study is subject to some limitations. First, our sample consists of volunteer subjects included in a  
42 cohort study on nutrition, who are therefore more likely health conscious. The completion of the  
43 questionnaire was optional, and the participation rate was therefore not optimal, which could have also  
44 added to a selection bias in our study population. However, our data shows a wide variety of dietary  
45 profiles, somewhat lessening the importance of this bias. Moreover, the use of weighting partially  
46 controlled for the selection bias of our study population (70). Second, our study focused on the  
47 perception of FOP labels, and not on understanding or use of FOP labels in purchasing situations.  
48 However, following the theoretical framework for the use of FOP nutrition labels, favourable  
49 perception is a crucial pre-requisite for the efficiency of a given label (71;72). Third, the participants  
50  
51  
52  
53  
54  
55  
56  
57  
58  
59  
60

1  
2  
3 in the NutriNet-Santé study had already been involved in a previous survey on the perception of  
4 various FOP nutrition labels (25). However, the formats presented in the two versions of the  
5 questionnaire were somewhat different, and the delay between the two questionnaires of more than a  
6 year, therefore limiting the familiarity of the participants with the FOP nutrition labels formats  
7 displayed in this study. However, the participants were aware of FOP nutrition labelling, which could  
8 have affected their responses. Finally, the questionnaire for the online survey and the measures that  
9 were used in this study were not formally validated but based on scientific literature. They derived  
10 from previously published work which took into account the literature on the perception of FOP  
11 nutrition labelling (42;61;73).

21  
22 To conclude, FOP nutrition labels could be useful strategies to tackle social inequalities in nutrition  
23 and health, provided that the graphical format that is selected has a wide reach in the population. This  
24 is all the more important that subjects who are more concerned about their diet (and more likely to  
25 have a healthier diet), are also more likely to use a nutrition label when grocery shopping (20). As  
26 such, the Nutriscore, which has a favourable perception among subjects with low adherence to  
27 nutritional recommendations, may be a helpful strategy to lead them towards healthier diets.  
28  
29  
30  
31  
32  
33  
34  
35  
36  
37  
38  
39  
40  
41  
42  
43  
44  
45  
46  
47  
48  
49  
50  
51  
52  
53  
54  
55  
56  
57  
58  
59  
60

## AKNOWLEDGEMENTS

The authors especially thank Nathalie Arnault for data management, data cleaning and statistical analyses.

We especially thank Younes Esseddik, Paul Flanzky and Thi Hong Van Duong, computer scientists; Veronique Gourlet, Fabien Szabo, Nathalie Arnault, Laurent Bourhis and Stephen Besseau, statisticians; and Cédric Agaësse, Claudia Chahine, dieticians.

We warmly thank all of the dedicated and conscientious volunteers involved in the Nutrinet-Santé cohort.

## AUTHORSHIP CONTRIBUTION

CJ wrote the statistical analysis plan, analysed the data, and drafted and revised the paper. She is the guarantor. EKG participated in statistical analysis plan, analysed the data and critically revised the paper for important intellectual content. MT CB SP RG analysed the data and critically revised the paper for important intellectual content. SH designed data collection tools, implemented the study, monitored data collection for the whole study, and critically revised the draft paper for important intellectual content. All authors, external and internal, had full access to all of the data (including statistical reports and tables) in the study and can take responsibility for the integrity of the data and the accuracy of the data analysis. All authors have read and approved the final manuscript.

## Reference List

1. World Health Organization. Global Health Risks: Mortality and burden of disease attributable to selected major risks. 2009. Geneva, WHO.
2. DREES. L'état de santé de la population en France- Suivi des objectifs annexés à la loi de santé publique. Rapport 2011. Danet, S. 2011. Paris, Direction des études de l'évaluation et des statistiques (DRESS) - Collection Etudes et Statistiques.
3. World Health Organization. Obesity: Preventing and managing the global epidemic. Report of a WHO consultation. WHO Technical Report Series 894. 2000. Geneva, WHO.
4. World Health Organization. Diet, Nutrition and the prevention of chronic diseases. Report of a joint WHO/FAO expert consultation. WHO Technical Report Series N°916. 2003. Geneva, WHO.
5. World Health Organization. Global strategy on diet, physical activity and health. 2004. Geneva, WHO.
6. Hughes R. Competencies for effective public health nutrition practice: a developing consensus. *Public Health Nutr* 2004;7:683-91.
7. Serra-Majem L. Moving forward in public health nutrition - the I World Congress of Public Health Nutrition - Introduction. *Nutrition Reviews* 2009;67:S2-S6.
8. Lachat C, Van Camp J, De Henauw S et al. A concise overview of national nutrition action plans in the European Union Member States. *Public Health Nutr* 2005;8:266-74.
9. Hercberg S, Chat-Yung S, Chauliac M. The French National Nutrition and Health Program: 2001-2006-2010. *International Journal of Public Health* 2008;53:68-77.
10. Institut National de Prévention et d'Education pour la Santé. La santé vient en mangeant. Le guide alimentaire pour tous. Paris: INPES, 2002.
11. Institut National de Prévention et d'Education pour la Santé. La santé vient en mangeant et en bougeant. Le guide nutrition des enfants et ados pour tous les parents. Paris: INPES, 2004.
12. Azais-Braesco V, Goffi C, Labouze E. Nutrient profiling: comparison and critical analysis of existing systems. *Public Health Nutr* 2006;9:613-22.
13. Hercberg, S. Propositions pour un nouvel élan de la politique nutritionnelle française de santé publique dans le cadre de la stratégie nationale de santé. 1ère partie : mesures concernant la prévention nutritionnelle. 2013. Paris. 28-5-2014.
14. Journal Officiel de la République Française. JORF n°0022 du 27 janvier 2016. texte n° 1. LOI n° 2016-41 du 26 janvier 2016 de modernisation de notre système de santé. 27-1-2016. Paris, JORF.
15. Food Standards Agency. Signposting and traffic light labeling. 2010. London, FSA. 10-2-2015.

16. Choices International Foundation. Product Criteria v2.2. 2011. 18-6-2014.
17. Asp NG, Bryngelsson S. Health claims in the labelling and marketing of food products: the Swedish food sector's Code of Practice in a European perspective. *Food & Nutrition Research*; Vol 51, No 3 (2007) 2007.
18. Commonwealth of Australia. Health Star Rating System. A joint Australian, state and territory governments initiatives in partnership with industry, public health and consumer groups. 2015. Commonwealth of Australia. 22-4-2015.
19. Feunekes GI, Gortemaker IA, Willems AA, Lion R, Van den Kommer M. Front-of-pack nutrition labelling: Testing effectiveness of different nutrition labelling formats front-of-pack in four European countries. *Appetite* 2008;50:57-70.
20. Van Kleef E, Dagevos H. The Growing Role of Front-of-Pack Nutrition Profile Labeling: A Consumer Perspective on Key Issues and Controversies. *Crit Rev Food Sci Nutr* 2015;55:291-303.
21. Cowburn G, Stockley L. Consumer understanding and use of nutrition labelling: a systematic review. *Public Health Nutrition* 2005;8:21-8.
22. Adriouch S, Julia C, Kesse-Guyot E et al. Prospective association between a dietary quality index based on a nutrient profiling system and cardiovascular disease risk. *European Journal of Preventive Cardiology* 2016;23:1669-76.
23. Donnenfeld M, Julia C, Kesse-Guyot E et al. Prospective association between cancer risk and an individual dietary index based on the British Food Standards Agency Nutrient Profiling System. *Br J Nutr* 2015;114:1702-10.
24. Ducrot P, Mejean C, Julia C et al. Objective Understanding of Front-of-Package Nutrition Labels among Nutritionally At-Risk Individuals. *Nutrients* 2015;7:7106-25.
25. Ducrot P, Mejean C, Julia C et al. Effectiveness of Front-Of-Pack Nutrition Labels in French Adults: Results from the NutriNet-Sante Cohort Study. *Plos One* 2015;10:e0140898.
26. Ducrot P, Julia C, Mejean C et al. Impact of Different Front-of-Pack Nutrition Labels on Consumer Purchasing Intentions A Randomized Controlled Trial. *Am J Prev Med* 2016;50:627-36.
27. Julia C, Touvier M, Mejean C et al. Development and validation of an individual dietary index based on the British Food Standard Agency nutrient profiling system in a French context. *J Nutr* 2014;144:2009-17.
28. Julia C, Ducrot P, Peneau S et al. Discriminating nutritional quality of foods using the 5-Color nutrition label in the French food market: consistency with nutritional recommendations. *Nutr J* 2015;14:100.
29. Julia C, Ducrot P, Lassale C et al. Prospective associations between a dietary index based on the British Food Standard Agency nutrient profiling system and 13-year weight gain in the SU.VI.MAX cohort. *Prev Med* 2015;81:189-94.



- 1  
2  
3 30. Julia C, Kesse-Guyot E, Ducrot P et al. Performance of a five category front-of-pack  
4 labelling system - the 5-colour nutrition label - to differentiate nutritional quality of breakfast cereals  
5 in France. *BMC Public Health* 2015;15:179.  
6
- 7 31. Julia C, Fezeu LK, Ducrot P et al. The Nutrient Profile of Foods Consumed Using the  
8 British Food Standards Agency Nutrient Profiling System Is Associated with Metabolic Syndrome in  
9 the SU.VI.MAX Cohort. *J Nutr* 2015;145:2355-61.  
10
- 11 32. Julia C, Mejean C, Touvier M et al. Validation of the FSA nutrient profiling system  
12 dietary index in French adults-findings from SUVIMAX study. *Eur J Nutr* 2016;55:1901-10.  
13
- 14 33. Julia C, Kesse-Guyot E, Touvier M, Mejean C, Fezeu L, Hercberg S. Application of  
15 the British Food Standards Agency nutrient profiling system in a French food composition database.  
16 *The British journal of nutrition* 2014;112:1699-705.  
17
- 18 34. Julia C, Blanchet O, Méjean C et al. Impact of the front-of-pack 5-colour nutrition  
19 label (5-CNL) on the nutritional quality of purchases: an experimental study. *International Journal of*  
20 *Behavioral Nutrition and Physical Activity* 2016;13:1-9.  
21
- 22 35. ANSES. Evaluation de la faisabilité du calcul d'un score nutritionnel tel qu'élaboré par  
23 Rayner et al. Rapport d'appui scientifique et technique. 2015. Maison Alfort, ANSES. 9-11-2015.  
24
- 25 36. Haut Conseil de la Santé Publique. Avis relatif à l'information sur la qualité  
26 nutritionnelle des produits alimentaires. 2015. Paris, HCSP. 9-11-2015.  
27
- 28 37. Julia C, Hercberg S. Research and lobbying conflicting on the issue of a front-of-pack  
29 nutrition labelling in France. *Archives of Public Health* 2016;74:51.  
30
- 31 38. Hercberg S, Castetbon K, Czernichow S et al. The Nutrinet-Sante Study: a web-based  
32 prospective study on the relationship between nutrition and health and determinants of dietary patterns  
33 and nutritional status. *Bmc Public Health* 2010;10.  
34
- 35 39. Touvier M, Mejean C, Kesse-Guyot E et al. Comparison between web-based and  
36 paper versions of a self-administered anthropometric questionnaire. *Eur J Epidemiol* 2010;25:287-96.  
37
- 38 40. Touvier M, Kesse-Guyot E, Mejean C et al. Comparison between an interactive web-  
39 based self-administered 24 h dietary record and an interview by a dietitian for large-scale  
40 epidemiological studies. *Br J Nutr* 2011;105:1055-64.  
41
- 42 41. Vergnaud AC, Touvier M, Mejean C et al. Agreement between web-based and paper  
43 versions of a socio-demographic questionnaire in the NutriNet-Sante study. *Int J Public Health*  
44 2011;56:407-17.  
45
- 46 42. Mejean C, Macouillard P, Peneau S, Hercberg S, Castetbon K. Consumer acceptability  
47 and understanding of front-of-pack nutrition labels. *Journal of Human Nutrition and Dietetics*  
48 2013;26:494-503.  
49
- 50 43. INSEE (Institut National de la Statistique et des Etudes Economiques). Méthodes.  
51 2014. 17-3-2014.  
52
- 53 44. Craig CL, Marshall AL, Sjostrom M et al. International physical activity  
54 questionnaire: 12-country reliability and validity. *Med Sci Sports Exerc* 2003;35:1381-95.  
55  
56  
57  
58  
59  
60



- 1  
2  
3 45. Hercberg S, Deheeger M, Preziosi P. SU.VI.MAX Portions alimentaires. Manuel  
4 photos pour l'estimation des quantités. Paris: Editions polytechnica, 2002.  
5  
6 46. Etude Nutrinet-Santé. Table de composition des aliments de l'étude Nutrinet-Santé.  
7 Paris: Economica, 2013.  
8  
9 47. Black AE. Critical evaluation of energy intake using the Goldberg cut-off for energy  
10 intake: basal metabolic rate. A practical guide to its calculation, use and limitations. *Int J Obes Relat*  
11 *Metab Disord* 2000;24:1119-30.  
12  
13 48. Lassale C, Galan P, Julia C, Fezeu L, Hercberg S, Kesse-Guyot E. Association  
14 between adherence to nutritional guidelines, the metabolic syndrome and adiposity markers in a  
15 French adult general population. *Plos One* 2013;8:e76349.  
16  
17 49. Lassale C, Peneau S, Touvier M et al. Validity of web-based self-reported weight and  
18 height: results of the Nutrinet-Sante study. *J Med Internet Res* 2013;15:e152.  
19  
20 50. INSEE (Institut National de la Statistique et des Etudes Economiques). La macro SAS  
21 CALMAR. 2016. 19-12-2016.  
22  
23 51. Estaquio C, Kesse-Guyot E, Deschamps V et al. Adherence to the French Programme  
24 National Nutrition Sante Guideline Score Is Associated with Better Nutrient Intake and Nutritional  
25 Status. *J Am Diet Assoc* 2009;109:1031-41.  
26  
27 52. Assmann KE, Lassale C, Galan P, Hercberg S, Kesse-Guyot E. Dietary Quality and 6-  
28 Year Anthropometric Changes in a Sample of French Middle-Aged Overweight and Obese Adults.  
29 *Plos One* 2014;9.  
30  
31 53. Schofield WN. Predicting basal metabolic rate, new standards and review of previous  
32 work. *Hum Nutr Clin Nutr* 1985;39 Suppl 1:5-41.  
33  
34 54. Hercberg S, Chat-Yung S, Chauliac M. The French National Nutrition and Health  
35 Program: 2001-2006-2010. *Int J Public Health* 2008;53:68-77.  
36  
37 55. Escalon H, Beck F, Bossard C. Associations entre la connaissance des  
38 recommandations du Programme national nutrition santé et les comportements en matière  
39 d'alimentation et d'activité physique. *Revue d'épidémiologie et de Santé Publique* 2013;61:37-47.  
40  
41 56. Worsley A. Nutrition knowledge and food consumption: can nutrition knowledge  
42 change food behaviour? *Asia Pacific Journal of Clinical Nutrition* 2002;11:S579-S585.  
43  
44 57. Backholer K, Beauchamp A, Ball K et al. A Framework for Evaluating the Impact of  
45 Obesity Prevention Strategies on Socioeconomic Inequalities in Weight. *Am J Public Health*  
46 2014;104:E43-E50.  
47  
48 58. Beauchamp A, Backholer K, Magliano D, Peeters A. The effect of obesity prevention  
49 interventions according to socioeconomic position: a systematic review. *Obesity Reviews*  
50 2014;15:541-54.  
51  
52 59. Hawley KL, Roberto CA, Bragg MA, Liu PJ, Schwartz MB, Brownell KD. The  
53 science on front-of-package food labels. *Public Health Nutrition* 2013;16:430-9.  
54  
55  
56  
57  
58  
59  
60

- 1  
2  
3 60. Campos S, Doxey J, Hammond D. Nutrition labels on pre-packaged foods: a  
4 systematic review. *Public Health Nutrition* 2011;14:1496-506.  
5
- 6 61. Mejean C, Macouillard P, Peneau S, Hercberg S, Castetbon K. Perception of front-of-  
7 pack labels according to social characteristics, nutritional knowledge and food purchasing habits.  
8 *Public Health Nutrition* 2013;16:392-402.  
9
- 10 62. Frohlich KL, Potvin L. Transcending the known in public health practice: the  
11 inequality paradox: the population approach and vulnerable populations. *Am J Public Health*  
12 2008;98:216-21.  
13
- 14 63. van HE, Trijp HC. Front-of-pack nutrition labels. Their effect on attention and choices  
15 when consumers have varying goals and time constraints. *Appetite* 2011;57:148-60.  
16
- 17 64. Bialkova S, van Trijp H. What determines consumer attention to nutrition labels?  
18 *Food Quality and Preference* 2010;21:1042-51.  
19
- 20 65. Jones G, Richardson M. An objective examination of consumer perception of nutrition  
21 information based on healthiness ratings and eye movements. *Public Health Nutrition* 2007;10:238-44.  
22
- 23 66. Kelly B, Hughes C, Chapman K et al. Consumer testing of the acceptability and  
24 effectiveness of front-of-pack food labelling systems for the Australian grocery market. *Health*  
25 *Promotion International* 2009;24:120-9.  
26
- 27 67. Pettigrew S, Talati Z, Miller C, Dixon H, Kelly B, Ball K. The types and aspects of  
28 front-of-pack food labelling schemes preferred by adults and children. *Appetite* 2016;109:115-23.  
29
- 30 68. Pampel FC, Krueger PM, Denney JT. Socioeconomic Disparities in Health Behaviors.  
31 *Annu Rev Sociol* 2010;36:349-70.  
32
- 33 69. Story M, Kaphingst KM, Robinson-O'Brien R, Glanz K. Creating healthy food and  
34 eating environments: Policy and environmental approaches. *PALO ALTO: ANNUAL REVIEWS,*  
35 2008.  
36
- 37 70. Andreeva VA, Salanave B, Castetbon K et al. Comparison of the sociodemographic  
38 characteristics of the large NutriNet-Sante e-cohort with French Census data: the issue of volunteer  
39 bias revisited. *J Epidemiol Community Health* 2015;69:893-8.  
40
- 41 71. Grunert KG, Wills JM. A review of European research on consumer response to  
42 nutrition information on food labels. *J Public Health* 2007;15:385-99.  
43
- 44 72. Grunert KG, Fernandez-Celemin L, Wills JM, Storcksdieck Genannt BS, Nureeva L.  
45 Use and understanding of nutrition information on food labels in six European countries. *Z Gesundh*  
46 *Wiss* 2010;18:261-77.  
47
- 48 73. Mejean C, Macouillard P, Peneau S, Lassale C, Hercberg S, Castetbon K. Association  
49 of Perception of Front-of-Pack Labels with Dietary, Lifestyle and Health Characteristics. *Plos One*  
50 2014;9.  
51  
52  
53  
54  
55  
56  
57  
58  
59  
60

1  
2  
3  
4  
5  
6  
7  
8  
9  
10  
11  
12  
13  
14  
15  
16  
17  
18  
19  
20  
21  
22  
23  
24  
25  
26  
27  
28  
29  
30  
31  
32  
33  
34  
35  
36  
37  
38  
39  
40  
41  
42  
43  
44  
45  
46  
47  
48  
49  
50  
51  
52  
53  
54  
55  
56  
57  
58  
59  
60

For peer review only

## FIGURE LEGENDS

**Figure 1:** Formats proposed for a front-of-pack nutrition label in France.

Caption:

Nutriscore developed by the EREN research team, is based on the British Food Standards Agency nutrient profiling system and presents for each food or beverage the overall nutritional quality on a five-point colour-code scale from Green to Red.

SENS, supported by retailers, is based on a nutrient profiling system developed by a research team, and presents for each food or beverage a recommended frequency of consumption, with a four points colour-coded scale (Green, Blue, Orange, Purple)

Multiple Traffic Lights, supported by industry, and implemented in Great Britain since 2005 presents the numeric values of the contribution of a portion of the food to the intakes in a balanced diet (in grams and percentage of reference intakes, corresponding to the reference intakes label, RI) for energy, fats, saturated fats, sugar and sodium, with a colour-coding (Green, Amber and Red) for each of these components of the food

Modified Reference Intakes (mRIs) present the numeric values of the reference intakes, in both grams and percentage of reference intakes, with bars varying in height depending on the amount of the component in the food.

**Figure 2:** Responses to each of the dimensions of perception in the various clusters

Caption: Each circle represents a cluster, each response to a dimension is scaled within the cluster.

Positive dimensions are situated on the right hand side of the figure, while negative dimensions are situated on the left hand side of the figure

Table 1 Characteristics of the study population, crude and after weighting

|                                    |                             | Crude |       | Weighted |
|------------------------------------|-----------------------------|-------|-------|----------|
|                                    |                             | n     | %     | %        |
| <b>Sex</b>                         |                             |       |       |          |
|                                    | Men                         | 5768  | 26.58 | 39.97    |
|                                    | Women                       | 15934 | 73.42 | 60.03    |
| <b>Age</b>                         |                             |       |       |          |
|                                    | 18-29 years-old             | 968   | 4.46  | 12.28    |
|                                    | 30-49 years-old             | 5900  | 27.19 | 31.05    |
|                                    | 50-64 years-old             | 7899  | 36.40 | 29.39    |
|                                    | ≥ 65 years old              | 6935  | 31.96 | 27.28    |
| <b>Educational level</b>           |                             |       |       |          |
|                                    | Up to secondary             | 6804  | 31.35 | 70.54    |
|                                    | University, up to two years | 6750  | 31.10 | 13.86    |
|                                    | University, ≥ 3 years       | 8148  | 37.54 | 15.60    |
| <b>Income per consumption unit</b> |                             |       |       |          |
|                                    | <1200/month                 | 2068  | 9.53  | 20.28    |
|                                    | [1200 - 1800[ €/month       | 4766  | 21.96 | 30.24    |
|                                    | [1800 - 2700[ €/month       | 6514  | 30.02 | 28.67    |
|                                    | ≥ 2700 €/month              | 8354  | 38.49 | 20.81    |
| <b>Household composition</b>       |                             |       |       |          |
|                                    | Adults only                 | 17118 | 78.88 | 78.05    |
|                                    | Adults and children         | 4584  | 21.12 | 21.95    |
| <b>Smoking status</b>              |                             |       |       |          |
|                                    | Current smoker              | 1923  | 8.86  | 10.16    |
|                                    | Former smoker               | 8710  | 40.13 | 39.81    |
|                                    | Never smoker                | 11069 | 51.00 | 50.03    |
| <b>Physical activity level</b>     |                             |       |       |          |
|                                    | High                        | 8007  | 36.90 | 39.01    |
|                                    | Moderate                    | 9128  | 42.06 | 37.28    |
|                                    | Low                         | 4567  | 21.04 | 23.72    |
| <b>mPNNS-GS</b>                    |                             |       |       |          |
|                                    | Quartile 1                  | 5425  | 25.00 | 23.70    |
|                                    | Quartile 2                  | 5582  | 25.72 | 23.86    |
|                                    | Quartile 3                  | 5933  | 27.34 | 26.20    |
|                                    | Quartile 4                  | 4762  | 21.94 | 26.24    |

Weighting was obtained using the SAS CALMAR Macro

**Table 2 Crude percentage of responses to the dimensions of perception of FOP labels**

|                                                        | Nutriscore | MTL   | SENS  | mRIs  | None  |
|--------------------------------------------------------|------------|-------|-------|-------|-------|
| This FOP label is helpful to choose healthier products | 40.02      | 26.93 | 17.33 | 9.14  | 6.57  |
| I want to see this FOP label on the front of packages  | 44.22      | 25.15 | 17.15 | 7.43  | 6.05  |
| This is my preferred FOP label                         | 43.79      | 24.92 | 17.17 | 6.68  | 7.45  |
| This FOP label provides me with the information I need | 24.51      | 43.06 | 15.78 | 11.44 | 5.21  |
| This FOP label is trustworthy                          | 37.64      | 28.83 | 15.23 | 8.52  | 9.79  |
| This FOP label provides reliable information           | 26.76      | 40.32 | 10.55 | 11.75 | 10.62 |
| This FOP label is easy to identify                     | 62.53      | 8.78  | 21.37 | 2.75  | 4.56  |
| This label is easy to understand                       | 52.22      | 7.86  | 33.5  | 3.43  | 2.99  |
| This FOP label is quick to process                     | 64.09      | 8.07  | 22.27 | 2.9   | 2.68  |
| This FOP label is too complex for understanding        | 4.49       | 19.9  | 5.7   | 48.22 | 21.7  |
| This FOP label takes too long to understand            | 2.52       | 25.45 | 2.86  | 50.81 | 18.36 |
| This is the FOP label I appreciate the least           | 9.67       | 12.58 | 17.44 | 51.33 | 8.98  |
| This FOP label is guilt-laden                          | 12.42      | 9.32  | 21.19 | 6.83  | 50.23 |

Table 3 Multivariable adjusted socio-demographic, lifestyle and dietary characteristics according to the various clusters of preference for FOP nutrition labeling

|                                    | Nutriscore   | MTL          | SENS         | mRIs         | None         | <i>P</i> |
|------------------------------------|--------------|--------------|--------------|--------------|--------------|----------|
|                                    | 43.23        | 27.31        | 17.05        | 7.31         | 5.10         |          |
| <b>Sex</b>                         |              |              |              |              |              | <0,0001  |
| Men                                | <b>41.88</b> | 37.23        | 37.48        | <b>35.67</b> | 40.14        |          |
| Women                              | 58.12        | 62.77        | 62.52        | 64.33        | 59.86        |          |
| <b>Age</b>                         |              |              |              |              |              | <0,0001  |
| 18-29 years-old                    | 11.11        | <b>13.90</b> | 11.06        | 11.82        | 3.93         |          |
| 30-49 years-old                    | 64.66        | 68.43        | 67.53        | 66.86        | 64.92        |          |
| 50-64 years-old                    | 21.40        | 15.86        | 19.04        | 18.05        | 25.76        |          |
| ≥ 65 years old                     | 2.84         | 1.81         | 2.37         | 3.27         | <b>5.40</b>  |          |
| <b>Educational level</b>           |              |              |              |              |              | <0,0001  |
| Up to secondary                    | 72.64        | 67.59        | 72.05        | 77.71        | <b>77.84</b> |          |
| University, up to two years        | 15.26        | 16.81        | 15.72        | 12.79        | 12.21        |          |
| University, ≥ 3 years              | 12.09        | <b>15.61</b> | 12.23        | 9.50         | 9.95         |          |
| <b>Income per consumption unit</b> |              |              |              |              |              | <0,0001  |
| <1200/month                        | 14.57        | <b>20.07</b> | 16.36        | 17.17        | 13.95        |          |
| [1200 - 1800[ €/month              | 32.61        | 31.47        | 35.57        | 35.71        | 36.83        |          |
| [1800 - 2700[ €/month              | 30.96        | 29.29        | 29.41        | 29.17        | 30.45        |          |
| ≥ 2700 €/month                     | <b>21.85</b> | 19.16        | 18.66        | 17.96        | 18.77        |          |
| <b>Household composition</b>       |              |              |              |              |              | <0,0001  |
| Adults only                        | 87.76        | 88.57        | 86.99        | 88.60        | <b>90.35</b> |          |
| Adults and children                | 12.24        | 11.43        | <b>13.01</b> | 11.40        | 9.65         |          |
| <b>Smoking status</b>              |              |              |              |              |              | <0,0001  |
| Current smoker                     | 10.91        | 11.33        | 9.94         | 9.35         | <b>15.59</b> |          |
| Former smoker                      | 31.74        | 34.95        | 34.21        | 35.63        | 32.69        |          |
| Never smoker                       | <b>57.35</b> | 53.72        | 55.85        | 55.02        | 51.73        |          |
| <b>Physical activity level</b>     |              |              |              |              |              | <0,0001  |
| High                               | 31.73        | 34.19        | 31.12        | <b>35.93</b> | 29.38        |          |
| Moderate                           | 40.97        | 44.91        | 41.20        | 41.62        | 43.90        |          |
| Low                                | 27.30        | 20.90        | <b>27.68</b> | 22.44        | 26.71        |          |
| <b>mPNNS-GS</b>                    |              |              |              |              |              | <0,0001  |
| Quartile 1                         | 28.28        | 25.09        | 23.90        | 21.63        | <b>32.47</b> |          |
| Quartile 2                         | 25.90        | 22.09        | 26.67        | 20.08        | 30.08        |          |
| Quartile 3                         | 26.86        | 28.44        | 26.96        | 30.87        | 21.86        |          |
| Quartile 4                         | 18.96        | 24.37        | 22.47        | 27.42        | <b>15.59</b> |          |

Mutually adjusted percentages obtained with multinomial regression

1  
2  
3  
4  
5  
6  
7  
8  
9  
10  
11  
12  
13  
14  
15  
16  
17  
18  
19  
20  
21  
22  
23  
24  
25  
26  
27  
28  
29  
30  
31  
32  
33  
34  
35  
36  
37  
38  
39  
40  
41  
42  
43  
44  
45  
46  
47  
48  
49  
50  
51  
52  
53  
54  
55  
56  
57  
58  
59  
60

Nutriscore

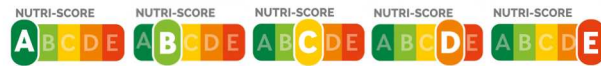

SENS

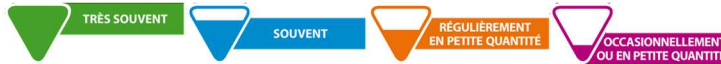

Modified Reference Intakes

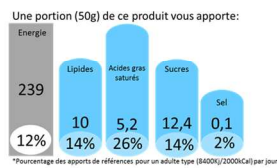

Multiple Traffic Lights

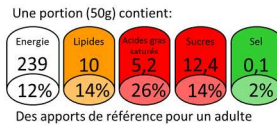

Formats proposed for a front-of-pack nutrition label in France.

Caption:

Nutriscore developed by the EREN research team, is based on the British Food Standards Agency nutrient profiling system and presents for each food or beverage the overall nutritional quality on a five-point colour-code scale from Green to Red.

SENS, supported by retailers, is based on a nutrient profiling system developed by a research team, and presents for each food or beverage a recommended frequency of consumption, with a four points colour-coded scale (Green, Blue, Orange, Purple)

Multiple Traffic Lights, supported by industry, and implemented in Great Britain since 2005 presents the numeric values of the contribution of a portion of the food to the intakes in a balanced diet (in grams and percentage of reference intakes, corresponding to the reference intakes label, RI) for energy, fats, saturated fats, sugar and sodium, with a colour-coding (Green, Amber and Red) for each of these components of the food

Modified Reference Intakes (mRIs) present the numeric values of the reference intakes, in both grams and percentage of reference intakes, with bars varying in height depending on the amount of the component in the food.

254x190mm (300 x 300 DPI)



1  
2  
3  
4  
5  
6  
7  
8  
9  
10  
11  
12  
13  
14  
15  
16  
17  
18  
19  
20  
21  
22  
23  
24  
25  
26  
27  
28  
29  
30  
31  
32  
33  
34  
35  
36  
37  
38  
39  
40  
41  
42  
43  
44  
45  
46  
47  
48  
49  
50  
51  
52  
53  
54  
55  
56  
57  
58  
59  
60

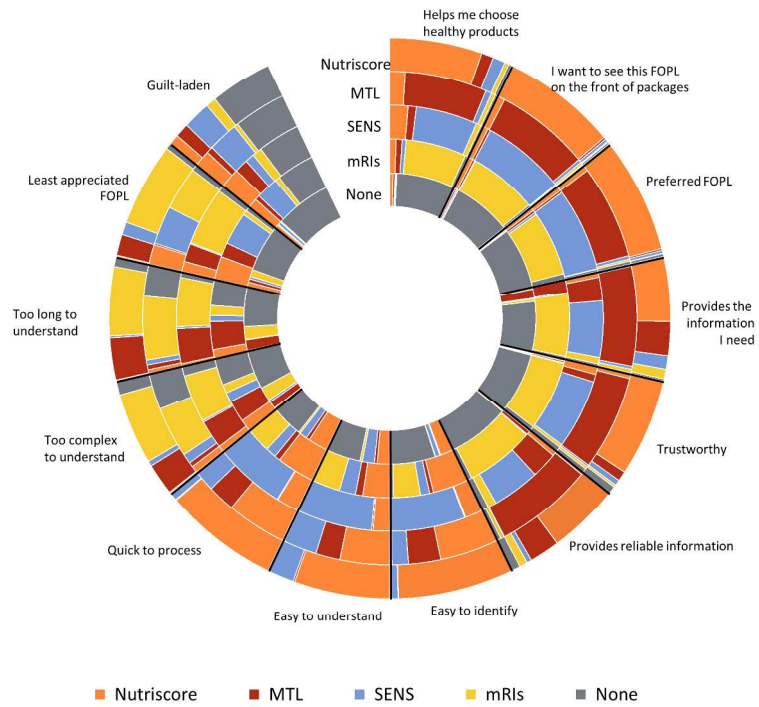

Responses to each of the dimensions of perception in the various clusters  
 Caption: Each circle represents a cluster, each response to a dimension is scaled within the cluster. Positive dimensions are situated on the right hand side of the figure, while negative dimensions are situated on the left hand side of the figure

254x190mm (300 x 300 DPI)

Online supplementary material

**Supplemental Table 1 Questionnaire used to assess perception of the various FOP nutrition labels (French version and English translation)**

| Question (English Translation)                         | Question (Original question in French)                      |
|--------------------------------------------------------|-------------------------------------------------------------|
| This FOP label is helpful to choose healthier products | Ce logo aide à choisir des produits meilleurs pour la santé |
| I want to see this FOP label on the front of packages  | Je veux qu'il soit présent sur les emballages               |
| This is my preferred FOP label                         | C'est mon logo préféré                                      |
| This is the FOP label I appreciate the least           | C'est le logo que j'aime le moins                           |
| This FOP label provides me with the information I need | Ce logo m'apporte l'information dont j'ai besoin            |
| This FOP label is trustworthy                          | Ce logo m'inspire confiance                                 |
| This FOP label provides reliable information           | Ce logo permet d'avoir une information fiable               |
| This FOP label is easy to identify                     | Ce logo est facile à repérer                                |
| This label is easy to understand                       | Ce logo est facile à comprendre                             |
| This FOP label is quick to process                     | Ce logo permet d'avoir une information rapide               |
| This FOP label is too complex for understanding        | Ce logo est trop compliqué à comprendre                     |
| This FOP label takes too long to understand            | Ce logo est trop long à comprendre                          |
| This FOP label is guilt-laden                          | Ce logo est culpabilisant                                   |

Online supplementary material

Supplemental Table 2 responses to perception questions according clusters of preference for FOP nutrition labeling

Liking

|                                                        | Nutriscore | MTL   | SENS  | mRIs  | None  |
|--------------------------------------------------------|------------|-------|-------|-------|-------|
| This FOP label is helpful to choose healthier products |            |       |       |       |       |
| Nutriscore                                             | 74.32      | 13.93 | 19.21 | 7.81  | 4.84  |
| SENS                                                   | 9.91       | 5.45  | 65.23 | 4.96  | 1.54  |
| MTL                                                    | 9.78       | 75.12 | 8.65  | 7.54  | 3.2   |
| mRIs                                                   | 3.64       | 3.86  | 5.23  | 76.19 | 1.03  |
| None                                                   | 2.36       | 1.64  | 1.68  | 3.51  | 89.4  |
| I want to see this FOP label on the front of packages  |            |       |       |       |       |
| Nutriscore                                             | 93.45      | 7.64  | 6.32  | 6.89  | 3.1   |
| SENS                                                   | 2.34       | 2.99  | 88.89 | 0.66  | 2.35  |
| MTL                                                    | 1.73       | 86.27 | 2.92  | 2.75  | 2.73  |
| mRIs                                                   | 0.82       | 2.21  | 0.59  | 86.66 | 0.81  |
| None                                                   | 1.66       | 0.89  | 1.28  | 3.04  | 91    |
| This is my preferred FOP label                         |            |       |       |       |       |
| Nutriscore                                             | 93.51      | 6.24  | 6.18  | 5.94  | 3.33  |
| SENS                                                   | 2.3        | 3.12  | 88.31 | 2.9   | 1.05  |
| MTL                                                    | 1.53       | 86.06 | 2.54  | 3.23  | 1.7   |
| mRIs                                                   | 0.33       | 1.84  | 0.42  | 81.23 | 0.47  |
| None                                                   | 2.33       | 2.74  | 2.55  | 6.7   | 93.45 |
| This is the FOP label I appreciate the least           |            |       |       |       |       |
| Nutriscore                                             | 1.08       | 17.92 | 10.9  | 28.78 | 6.79  |
| SENS                                                   | 10.36      | 34.9  | 1.31  | 41.12 | 3.96  |
| MTL                                                    | 16.91      | 1.51  | 19.14 | 18.16 | 5.23  |
| mRIs                                                   | 66.88      | 39.88 | 61.86 | 5.85  | 10.78 |
| None                                                   | 4.77       | 5.78  | 6.78  | 6.09  | 73.24 |

1 Online supplementary material

2 **Awareness and trustworthiness**

3

4

|                                                          | Nutriscore | MTL   | SENS  | mRIs  | None  |
|----------------------------------------------------------|------------|-------|-------|-------|-------|
| 5 This FOP label provides me with the information I need |            |       |       |       |       |
| 6 Nutriscore                                             | 52.36      | 2.01  | 6.25  | 0.56  | 4.21  |
| 7 SENS                                                   | 10.83      | 2.66  | 59.59 | 1.74  | 1.71  |
| 8 MTL                                                    | 27.37      | 91.49 | 25.14 | 16.79 | 14.24 |
| 9 mRIs                                                   | 7.78       | 3.58  | 6.87  | 78.6  | 3.66  |
| 10 None                                                  | 1.67       | 0.25  | 2.16  | 2.31  | 76.17 |
| 11 This FOP label is trustworthy                         |            |       |       |       |       |
| 12 Nutriscore                                            | 79.33      | 4.82  | 9.29  | 3.48  | 3.67  |
| 13 SENS                                                  | 4.55       | 1.79  | 74.04 | 0.98  | 1.5   |
| 14 MTL                                                   | 7.98       | 87.15 | 8.04  | 1.98  | 1.21  |
| 15 mRIs                                                  | 1.96       | 2.43  | 3.35  | 87.89 | 0.28  |
| 16 None                                                  | 6.18       | 3.81  | 5.29  | 5.67  | 93.34 |
| 17 This FOP label provides reliable information          |            |       |       |       |       |
| 18 Nutriscore                                            | 57.78      | 2.37  | 5.76  | 1.95  | 0.23  |
| 19 SENS                                                  | 3.92       | 0.48  | 50.74 | 0.88  | 0.12  |
| 20 MTL                                                   | 24.47      | 90.22 | 27.44 | 4.67  | 1.53  |
| 21 mRIs                                                  | 6.54       | 3.18  | 9.22  | 87.05 | 2.36  |
| 22 None                                                  | 7.29       | 3.75  | 6.84  | 5.45  | 95.75 |
| 23 This FOP label is easy to identify                    |            |       |       |       |       |
| 24 Nutriscore                                            | 93.08      | 53.69 | 19.15 | 45.28 | 20.69 |
| 25 SENS                                                  | 6.03       | 15.02 | 79.02 | 11.56 | 6.82  |
| 26 MTL                                                   | 0.34       | 29.44 | 0.99  | 4.83  | 1.41  |
| 27 mRIs                                                  | 0.08       | 0.6   | 0.32  | 33.66 | 0.78  |
| 28 None                                                  | 0.47       | 1.25  | 0.53  | 4.68  | 70.29 |

29

30

31

32

33

34

35

36

37

38

39

40

41

42

43

44

45

46

47

1 Online supplementary material

2 **Perceived cognitive workload**

| 3  |                                                 | Nutriscore | MTL   | SENS  | mRIs  | None  |
|----|-------------------------------------------------|------------|-------|-------|-------|-------|
| 4  |                                                 |            |       |       |       |       |
| 5  | This label is easy to understand                |            |       |       |       |       |
| 6  | Nutriscore                                      | 77.11      | 45.5  | 17.55 | 33.92 | 19.4  |
| 7  | SENS                                            | 20.75      | 30.45 | 80.77 | 20.47 | 18.54 |
| 8  | MTL                                             | 1.41       | 22.27 | 1.58  | 9.16  | 4.46  |
| 9  | mRIs                                            | 0.51       | 1.46  | 0.09  | 35.6  | 3.72  |
| 10 | None                                            | 0.22       | 0.33  | 0     | 0.85  | 53.88 |
| 11 |                                                 |            |       |       |       |       |
| 12 | This FOP label is quick to process              |            |       |       |       |       |
| 13 | Nutriscore                                      | 92.72      | 55.07 | 23.2  | 47.31 | 30.42 |
| 14 | SENS                                            | 6.18       | 18.75 | 75.65 | 13.43 | 11.67 |
| 15 | MTL                                             | 0.62       | 25.17 | 0.75  | 7.31  | 5.22  |
| 16 | mRIs                                            | 0.38       | 0.88  | 0.39  | 31.18 | 2.88  |
| 17 | None                                            | 0.1        | 0.12  | 0.01  | 0.78  | 49.82 |
| 18 |                                                 |            |       |       |       |       |
| 19 | This FOP label is too complex for understanding |            |       |       |       |       |
| 20 | Nutriscore                                      | 0.99       | 6.38  | 6.36  | 14.98 | 2.75  |
| 21 | SENS                                            | 4.23       | 9.09  | 1.86  | 12.2  | 3.51  |
| 22 | MTL                                             | 25.49      | 4.24  | 30.07 | 27.56 | 11.35 |
| 23 | mRIs                                            | 57.73      | 46.53 | 50.78 | 10.9  | 21.55 |
| 24 | None                                            | 11.56      | 33.77 | 10.92 | 34.35 | 60.84 |
| 25 |                                                 |            |       |       |       |       |
| 26 | This FOP label takes too long to understand     |            |       |       |       |       |
| 27 | Nutriscore                                      | 0.77       | 3.45  | 2.37  | 11.12 | 0.65  |
| 28 | SENS                                            | 1.57       | 4.47  | 2.19  | 7.43  | 0.81  |
| 29 | MTL                                             | 33.71      | 4.33  | 36.95 | 35.12 | 16.19 |
| 30 | mRIs                                            | 55.76      | 58.12 | 52.13 | 12.73 | 19.83 |
| 31 | None                                            | 8.19       | 29.63 | 6.36  | 33.6  | 62.51 |
| 32 |                                                 |            |       |       |       |       |
| 33 | This FOP label is guilt-laden                   |            |       |       |       |       |
| 34 | Nutriscore                                      | 8.33       | 14.8  | 21.33 | 12.13 | 4.97  |
| 35 | SENS                                            | 22.37      | 27.72 | 9.68  | 28.3  | 4.59  |
| 36 | MTL                                             | 11.15      | 5.87  | 14.04 | 5.84  | 1.59  |
| 37 | mRIs                                            | 8.23       | 3.73  | 10.16 | 5.93  | 1.73  |
| 38 | None                                            | 49.93      | 47.89 | 44.78 | 47.8  | 87.12 |
| 39 |                                                 |            |       |       |       |       |
| 40 |                                                 |            |       |       |       |       |
| 41 |                                                 |            |       |       |       |       |
| 42 |                                                 |            |       |       |       |       |
| 43 |                                                 |            |       |       |       |       |
| 44 |                                                 |            |       |       |       |       |
| 45 |                                                 |            |       |       |       |       |
| 46 |                                                 |            |       |       |       |       |
| 47 |                                                 |            |       |       |       |       |

Online supplementary material

1  
2  
3  
4  
5  
6  
7  
8  
9  
10  
11  
12  
13  
14  
15  
16  
17  
18  
19  
20  
21  
22  
23  
24  
25  
26  
27  
28  
29  
30  
31  
32  
33  
34  
35  
36  
37  
38  
39  
40  
41  
42  
43  
44  
45  
46  
47

For peer review only

STROBE Statement—Checklist of items that should be included in reports of *cross-sectional studies*

|                              | Item No | Recommendation                                                                                                                                                                                                                                                                                                                                                                                                                                |
|------------------------------|---------|-----------------------------------------------------------------------------------------------------------------------------------------------------------------------------------------------------------------------------------------------------------------------------------------------------------------------------------------------------------------------------------------------------------------------------------------------|
| <b>Title and abstract</b>    | 1       | (a) Indicate the study's design with a commonly used term in the title or the abstract <b>Page 4</b><br>(b) Provide in the abstract an informative and balanced summary of what was done and what was found <b>Page 4</b>                                                                                                                                                                                                                     |
| <b>Introduction</b>          |         |                                                                                                                                                                                                                                                                                                                                                                                                                                               |
| Background/rationale         | 2       | Explain the scientific background and rationale for the investigation being reported <b>Page 6</b>                                                                                                                                                                                                                                                                                                                                            |
| Objectives                   | 3       | State specific objectives, including any prespecified hypotheses <b>Page 7</b>                                                                                                                                                                                                                                                                                                                                                                |
| <b>Methods</b>               |         |                                                                                                                                                                                                                                                                                                                                                                                                                                               |
| Study design                 | 4       | Present key elements of study design early in the paper <b>Page 8</b>                                                                                                                                                                                                                                                                                                                                                                         |
| Setting                      | 5       | Describe the setting, locations, and relevant dates, including periods of recruitment, exposure, follow-up, and data collection <b>Page 8</b>                                                                                                                                                                                                                                                                                                 |
| Participants                 | 6       | (a) Give the eligibility criteria, and the sources and methods of selection of participants <b>Page 8-10</b>                                                                                                                                                                                                                                                                                                                                  |
| Variables                    | 7       | Clearly define all outcomes, exposures, predictors, potential confounders, and effect modifiers. Give diagnostic criteria, if applicable <b>Page 8-10</b>                                                                                                                                                                                                                                                                                     |
| Data sources/<br>measurement | 8*      | For each variable of interest, give sources of data and details of methods of assessment (measurement). Describe comparability of assessment methods if there is more than one group <b>Page 8-10</b>                                                                                                                                                                                                                                         |
| Bias                         | 9       | Describe any efforts to address potential sources of bias <b>Page 10</b>                                                                                                                                                                                                                                                                                                                                                                      |
| Study size                   | 10      | Explain how the study size was arrived at <b>Page 11</b>                                                                                                                                                                                                                                                                                                                                                                                      |
| Quantitative variables       | 11      | Explain how quantitative variables were handled in the analyses. If applicable, describe which groupings were chosen and why <b>Page 8-10</b>                                                                                                                                                                                                                                                                                                 |
| Statistical methods          | 12      | (a) Describe all statistical methods, including those used to control for confounding <b>Page 10-11</b><br>(b) Describe any methods used to examine subgroups and interactions <b>Not applicable</b><br>(c) Explain how missing data were addressed <b>Page 10</b><br>(d) If applicable, describe analytical methods taking account of sampling strategy <b>Not Applicable</b><br>(e) Describe any sensitivity analyses <b>Not Applicable</b> |
| <b>Results</b>               |         |                                                                                                                                                                                                                                                                                                                                                                                                                                               |
| Participants                 | 13*     | (a) Report numbers of individuals at each stage of study—eg numbers potentially eligible, examined for eligibility, confirmed eligible, included in the study, completing follow-up, and analysed <b>Page 11</b><br>(b) Give reasons for non-participation at each stage <b>Page 11</b><br>(c) Consider use of a flow diagram                                                                                                                 |
| Descriptive data             | 14*     | (a) Give characteristics of study participants (eg demographic, clinical, social) and information on exposures and potential confounders <b>Page 12, Table 1</b><br>(b) Indicate number of participants with missing data for each variable of interest <b>Page 11</b>                                                                                                                                                                        |
| Outcome data                 | 15*     | Report numbers of outcome events or summary measures <b>Page 12, Table 2</b>                                                                                                                                                                                                                                                                                                                                                                  |
| Main results                 | 16      | (a) Give unadjusted estimates and, if applicable, confounder-adjusted estimates and their precision (eg, 95% confidence interval). Make clear which confounders were                                                                                                                                                                                                                                                                          |

|                          |    |                                                                                                                                                                                              |
|--------------------------|----|----------------------------------------------------------------------------------------------------------------------------------------------------------------------------------------------|
|                          |    | adjusted for and why they were included <b>Page 12-13, Tables</b>                                                                                                                            |
|                          |    | (b) Report category boundaries when continuous variables were categorized <b>Page 8-10, Tables</b>                                                                                           |
|                          |    | (c) If relevant, consider translating estimates of relative risk into absolute risk for a meaningful time period <b>Not Applicable</b>                                                       |
| Other analyses           | 17 | Report other analyses done—eg analyses of subgroups and interactions, and sensitivity analyses                                                                                               |
| <b>Discussion</b>        |    |                                                                                                                                                                                              |
| Key results              | 18 | Summarise key results with reference to study objectives <b>Page 13</b>                                                                                                                      |
| Limitations              | 19 | Discuss limitations of the study, taking into account sources of potential bias or imprecision. Discuss both direction and magnitude of any potential bias <b>Page 16</b>                    |
| Interpretation           | 20 | Give a cautious overall interpretation of results considering objectives, limitations, multiplicity of analyses, results from similar studies, and other relevant evidence <b>Page 13-16</b> |
| Generalisability         | 21 | Discuss the generalisability (external validity) of the study results <b>Page 16</b>                                                                                                         |
| <b>Other information</b> |    |                                                                                                                                                                                              |
| Funding                  | 22 | Give the source of funding and the role of the funders for the present study and, if applicable, for the original study on which the present article is based <b>Page 3</b>                  |

\*Give information separately for exposed and unexposed groups.

**Note:** An Explanation and Elaboration article discusses each checklist item and gives methodological background and published examples of transparent reporting. The STROBE checklist is best used in conjunction with this article (freely available on the Web sites of PLoS Medicine at <http://www.plosmedicine.org/>, Annals of Internal Medicine at <http://www.annals.org/>, and Epidemiology at <http://www.epidem.com/>). Information on the STROBE Initiative is available at [www.strobe-statement.org](http://www.strobe-statement.org).
