# Supplementary material for: Perception of different formats of front-of-pack nutrition labels according to sociodemographic, lifestyle and dietary factors in a French population: cross-sectional study among the NutriNet-Santé cohort participants
Source: PubMed Central journal article supplement — BMJ Open. 2017 Jun 15;7(6):e016108. doi: 10.1136/bmjopen-2017-016108 (PMC5726055; doi:10.1136/bmjopen-2017-016108), 2017-06-15
Supplement: bmjopen-2017-016108supp001.pdf [file bmjopen-2017-016108supp001.pdf]

Online supplementary material

**Supplemental Table 1 Questionnaire used to assess perception of the various FOP nutrition labels (French version and English translation)**

Question (English Translation)

This FOP label is helpful to choose healthier products

I want to see this FOP label on the front of packages

This is my preferred FOP label

This is the FOP label I appreciate the least

This FOP label provides me with the information I need

This FOP label is trustworthy

This FOP label provides reliable information

This FOP label is easy to identify

This label is easy to understand

This FOP label is quick to process

This FOP label is too complex for understanding

This FOP label takes too long to understand

This FOP label is guilt-laden

Question (Original question in French)

Ce logo aide à choisir des produits meilleurs pour la santé

Je veux qu'il soit présent sur les emballages

C'est mon logo préféré

C'est le logo que j'aime le moins

Ce logo m'apporte l'information dont j'ai besoin

Ce logo m'inspire confiance

Ce logo permet d'avoir une information fiable

Ce logo est facile à repérer

Ce logo est facile à comprendre

Ce logo permet d'avoir une information rapide

Ce logo est trop compliqué à comprendre

Ce logo est trop long à comprendre

Ce logo est culpabilisant

Supplemental Table 2 responses to perception questions according clusters of preference for FOP nutrition labeling

**Liking**

|                                                        | Nutriscore | MTL   | SENS  | mRIs  | None  |
|--------------------------------------------------------|------------|-------|-------|-------|-------|
| This FOP label is helpful to choose healthier products |            |       |       |       |       |
| Nutriscore                                             | 74.32      | 13.93 | 19.21 | 7.81  | 4.84  |
| SENS                                                   | 9.91       | 5.45  | 65.23 | 4.96  | 1.54  |
| MTL                                                    | 9.78       | 75.12 | 8.65  | 7.54  | 3.2   |
| mRIs                                                   | 3.64       | 3.86  | 5.23  | 76.19 | 1.03  |
| None                                                   | 2.36       | 1.64  | 1.68  | 3.51  | 89.4  |
| I want to see this FOP label on the front of packages  |            |       |       |       |       |
| Nutriscore                                             | 93.45      | 7.64  | 6.32  | 6.89  | 3.1   |
| SENS                                                   | 2.34       | 2.99  | 88.89 | 0.66  | 2.35  |
| MTL                                                    | 1.73       | 86.27 | 2.92  | 2.75  | 2.73  |
| mRIs                                                   | 0.82       | 2.21  | 0.59  | 86.66 | 0.81  |
| None                                                   | 1.66       | 0.89  | 1.28  | 3.04  | 91    |
| This is my preferred FOP label                         |            |       |       |       |       |
| Nutriscore                                             | 93.51      | 6.24  | 6.18  | 5.94  | 3.33  |
| SENS                                                   | 2.3        | 3.12  | 88.31 | 2.9   | 1.05  |
| MTL                                                    | 1.53       | 86.06 | 2.54  | 3.23  | 1.7   |
| mRIs                                                   | 0.33       | 1.84  | 0.42  | 81.23 | 0.47  |
| None                                                   | 2.33       | 2.74  | 2.55  | 6.7   | 93.45 |
| This is the FOP label I appreciate the least           |            |       |       |       |       |
| Nutriscore                                             | 1.08       | 17.92 | 10.9  | 28.78 | 6.79  |
| SENS                                                   | 10.36      | 34.9  | 1.31  | 41.12 | 3.96  |
| MTL                                                    | 16.91      | 1.51  | 19.14 | 18.16 | 5.23  |
| mRIs                                                   | 66.88      | 39.88 | 61.86 | 5.85  | 10.78 |
| None                                                   | 4.77       | 5.78  | 6.78  | 6.09  | 73.24 |

Online supplementary material

**Awareness and trustworthiness**

|                                                        | Nutriscore | MTL   | SENS  | mRIs  | None  |
|--------------------------------------------------------|------------|-------|-------|-------|-------|
| This FOP label provides me with the information I need |            |       |       |       |       |
| Nutriscore                                             | 52.36      | 2.01  | 6.25  | 0.56  | 4.21  |
| SENS                                                   | 10.83      | 2.66  | 59.59 | 1.74  | 1.71  |
| MTL                                                    | 27.37      | 91.49 | 25.14 | 16.79 | 14.24 |
| mRIs                                                   | 7.78       | 3.58  | 6.87  | 78.6  | 3.66  |
| None                                                   | 1.67       | 0.25  | 2.16  | 2.31  | 76.17 |
| This FOP label is trustworthy                          |            |       |       |       |       |
| Nutriscore                                             | 79.33      | 4.82  | 9.29  | 3.48  | 3.67  |
| SENS                                                   | 4.55       | 1.79  | 74.04 | 0.98  | 1.5   |
| MTL                                                    | 7.98       | 87.15 | 8.04  | 1.98  | 1.21  |
| mRIs                                                   | 1.96       | 2.43  | 3.35  | 87.89 | 0.28  |
| None                                                   | 6.18       | 3.81  | 5.29  | 5.67  | 93.34 |
| This FOP label provides reliable information           |            |       |       |       |       |
| Nutriscore                                             | 57.78      | 2.37  | 5.76  | 1.95  | 0.23  |
| SENS                                                   | 3.92       | 0.48  | 50.74 | 0.88  | 0.12  |
| MTL                                                    | 24.47      | 90.22 | 27.44 | 4.67  | 1.53  |
| mRIs                                                   | 6.54       | 3.18  | 9.22  | 87.05 | 2.36  |
| None                                                   | 7.29       | 3.75  | 6.84  | 5.45  | 95.75 |
| This FOP label is easy to identify                     |            |       |       |       |       |
| Nutriscore                                             | 93.08      | 53.69 | 19.15 | 45.28 | 20.69 |
| SENS                                                   | 6.03       | 15.02 | 79.02 | 11.56 | 6.82  |
| MTL                                                    | 0.34       | 29.44 | 0.99  | 4.83  | 1.41  |
| mRIs                                                   | 0.08       | 0.6   | 0.32  | 33.66 | 0.78  |
| None                                                   | 0.47       | 1.25  | 0.53  | 4.68  | 70.29 |

Online supplementary material

**Perceived cognitive workload**

|                                                        | Nutriscore | MTL   | SENS  | mRIs  | None  |
|--------------------------------------------------------|------------|-------|-------|-------|-------|
| <b>This label is easy to understand</b>                |            |       |       |       |       |
| Nutriscore                                             | 77.11      | 45.5  | 17.55 | 33.92 | 19.4  |
| SENS                                                   | 20.75      | 30.45 | 80.77 | 20.47 | 18.54 |
| MTL                                                    | 1.41       | 22.27 | 1.58  | 9.16  | 4.46  |
| mRIs                                                   | 0.51       | 1.46  | 0.09  | 35.6  | 3.72  |
| None                                                   | 0.22       | 0.33  | 0     | 0.85  | 53.88 |
| <b>This FOP label is quick to process</b>              |            |       |       |       |       |
| Nutriscore                                             | 92.72      | 55.07 | 23.2  | 47.31 | 30.42 |
| SENS                                                   | 6.18       | 18.75 | 75.65 | 13.43 | 11.67 |
| MTL                                                    | 0.62       | 25.17 | 0.75  | 7.31  | 5.22  |
| mRIs                                                   | 0.38       | 0.88  | 0.39  | 31.18 | 2.88  |
| None                                                   | 0.1        | 0.12  | 0.01  | 0.78  | 49.82 |
| <b>This FOP label is too complex for understanding</b> |            |       |       |       |       |
| Nutriscore                                             | 0.99       | 6.38  | 6.36  | 14.98 | 2.75  |
| SENS                                                   | 4.23       | 9.09  | 1.86  | 12.2  | 3.51  |
| MTL                                                    | 25.49      | 4.24  | 30.07 | 27.56 | 11.35 |
| mRIs                                                   | 57.73      | 46.53 | 50.78 | 10.9  | 21.55 |
| None                                                   | 11.56      | 33.77 | 10.92 | 34.35 | 60.84 |
| <b>This FOP label takes too long to understand</b>     |            |       |       |       |       |
| Nutriscore                                             | 0.77       | 3.45  | 2.37  | 11.12 | 0.65  |
| SENS                                                   | 1.57       | 4.47  | 2.19  | 7.43  | 0.81  |
| MTL                                                    | 33.71      | 4.33  | 36.95 | 35.12 | 16.19 |
| mRIs                                                   | 55.76      | 58.12 | 52.13 | 12.73 | 19.83 |
| None                                                   | 8.19       | 29.63 | 6.36  | 33.6  | 62.51 |
| <b>This FOP label is guilt-laden</b>                   |            |       |       |       |       |
| Nutriscore                                             | 8.33       | 14.8  | 21.33 | 12.13 | 4.97  |
| SENS                                                   | 22.37      | 27.72 | 9.68  | 28.3  | 4.59  |
| MTL                                                    | 11.15      | 5.87  | 14.04 | 5.84  | 1.59  |
| mRIs                                                   | 8.23       | 3.73  | 10.16 | 5.93  | 1.73  |
| None                                                   | 49.93      | 47.89 | 44.78 | 47.8  | 87.12 |

Online supplementary material
